# Supplementary material for: Benchmarking RNA-seq with the Quartet Reference Materials to establish Best Practices for Accurate Alternative Splicing Detection
Source: Research Square preprint supplement (doi:10.21203/rs.3.rs-7716867/v1), 2025-11-05
Supplement: Supplementary file 1 [file 44ceae7370473300252348b7.xlsx]

## Sheet: Isoform validation
Supplementary Data 4. Primers and probes for isoform-level RT-qPCR validation.
Gene ID	Gene	Isoform ID	Isoform	Forward primer	Reverse primer	Probe
ENSG00000049249	TNFRSF9	ENST00000377507	TNFRSF9-201	TCCGCAGATCATCTCCTTCTT	ACTGGTCTCATAAATGGTTGTTTGA
ENSG00000006453	BAIAP2L1	ENST00000005260	BAIAP2L1-201	ACTTGTCTGAGAATAGCAGTGTTGT	CCGTTGGCATCGTTAGGAGC
ENSG00000140379	BCL2A1	ENST00000335661	BCL2A1-202	CGGATGTGGATACCTATAAGGAGAT	AGGTGTGTGATTGTGCCATTT
ENSG00000185112	FAM43A	ENST00000329759	FAM43A-201	CTGTGTTCTCAGAGCTGAATGTT	TCCTCTTTATTCTCTCCCCACTG
ENSG00000133328	PLAAT2	ENST00000255695	PLAAT2-201	GGACACAGAGTCAGCAACAC	GCATAGCCAAAGCGAGAAATCT
ENSG00000118508	RAB32	ENST00000367495	RAB32-201	TTGAAACCTCTGCAAAGGATAACA	TTCTCTGCTCTCAAGGTCTCTT
ENSG00000089157	RPLP0	ENST00000313104	RPLP0-202	CCATTGAAATCCTGGGTGTCC	TCAGCAAGTGGGAAGGTGTA
ENSG00000140612	SEC11A	ENST00000455959	SEC11A-202	CAAGCGGCAGGTACAATGAG	TGCTTCACACATGGCAAGAG
ENSG00000170689	HOXB9	ENST00000311177	HOXB9-201	AGGCCGTGCTGTCTAATCA	CGGAGGGGTTGGTTTGATC
ENSG00000145990	GFOD1	ENST00000379287	GFOD1-203	CCTTCTACACTAGCCGCATTG	GCCGATGCCTAGGGTTTTG
ENSG00000108592	FTSJ3	ENST00000427159	FTSJ3-201	TGAGCAGAGAGGAGGATGTC	AACACCGAACTTCCCTTTAACG
ENSG00000176340	COX8A	ENST00000314133	COX8A-201	AGCTTGGGATCATGGAATTGG	GTAGGTCTCCAGGTGTGACA
ENSG00000216490	IFI30	ENST00000407280	IFI30-201	GTCACCGTCAATGGGAAACC	GCCATCACTTGAAGCAAACAC
ENSG00000198890	PRMT6	ENST00000370078	PRMT6-201	CCTGACACCTCACACCTTATC	GGAAGAAGTACCATAGCCTACAG
ENSG00000111639	MRPL51	ENST00000229238	MRPL51-201	TTCTCTCTTGGTGTGCCTAGAT	CGATGTTGTCATACACTCCGAA
ENSG00000159958	TNFRSF13C	ENST00000291232	TNFRSF13C-201	CCAGAGCCGTCACATCAATAC	GGTCCAGAACTTCCAGATTGTC
ENSG00000176749	CDK5R1	ENST00000313401	CDK5R1-201	GAACCTGGCTGCGAACTG	GTCCACCTCCTCCGAAGAATA
ENSG00000123689	G0S2	ENST00000367029	G0S2-201	TAGAACTGACCTACCACAAGCA	AAGCATTTATCCTTCCTCCCTAGT
ENSG00000170604	IRF2BP1	ENST00000302165	IRF2BP1-201	AACGAGGCAAAAGCATTTAATTCC	AAACCCATCTTTCGGTTTATTGAAG
ENSG00000047644	WWC3	ENST00000380861	WWC3-201	ACAAAGTATGACCCACACCAAAT	ACATCTTCCGATCAATCTCTTGC
ENSG00000261236	BOP1	ENST00000569669	BOP1-205	CAACGTCATCTGTGGGAGC	CCTTCTTGTGGTGTCTCAGC
ENSG00000124145	SDC4	ENST00000372733	SDC4-201	AGACGATGAGGATGTAGTGGG	TATCTAGAGGCACCAAGGGATG
ENSG00000174276	ZNHIT2	ENST00000310597	ZNHIT2-201	ACCTGCCCCAAGAACTCT	TGACCAGTCACAGCTTTATTAATGA
ENSG00000123610	TNFAIP6	ENST00000243347	TNFAIP6-201	CTGTTACTTCACTACAACTGACGAT	GCTGCTCGTTCAAGCCATAT
ENSG00000116157	GPX7	ENST00000361314	GPX7-201	AAATGGTGCTTCAAAGGGAGAG	GTTCGTATCGGCTGGTGATTC
ENSG00000100600	LGMN	ENST00000557434	LGMN-216	CGGCATCTGGATTACGAGTATG	AGGAGGCAGCTCTTCAGTAG
ENSG00000173890	GPR160	ENST00000355897	GPR160-201	TCTCGTCACTGTCCTTTCTATGT	AAGTTATCCTGATAGCCTGTACCA
ENSG00000124942	AHNAK	ENST00000378024	AHNAK-202	CCGAAGTTAGAAGGTGGTGAAG	GAACAGTGACATCCAGTGAAGG
ENSG00000242550	SERPINB10	ENST00000238508	SERPINB10-201	TGCCTGATGACTCTGTGGAT	CTGGTTTGCTTGTAGTCTCGTTTA
ENSG00000146281	PM20D2	ENST00000275072	PM20D2-201	CGCCCGTGAAGGTAGTTG	AGCAGCATTCTCTTGTGATGG
ENSG00000128268	MGAT3	ENST00000341184	MGAT3-201	GGGATGTCTTTGTTGGAGTTGAT	AGAATTGGAAGGTGCGTATGAAG
ENSG00000211898	IGHD	ENST00000390556	IGHD-201	CGTAACACAGGAAGAGGAGGA	TTAGCAGGTAGACGCCAAGA
ENSG00000071537	SEL1L	ENST00000336735	SEL1L-201	CAGCAGCCACCACAGTAATAG	GCAAGTGTTCCCAGCAGATAA
ENSG00000130021	PUDP	ENST00000381077	PUDP-201	CGTGTGGTGGAGTGATTGTC	GTTACAACTGGTTAAGAGGAGCATT
ENSG00000163376	KBTBD8	ENST00000417314	KBTBD8-201	TGGTCTGAGCCTATGCCTATC	GCCATACCCTCCTATCACATAAGTA
ENSG00000069966	GNB5	ENST00000261837	GNB5-201	GCGAGTGAATCTTGTCTCTGTG	AGGAGTCTGTGGTATGTCTGG
ENSG00000121858	TNFSF10	ENST00000241261	TNFSF10-201	CACATTGTCTTCTCCAAACTCCA	GACCAGTTCACCATTCCTCAAG
ENSG00000135842	NIBAN1	ENST00000367511	NIBAN1-201	TCTTCTTAACGGATGGTGACCTATA	ACGATGTAATACTTGGGACTGGA
ENSG00000135074	ADAM19	ENST00000257527	ADAM19-201	GGTGACCAGGTGCTTGTG	TGAGAGCCAGTGAGGGAAAT
ENSG00000126821	SGPP1	ENST00000247225	SGPP1-201	CGCTGGCAGTACCCTCTTA	ATTTGTGAGTTTGGTTGAAGTTGTC
ENSG00000185436	IFNLR1	ENST00000327535	IFNLR1-201	GCTGCTTCGTGGAGGTAAC	CGGAGTGGTTATTTCATACAAGTCT
ENSG00000182742	HOXB4	ENST00000332503	HOXB4-201	TGAGCACGGTAAACCCCAAT	TGTCAGGTAGCGGTTGTAGT
ENSG00000128228	SDF2L1	ENST00000248958	SDF2L1-201	GCGACGACCTGGACCTAT	GGCTTCCATACTGCTCACC
ENSG00000121895	TMEM156	ENST00000381938	TMEM156-203	TCACTTGTTCCATGAAGATCACTTG	TGTCTCTATGACTCTGCCACTT
ENSG00000139193	CD27	ENST00000266557	CD27-201	AGATGTGTGAGCCAGGAACA	GGTGTGGTGGTCAGGAGA
ENSG00000006451	RALA	ENST00000005257	RALA-201	GGCGACAAGGACCGAGTA	AAGGATTAAGAAGAATCTGCACCG
ENSG00000139514	SLC7A1	ENST00000380752	SLC7A1-201	TTGGTCTCTGCTGGGTCTC	AGTATGGTAGGAAGTGGTCAATGTA
ENSG00000171223	JUNB	ENST00000302754	JUNB-201	TTCTACCACGACGACTCATACA	GCTCGGTTTCAGGAGTTTGT
ENSG00000166750	SLFN5	ENST00000299977	SLFN5-201	AGGATCATGGAGAAGATCAGGAAT	TTCTTGCTGAAACTCACCAACTT
ENSG00000196743	GM2A	ENST00000357164	GM2A-201	ACACTTCTGTGATGTGCTTGAC	GCAGTGAGTAGGTTCCTTCTTTG
ENSG00000125910	S1PR4	ENST00000246115	S1PR4-201	CTCGCTCAGCTTTCGGATG	CCATCCACACGCAAGACTG
ENSG00000148154	UGCG	ENST00000374279	UGCG-201	GCTCAGTACATTGCCGAAGATTA	CGTAGTTTGGTCCACCTGATC
ENSG00000132661	NXT1	ENST00000254998	NXT1-201	CCTGGTCTGGAATGGCAATG	CTGATTTGGAACTCGCTGGAA
ENSG00000119333	DYNC2I2	ENST00000372715	DYNC2I2-201	GCTCTCCCTCAAGTATCTGTTTG	CTGCACGTCACCTTTCCC
ENSG00000104140	RHOV	ENST00000220507	RHOV-201	ACCTTCTCTGTGCAAGTCCT	GCAGCCATTTCTCTGTGATGT
ENSG00000183508	TENT5C	ENST00000369448	TENT5C-201	CCTCTTCTATTGCCCAGTTTCC	GACATGCAATCCCTGGTACAG
ENSG00000122435	TRMT13	ENST00000370141	TRMT13-202	ACCACAAAGAGGCAAGATAATCAG	CTAAGAAGCCCAGGCAAACAA
ENSG00000106688	SLC1A1	ENST00000262352	SLC1A1-201	CAGAGTAAATCCCACGACATAAGC	ATTAGCAGAATGACAAGCAGAGG
ENSG00000175606	TMEM70	ENST00000312184	TMEM70-201	GATGTCAGTAGCAAATGGGAGAG	AACAGCAAAGAGCAGTGAGTC
ENSG00000110777	POU2AF1	ENST00000393067	POU2AF1-201	GCGTCCATAAGCCACCATT	TGCTAACAACTCAGTCTCCTACA
ENSG00000090530	P3H2	ENST00000319332	P3H2-201	GGCCTACATCAAGCTTAACCAG	GCTGTCGCCCTGTAATTCTC
ENSG00000121310	ECHDC2	ENST00000539680	ECHDC2-222	CTGTTGCTTCTATGTGGCTGTAT	CTGTGTTGAAATCCTGGTCTGT
ENSG00000198763	MT-ND2	ENST00000361453	MT-ND2-201	CCAAATCTCTCCCTCACTAAACG	CACCTCAACTGCCTGCTATG
ENSG00000160447	PKN3	ENST00000291906	PKN3-201	CCATTCTTCAGGACCACCAAC	GAACTCGCCCTCAAAGTAGC
ENSG00000171155	C1GALT1C1	ENST00000304661	C1GALT1C1-201	CGTTCTAGACGCGGGAAAA	TCCTAATGTGTCCTAGCATAGTGAT
ENSG00000241127	YAE1	ENST00000223273	YAE1-201	GGAACAGACAGCCAGTTTAGTTAA	CCCTACAGTTGAGGTGTTTGATG
ENSG00000080819	CPOX	ENST00000647941	CPOX-204	TCAGAAGAGGACGGTATGTAGAATT	CTCCCATCGGGCAGTTAGA
ENSG00000154165	GPR15	ENST00000284311	GPR15-201	AGCAATCAGGAAAGCACAACA	GTCCACTCACCTCCATACCA
ENSG00000164237	CMBL	ENST00000296658	CMBL-201	ACCTTGTGGCTCTCATCTGA	CCCTCTGTTCTCTGGATCTGTAA
ENSG00000162511	LAPTM5	ENST00000294507	LAPTM5-201	CAACTCTGGCGAATGTAGGAC	CTGAATAGGTGAGCATTGGATTGT
ENSG00000167258	CDK12	ENST00000447079	CDK12-202	TCTTCAACTGTCCATAGGAACGATA	GTGCTAACTGCCCTGCTTT
ENSG00000141582	CBX4	ENST00000269397	CBX4-201	AGTTCAAGCCCTTCTTTGG	CACCGTCACGTACTCCTT
ENSG00000108828	VAT1	ENST00000355653	VAT1-201	GTGCCAAGGTTAGCCAGTC	CAGGGACGGGAGGAAAGAT
ENSG00000169100	SLC25A6	ENST00000381401	SLC25A6-201	GGAGCCAAGTCGTGTTCTAAG	CTCTGCGTCCTCTGTTTATTGTT
ENSG00000137642	SORL1	ENST00000260197	SORL1-201	TTAGAGAAGGCATCCAGAGACATAA	CAGCACACACTCCAGTTAAGAAA
ENSG00000148459	PDSS1	ENST00000376215	PDSS1-201	TGTCGTATATCACGGTTTCATCAC	GGCTTTCCCTTTCCCATCAAA
ENSG00000129625	REEP5	ENST00000379638	REEP5-202	GTTGCTGGCAGTCTAAGTGTAA	CAGGCACAGGCTCAATTAGTT
ENSG00000173674	EIF1AX	ENST00000379607	EIF1AX-202	ATTCTATGGAGTTCGTGAACACATC	CAAGGCTGGTTTCTTATGAGGATT
ENSG00000152492	CCDC50	ENST00000392456	CCDC50-202	GCAGAGAGACGACGCATTC	GGCTTCATTCCTCCATCTTCATAA
ENSG00000125869	LAMP5	ENST00000246070	LAMP5-201	ATGCTCTTTGTAAAGGAAAGCCA	ACTGACTGCGTCTTTGAAGTG
ENSG00000086289	EPDR1	ENST00000199448	EPDR1-201	TGATCCCCTGCAAGAGATTATTTG	GCTTGGTGGCTTGGTCAA
ENSG00000104154	SLC30A4	ENST00000261867	SLC30A4-201	TCTGGTCACCGTCACTCC	TTGTATTCTGGCTTGAATCGTATGA
ENSG00000135119	RNFT2	ENST00000257575	RNFT2-201	GTAGAGGCGAGGACTTATTATGTTG	GTAATTCCAGCACTCAGCACTT
ENSG00000160683	CXCR5	ENST00000292174	CXCR5-201	ACAGATTGGACAACTATAACGACAC	AGGAAGATGAGGCTGTAGGC
ENSG00000188171	ZNF626	ENST00000291750	ZNF626-201	ACCTGGTCTTCCTTGGTATTACT	CCACACTGTGCAGTCTCTTATATG
ENSG00000118985	ELL2	ENST00000237853	ELL2-201	CAACGCCAGAATTATAAGGATGACT	TGGGACTAGACTGCTTTATCTTCT
ENSG00000051341	POLQ	ENST00000264233	POLQ-201	GGACACAGTAGGCGAGAGTAT	TGCGAACAGGCTTTAGAGAAC
ENSG00000141570	CBX8	ENST00000269385	CBX8-201	CGCATACGGAAAGGACGC	CGGTTCCCATGTGCTGTAC
ENSG00000139269	INHBE	ENST00000266646	INHBE-201	TGATTTCCTGCCCTAAGTCCT	ACCATCTATCTGCTTCCTCCTC
ENSG00000145386	CCNA2	ENST00000274026	CCNA2-201	CCTTAGGGAAATGGAGGTTAAATGT	GCTCTCATACTGTTAGTGATGTCTG
ENSG00000129911	KLF16	ENST00000250916	KLF16-201	AGGTGGCTCTCAGGATGG	GCACAGATGGGAAGAAAGTTAGTAT
ENSG00000110042	DTX4	ENST00000227451	DTX4-201	GCCAAGACACGGGAACTC	GGTGCTGCTTCTCATAGGC
ENSG00000114446	IFT57	ENST00000264538	IFT57-201	GTGAGGCAAAGGAGCGATAC	CACCAAAGGAGCACCATCAG
ENSG00000170396	ZNF804A	ENST00000302277	ZNF804A-201	TAAGCACCAGGAGTTTGACAATC	ACTTCCAGGAGCACATACAGT
ENSG00000181788	SIAH2	ENST00000312960	SIAH2-201	GTCCTGTTTCCCTGTAAGTATGC	TTCATGTTCTGGTTTCTCCGTATG
ENSG00000177459	ERICH5	ENST00000318528	ERICH5-201	CCAACGCATTGAAGGTGAGA	CTATCTATGTGGCTGCTGAAAGG
ENSG00000185442	FAM174B	ENST00000327355	FAM174B-201	TTCTCTACTGGATCTACACATTGGA	CCTTGAACTCTGACACAGGTAAC
ENSG00000197405	C5AR1	ENST00000355085	C5AR1-201	CACACACCATCTTTCCAT	GTTCACACCTATTGCCATA
ENSG00000198855	FICD	ENST00000552695	FICD-204	GTGCCAATATGACTGCTGCTAT	AAGAGACAACACTGCGTATTCG
ENSG00000100290	BIK	ENST00000216115	BIK-201	CCCGAGATAGTGCTGGAACA	GGTGACAATTGCAGAGCCATA
ENSG00000167747	C19orf48	ENST00000597705	C19orf48-207	CGCTTCGGAGAGAGAAATGC	TGGAGGGATGCTGGATAGG
ENSG00000188816	HMX2	ENST00000339992	HMX2-201	TCTTATTTATGGTCTCTGCCCTACT	AAGCGTACTGGTTCGGTCTA
ENSG00000111885	MAN1A1	ENST00000368468	MAN1A1-201	ATGTATCAGTTGGAGGACTTGGA	TCTCGATAGCCTGAACAGCAT
ENSG00000198804	MT-CO1	ENST00000361624	MT-CO1-201	CCGCTACCATAATCATCGCTATC	TTGCTAATACAATGCCAGTCAGG
ENSG00000110852	CLEC2B	ENST00000228438	CLEC2B-201	GCAACTAAAACAGGGTAGACAGG	TGTGTGACAGTGGTGGGTAA
ENSG00000110092	CCND1	ENST00000227507	CCND1-201	CATCTCTGTACTTTGCTTGCTCATA	ACGCTACGCTACTGTAACCA
ENSG00000188620	HMX3	ENST00000357878	HMX3-201	GACCTGAAGCCTCGGAGAA	TTCCTCGGAGTCGCTCTC
ENSG00000180828	BHLHE22	ENST00000321870	BHLHE22-201	CTTGGTTATTAAGCCTGGAGAGTG	GTGCCCTTTCTGATTTGTCTGA
ENSG00000159212	CLIC6	ENST00000349499	CLIC6-201	CTCTTCGTCAAGGCTGGTTATG	GTCTGCGGGTTTCCTTTTCA
ENSG00000163257	DCAF16	ENST00000382247	DCAF16-201	GCACCTCTGAAGTCTTCTCATTC	CTTGCTTGTCCGCTGGTATAG
ENSG00000134061	CD180	ENST00000256447	CD180-201	GGATCAGATGTGCATTGAGAAAGA	GTCTGCTGAAGGTTCTATTGTGAA
ENSG00000021355	SERPINB1	ENST00000380739	SERPINB1-201	GCCTGAAGAAGATTGAGGAACA	GAGGTCGGAGTTGAGAGTGTA
	C1ORF43			GCTCCTACCTGCTGGATCTG	CCATAGCGGGCTGTTTCATAG
ENSG00000108175	ZMIZ1	ENST00000334512	ZMIZ1-201	CAGCAGCCATCCACACAG	GAGACAGGAGGTCATCGTTACTA	AGCCTTCGCTGGATCTCCTTCCCGA
ENSG00000147872	PLIN2	ENST00000276914	PLIN2-201	GATCCCTGTCTACCAAGCTTCA	GGCAAATTCAATCAGGTGAACAGTA	CCTACCAGCAGGCTCTCAGCAGGGTT
ENSG00000052795	FNIP2	ENST00000264433	FNIP2-201	CACGAGTCCATGTGAAAGAATTAGG	GGCAATAGCAGTCAACAGAGG	CGTACTGGGGATTGAATCCAACGACCT
ENSG00000182013	PNMA8A	ENST00000313683	PNMA8A-201	CGAAGGCCAAGCCAGAAG	CTTCCTTGTTCTTTCAACTCCTCAG	CTCCTCGGCGTGCCACCAATGAATCCA
ENSG00000180543	TSPYL5	ENST00000322128	TSPYL5-201	CCAACTGATCCTGCACAAGTC	GGTCTATAGTACACAGAGGCCAAC	CCTCCTGCTGGGCTGCTCCTGGTTG
ENSG00000102317	RBM3	ENST00000376759	RBM3-203	ACCTGGCTAATACTGAGCTAAGTTA	GCCTCCAGGACTGGAACTAA	CCACAACGCACCAGCAAGGGAATAGGC
ENSG00000132463	GRSF1	ENST00000254799	GRSF1-201	GATGGATGGGTAAGGTTGAAAGG	CATCCACCTTAGCAATCACTTACG	TCTTCTTGGCACGCTACAGGCTGAGTT
ENSG00000166451	CENPN	ENST00000299572	CENPN-201	GGGACCTGAGGAGGAACAA	GCTACTGCCGCTTCAGTTC	CCTGGACTCCCGAGACTCACCCGACT
ENSG00000127663	KDM4B	ENST00000588361	KDM4B-206	TCCTGCCTGGTTTATCTTCCC	ACCCTGCCAGACTGATCTG	CCACCTCCACGCAAGCCTGAATGTCAA
	C1ORF43			CGTTCCTTAATGGGCAAGAA	AAGGGTATCAATGAGTGCTTTG	TTCCGCTCCTACCTGCTGGATCTGC

## Sheet: AS event validation
Supplementary Data 4. Primers and probes for isoform-level RT-qPCR validation.
ASE	GeneID	Gene	Event_Type	Condition	Forward primer	Reverse primer	Probe
ENSG00000110060.9;SE:11:125895789-125895907:125896330-125903170:-	ENSG00000110060.9	PUS3	SE	Inclusion form	GTGCCTTTGGACAGGTGATC	AGCAGCATTAGCCTCCTCTT
ENSG00000110060.9;SE:11:125895789-125895907:125896330-125903170:-	ENSG00000110060.9	PUS3	SE	Exclusion form	GGCTGCCGGAAAGTGATC	GGATGTCTGGAGGGAGTACC
ENSG00000164751.15;SE:8:76986296-76988307:76988338-76999990:-	ENSG00000164751.15	PEX2	SE	Inclusion form	TGTCTCTGAGCTTCTGGCA	CCTCAAGACTGGACAGCCTATA
ENSG00000164751.15;SE:8:76986296-76988307:76988338-76999990:-	ENSG00000164751.15	PEX2	SE	Exclusion form	GCTTTCCAGAGAATGTTTCAGAGA	CATACTTGCCAGAAGCTTAGGAG
ENSG00000005486.17;SE:7:75879260-75881365:75881486-75881829:+	ENSG00000005486.17	RHBDD2	SE	Inclusion form	GCAAGCCACTATGGAAGGAG	GTTACCAGCCTGTAAACTCACTG
ENSG00000005486.17;SE:7:75879260-75881365:75881486-75881829:+	ENSG00000005486.17	RHBDD2	SE	Exclusion form	TTCGCAACTGGCAAGTTTACA	ACAGGAAGATGATAGCGGAGAA
ENSG00000104427.13;SE:8:78698513-78711990:78712106-78715221:+	ENSG00000104427.13	ZC2HC1A	SE	Inclusion form	CCTCATGCAGGTAATATGGACAAG	AAACTAGGTGGTGTGGAATTTCG
ENSG00000104427.13;SE:8:78698513-78711990:78712106-78715221:+	ENSG00000104427.13	ZC2HC1A	SE	Exclusion form	TGGGAAACAAACTTCAGACCTTATC	GGTTTGACATTAGCTCCTGCAT
ENSG00000100281.14;SE:22:35263874-35263982:35264096-35264648:+	ENSG00000100281.14	HMGXB4	SE	Inclusion form	AAGCACTCCTCTGATGATTACTACT	ATTCCAAAGACGAAATATCTGGTGT
ENSG00000100281.14;SE:22:35263874-35263982:35264096-35264648:+	ENSG00000100281.14	HMGXB4	SE	Exclusion form	TTCTTGGGGACGGACACA	TCCAAAGACGAAATATCTCCATAGT
ENSG00000082258.13;RI:2:134953230:134954379-134954481:134959342:+	ENSG00000082258.13	CCNT2	RI	Inclusion form	TTCATCTAGTTCTTCCTCCTCTGTT	CCGTAGCCCACCTGGTAT
ENSG00000082258.13;RI:2:134953230:134954379-134954481:134959342:+	ENSG00000082258.13	CCNT2	RI	Exclusion form	TGAGCAGTGATGGCATTTCC	CCGTAGCCCACCTGAACT
ENSG00000145495.16;RI:5:10400784:10400842-10402059:10402139:+	ENSG00000145495.16	MARCHF6	RI	Inclusion form	TGAACAGTTACTTCTAGTGGTAGGA	TAATACAACAGCCTGCCCTCTA
ENSG00000145495.16;RI:5:10400784:10400842-10402059:10402139:+	ENSG00000145495.16	MARCHF6	RI	Exclusion form	CATTTTGCCCTTACCATATTGGTC	AATGAGATGCTTGGACGTGTTC
ENSG00000167635.12;SE:19:36215196-36218122:36218195-36228748:+	ENSG00000167635.12	ZNF146	SE	Inclusion form	GCGAAAGTAGGAGGAAGACATAG	CTTCTTGCTTCAACAGAGGATCAT
ENSG00000167635.12;SE:19:36215196-36218122:36218195-36228748:+	ENSG00000167635.12	ZNF146	SE	Exclusion form	GCGCGAAAGTAGGAGTTAATATGA	TTCCCACTTCTTTCTCCACCATA
ENSG00000089248.7;SE:12:112013609-112019756:112019894-112022150:+	ENSG00000089248.7	ERP29	SE	Inclusion form	GGTCACTTTCTACAAGGTCATTCC	CGCTTGAACTCATCCTGCTT
ENSG00000089248.7;SE:12:112013609-112019756:112019894-112022150:+	ENSG00000089248.7	ERP29	SE	Exclusion form	ACGGTCACTTTCTACAAGATTATGG	TGTATGGGACTGGGTTCTCAA
ENSG00000025156.13;SE:6:122423686-122427903:122427956-122431430:+	ENSG00000025156.13	HSF2	SE	Inclusion form	GATCTCCTGGTTGATCTTTTCACT	CCGAAACTGGCTGAACTACATT
ENSG00000025156.13;SE:6:122423686-122427903:122427956-122431430:+	ENSG00000025156.13	HSF2	SE	Exclusion form	AGATCTCCTGGTTGATTCTGAGAA	CTCTTCCGAAACTGGCTGAAC
ENSG00000136754.18;SE:10:26751783-26759062:26759235-26765218:-	ENSG00000136754.18	ABI1	SE	Inclusion form	TGGCACGAAGAGAGATTGGTA	GGTTATTTCCATGCTTGGCTTTTAG
ENSG00000136754.18;SE:10:26751783-26759062:26759235-26765218:-	ENSG00000136754.18	ABI1	SE	Exclusion form	CATGGTGTCAAGCATGGAAATAAC	TTGGCGGTTTCTGAGTAGGA
ENSG00000074266.23;SE:11:86268561-86270083:86270157-86276980:+	ENSG00000074266.23	EED	SE	Inclusion form	TTCGCCAGCATTTGTCTTGT	GCCAGAAATCCATAGAAAACCTCA
ENSG00000074266.23;SE:11:86268561-86270083:86270157-86276980:+	ENSG00000074266.23	EED	SE	Exclusion form	TCTACCAGAGACATACATAGGAATT	AATGGCATTTTCACAAGACTTAGAA
ENSG00000134884.15;RI:13:106557048:106557131-106559432:106559657:-	ENSG00000134884.15	ARGLU1	RI	Inclusion form	GGAGTAATGGTGCTGTCTTGTAG	AGAGGGTTGTGTCCGTGTAA
ENSG00000134884.15;RI:13:106557048:106557131-106559432:106559657:-	ENSG00000134884.15	ARGLU1	RI	Exclusion form	GCACGAAGAGTAGAAGAATTGGTAG	CGTTCTTCCTCCTCTCTAGCTT
ENSG00000261740.7;A3:16:29447026-29454016:29446922-29454016:-	ENSG00000261740.7	BOLA2-SMG1P6	A3	Inclusion form	CTTCAGAGACACAGGTTCTGTAC	AAACACCAACACACTCATTAGCA
ENSG00000261740.7;A3:16:29447026-29454016:29446922-29454016:-	ENSG00000261740.7	BOLA2-SMG1P6	A3	Exclusion form	CTTCAGAGACACAGCTTGGATC	GGCAATTCTCCAGTTGGTCTAAT
ENSG00000180573.10;A5:6:26124749-26138054:26124633-26138054:+	ENSG00000180573.10	H2AC6	A5	Inclusion form	AACAAGAAGACTCGCATCATCC	CTTTTGCAACCTGTCAAATCACTT
ENSG00000180573.10;A5:6:26124749-26138054:26124633-26138054:+	ENSG00000180573.10	H2AC6	A5	Exclusion form	AAGACCGAGAGTCACCACAA	TGAGAAGCTTTTGCAACCTTAGT
ENSG00000106245.11;A5:7:99409245-99410034:99409004-99410034:+	ENSG00000106245.11	BUD31	A5	Inclusion form	TACCTTGGCAACGGCTGA	CTGGTCCTGTTTCTTCAGAGG
ENSG00000106245.11;A5:7:99409245-99410034:99409004-99410034:+	ENSG00000106245.11	BUD31	A5	Exclusion form	CAGGAGCTTCCGAAGAAACAG	TCCAAGAGTATAGACAGCAGAAAGA
ENSG00000107949.17;AL:10:125833946-125836104:125836551:125833946-125841255:125842805:+	ENSG00000107949.17	BCCIP	AL	Inclusion form	TAAGACATTTGTGGAAGCAGGAAA	AACTTGAGAATTGCCTTCTCATAGA
ENSG00000107949.17;AL:10:125833946-125836104:125836551:125833946-125841255:125842805:+	ENSG00000107949.17	BCCIP	AL	Exclusion form	CAATGTCTAGCATCCAGTAG	GAGATCCAGGTCAGTTGT
ENSG00000204576.12;MX:6:30557450-30558150:30558212-30561834:30557450-30561328:30561508-30561834:+	ENSG00000204576.12	PRR3	MX	Inclusion form	GGAAGAGACTGGAGATGAGGAG	TCTGTGAAGAGCTGACTTAGGG
ENSG00000204576.12;MX:6:30557450-30558150:30558212-30561834:30557450-30561328:30561508-30561834:+	ENSG00000204576.12	PRR3	MX	Exclusion form	GAGTCCCATCGCCCCAAA	CCTGTAGCAGCAGTTCATTCATT
ENSG00000157869.16;MX:4:13368650-13369871:13369965-13376545:13368650-13371795:13371867-13376545:-	ENSG00000157869.16	RAB28	MX	Inclusion form	AGAAAGTTGCTGCTGAAATCCT	CCACCCTCTGCACTACTGTA
ENSG00000157869.16;MX:4:13368650-13369871:13369965-13376545:13368650-13371795:13371867-13376545:-	ENSG00000157869.16	RAB28	MX	Exclusion form	AGAAAGTTGCTGCTGAAATCCT	AAATAATGAAATGGCCCTGTGACT
ENSG00000189046.11;A3:12:109092937-109093247:109092787-109093247:-	ENSG00000189046.11	ALKBH2	A3	Inclusion form	CGTCTCGCTTCTGAATCGTATC	AAACCATGTCCTCGCTGC
ENSG00000189046.11;A3:12:109092937-109093247:109092787-109093247:-	ENSG00000189046.11	ALKBH2	A3	Exclusion form	CGTCTCGCTTCTGAATCGTATC	GAATCTGTCCATCCTCGCTG
ENSG00000146410.12;A5:6:136249153-136249976:136249153-136250264:-	ENSG00000146410.12	MTFR2	A5	Inclusion form	GCATCGTTACCGCCTGTG	TTGGTGCCTTCCTCCGAA
ENSG00000146410.12;A5:6:136249153-136249976:136249153-136250264:-	ENSG00000146410.12	MTFR2	A5	Exclusion form	CTAGGGACTAGCAGGCACC	CAGTATGAGAGACATTGATGAAGCA
ENSG00000105856.14;A5:7:107169185-107179879:107169027-107179879:+	ENSG00000105856.14	HBP1	A5	Inclusion form	ACTTCGCGGCAGTCAGAG	TTCATCACAGGAGTTATATCCAGGT
ENSG00000105856.14;A5:7:107169185-107179879:107169027-107179879:+	ENSG00000105856.14	HBP1	A5	Exclusion form	GCGACGGGTTTGTCAGAG	ACAGGAGTTATATCCAGGTGAAGAT
ENSG00000104976.13;AF:19:7920338:7920549-7921423:7921015:7921119-7921423:+	ENSG00000104976.13	SNAPC2	AF	Inclusion form	TTACAGCGCCTGCCTCTT	AAGACCCGGATCTCAGCC
ENSG00000104976.13;AF:19:7920338:7920549-7921423:7921015:7921119-7921423:+	ENSG00000104976.13	SNAPC2	AF	Exclusion form	CGGAATGAACTGGGAGTAAGATG	ACCCGGATTTCAAGCTCGTA
ENSG00000112561.19;AF:6:41691235-41705647:41705940:41691235-41723461:41723726:-	ENSG00000112561.19	TFEB	AF	Inclusion form	CCCTCCCTAGTTGATGGTTCT	GCTGGCTCCCTCTTTCAC
ENSG00000112561.19;AF:6:41691235-41705647:41705940:41691235-41723461:41723726:-	ENSG00000112561.19	TFEB	AF	Exclusion form	CCTCTCGAAGGGAGCCAG	GCATGACAGAATGTTGCT
ENSG00000138413.14;AF:2:208253959-208254031:208254322:208253959-208254343:208254458:-	ENSG00000138413.14	IDH1	AF	Inclusion form	AAATTGTGCTCCCATGACCTTT	GTAGTTTATCGCCTGCCAGAC
ENSG00000138413.14;AF:2:208253959-208254031:208254322:208253959-208254343:208254458:-	ENSG00000138413.14	IDH1	AF	Exclusion form	GCCTGGAGTTTAAAAGGCGATA	CTTGCATCTCTACCACAGAACC
ENSG00000112029.10;AF:6:152975621-152982857:152983041:152975621-152983234:152983579:-	ENSG00000112029.10	FBXO5	AF	Inclusion form	ACCCTCGGATAGTTGTAAAGAAGA	ACCCAATACATGACAGCCTTTC
ENSG00000112029.10;AF:6:152975621-152982857:152983041:152975621-152983234:152983579:-	ENSG00000112029.10	FBXO5	AF	Exclusion form	TGGGGAGCCGGTTGTAAA	CTAGTCTTCCAATGTCATCAGGTTT
ENSG00000125449.7;AL:17:75110606-75114169:75114826:75110606-75128677:75130272:+	ENSG00000125449.7	ARMC7	AL	Inclusion form	TCGCCAACTTCGCTTATGAC	TGCAGCAGCAATAGCAAACT
ENSG00000125449.7;AL:17:75110606-75114169:75114826:75110606-75128677:75130272:+	ENSG00000125449.7	ARMC7	AL	Exclusion form	GTGGAGTTTGCTATTGGAGGC	GGATAGGCAGTTGATGATGAGTG
ENSG00000134779.15;AL:18:36777647:36780188-36798449:36786573:36787079-36798449:-	ENSG00000134779.15	TPGS2	AL	Inclusion form	CACAGGCCAAGCCCAAAG	ACAGATTGTTTACCTGTTGTGGATT
ENSG00000134779.15;AL:18:36777647:36780188-36798449:36786573:36787079-36798449:-	ENSG00000134779.15	TPGS2	AL	Exclusion form	CTATTACCGCCTGCTCATCAC	ATTATAAGTTATCTTGGCCTGTGGG
ENSG00000166130.15;SE:12:98614340-98634296:98634413-98644523:-	ENSG00000166130.15	IKBIP	SE	Inclusion form	CTGGTTTGTATTTCAGCAGTCAGA	GCTTCAGATTTCTGCCACTTTTC
ENSG00000166130.15;SE:12:98614340-98634296:98634413-98644523:-	ENSG00000166130.15	IKBIP	SE	Exclusion form	CCTGGCCTGTGGCAGAAAT	TCTTCCTGTAGACGCTTTAGATGAG
ENSG00000091972.18;A3:3:112345288-112347558:112345288-112347563:+	ENSG00000091972.18	CD200	A3	Inclusion form	GGATGGAGAGGCTGGTGAT	CCACTTGCACTTGTGCTGT
ENSG00000091972.18;A3:3:112345288-112347558:112345288-112347563:+	ENSG00000091972.18	CD200	A3	Exclusion form	TGGAGAGGCTGTGCAAGT	TGGTTCTCGCTGAAGGTGA
ENSG00000104290.11;SE:8:28494343-28499933:28499978-28502670:+	ENSG00000104290.11	FZD3	SE	Inclusion form	GCCGGGGTCTGAGGATAG	ATTCCCAAACCACAGATTCCATC
ENSG00000104290.11;SE:8:28494343-28499933:28499978-28502670:+	ENSG00000104290.11	FZD3	SE	Exclusion form	GCCGGGGTCTGAGATATTTC	ATCAACCACATTCCCAAACCA
ENSG00000151135.10;SE:12:106956065-106957082:106957149-106967111:+	ENSG00000151135.10	TMEM263	SE	Inclusion form	CGCCTCAGCTCTCCTCTG	CATGATCTCCTGTTGGTGTTGTAT
ENSG00000151135.10;SE:12:106956065-106957082:106957149-106967111:+	ENSG00000151135.10	TMEM263	SE	Exclusion form	GACCCCGGCGGAGATCAT	ACCAATCCAAGCCACACCA
ENSG00000106682.16;SE:7:74189918-74190247:74190306-74194741:+	ENSG00000106682.16	EIF4H	SE	Inclusion form	GGATGACTTCAATTCTGGCTTCA	CCTCTTCTGTGGGTTCTCTGA
ENSG00000106682.16;SE:7:74189918-74190247:74190306-74194741:+	ENSG00000106682.16	EIF4H	SE	Exclusion form	GGAAGCCTTGACATACGATGG	TCATCCCTGAAGCCTCTGTC
ENSG00000072694.22;SE:1:161674073-161675257:161675313-161677328:+	ENSG00000072694.22	FCGR2B	SE	Inclusion form	GGATCATTGTGGCTGTGGTC	ATTAGTGGGATTGGCTGGTTTC
ENSG00000072694.22;SE:1:161674073-161675257:161675313-161677328:+	ENSG00000072694.22	FCGR2B	SE	Exclusion form	AAAGCGGATTTCAGCCAATC	GCAAGACAATGGAGACTAAATACG
ENSG00000166797.11;SE:15:64075537-64081102:64081151-64088687:-	ENSG00000166797.11	CIAO2A	SE	Inclusion form	GGAAGTGGTCTCGGAAAGTTG	TTAAGCACAGCCCAATAAGAGTC
ENSG00000166797.11;SE:15:64075537-64081102:64081151-64088687:-	ENSG00000166797.11	CIAO2A	SE	Exclusion form	GGACCCAGAAAAGCCCAATAC	GATTTCCAACAATAAGAGTCGCCAA
ENSG00000159445.13;SE:1:151889373-151889983:151890214-151895008:-	ENSG00000159445.13	THEM4	SE	Inclusion form	AACAAGGACCTAAGACTGCTCT	GGCCATTAACCAGGCAAGAA
ENSG00000159445.13;SE:1:151889373-151889983:151890214-151895008:-	ENSG00000159445.13	THEM4	SE	Exclusion form	CAAAACCCATTTTCTTGACCCAAA	GCACCTCCATGAATGAATCCA
ENSG00000162642.14;SE:1:85258722-85258935:85259061-85259358:-	ENSG00000162642.14	C1orf52	SE	Inclusion form	ACAATCCGCTCAACAAACAGAT	TCCTTTGGAGGCAAAGAAGAATC
ENSG00000162642.14;SE:1:85258722-85258935:85259061-85259358:-	ENSG00000162642.14	C1orf52	SE	Exclusion form	GCCTGAGGAGCCTCCAAA	TTCTTCTCAGTGGTGTAGGTCTC
ENSG00000152422.16;A5:5:83077662-83104910:83077615-83104910:+	ENSG00000152422.16	XRCC4	A5	Inclusion form	CGGAAGTAGAGTCACGGA	CTCTCCATTTCTTAATACCTCAGAT
ENSG00000152422.16;A5:5:83077662-83104910:83077615-83104910:+	ENSG00000152422.16	XRCC4	A5	Exclusion form	GTAGAGTCACGGAGAGGTATTAAGA	GTTATACTGGGTTCAGAAACAAGGT
ENSG00000198919.13;A5:3:108634972-108636616:108634958-108636616:+	ENSG00000198919.13	DZIP3	A5	Inclusion form	CCTTCCATAATCTTTCCTGCCATAA	CCTTCCCACATCCACTTCAAC
ENSG00000198919.13;A5:3:108634972-108636616:108634958-108636616:+	ENSG00000198919.13	DZIP3	A5	Exclusion form	AGAAGAACTAAGTCCACCTCTCA	CCTTTGTTTACTCTTAACTTCCTGG
ENSG00000116701.16;MX:1:183570839-183573185:183573292-183577599:183570839-183574487:183574621-183577599:-	ENSG00000116701.16	NCF2	MX	Inclusion form	AACGAGGGATGCTCTACTACC	CTCATATAGCTTCTGCTTCTCACAG
ENSG00000116701.16;MX:1:183570839-183573185:183573292-183577599:183570839-183574487:183574621-183577599:-	ENSG00000116701.16	NCF2	MX	Exclusion form	ATGTATGCCAAGAAGGAGGAATG	CCACGACCCAGACACACT
ENSG00000238227.8;RI:9:136114589:136114950-136115456:136117024:-	ENSG00000238227.8	TMEM250	RI	Inclusion form	AGGAGCCATGAGGACAGTT	TCATCAGAGGTCATCCACAGAA
ENSG00000238227.8;RI:9:136114589:136114950-136115456:136117024:-	ENSG00000238227.8	TMEM250	RI	Exclusion form	AGGGAACACCGTCAAAGAAAG	ACAGAAGCTGGGGCTCTAA
ENSG00000196652.12;SE:7:99519909-99520169:99520304-99525813:+	ENSG00000196652.12	ZKSCAN5	SE	Inclusion form	CTTCCTGTTCTCCAAGTTCCTTC	ATTTTCACCAACTTCTGGGACC
ENSG00000196652.12;SE:7:99519909-99520169:99520304-99525813:+	ENSG00000196652.12	ZKSCAN5	SE	Exclusion form	CTTCCTGTTCTCCAAGTTCCTTC	CCTGGACTCATAACCTGGGA
		C1ORF43			GCTCCTACCTGCTGGATCTG	CCATAGCGGGCTGTTTCATAG
ENSG00000197451.12;SE:5:178209447-178210132:178210272-178210553:+	ENSG00000197451.12	HNRNPAB	SE	Inclusion form	CCCAGCCCAAAGAAGTCTA	TCCAGTAGTTGCCGTAGC	TCTGACTCTGACCTCCACCTCCACCA
ENSG00000197451.12;SE:5:178209447-178210132:178210272-178210553:+	ENSG00000197451.12	HNRNPAB	SE	Exclusion form	CCCAGCCCAAAGAAGTCTA	CCTCAGTATGGCTTGTAGTTATTC	TGGTGGAGGTGGAGGTCAGGGTAGT
ENSG00000106603.20;MX:7:43648652-43650493:43650712-43729429:43648652-43665658:43665722-43729429:-	ENSG00000106603.20	COA1	MX	Inclusion form	GGAAGCCGTGTCAAATATGTG	GCCACATCATAGCACAACTC	TGCCTAGTGAATGACAGACAACTTGCC
ENSG00000106603.20;MX:7:43648652-43650493:43650712-43729429:43648652-43665658:43665722-43729429:-	ENSG00000106603.20	COA1	MX	Exclusion form	CCTGGAAGAACTCGTCATG	CCACATCATAGCACAACTCTC	CAGCCATGTGGAACTGACAACTTGCCT
ENSG00000164920.10;A3:8:98950755-98951519:98950755-98951601:+	ENSG00000164920.10	OSR2	A3	Inclusion form	CAGTCTAGAACTCTAGCAGTTCA	GGTGAGAAGGTGAGTTTTCAG	TGCAGGAATCTCCACACAAATGTCCCA
ENSG00000164920.10;A3:8:98950755-98951519:98950755-98951601:+	ENSG00000164920.10	OSR2	A3	Exclusion form	CAGTCTAGAACTCTAGCAGTTCA	TTCGCCTGAACACTTTGC	ACACATGCAGACATCAAGCCCTACAGC
ENSG00000179344.17;SE:6:32660249-32660859:32660882-32661347:-	ENSG00000179344.17	HLA-DQB1	SE	Inclusion form	GTCAGAAAGGACCTCAAGGG	GGCATAAGCAGGCATCAC	AGGGCTTCTGCACTGACTCCTGAGAC
ENSG00000179344.17;SE:6:32660249-32660859:32660882-32661347:-	ENSG00000179344.17	HLA-DQB1	SE	Exclusion form	GGCCTTATCATCCGTCAAAG	GGCATAAGCAGGCATCAC	AAGGGCTTCTGCACTGACTCCTGAGAC
ENSG00000104312.8;SE:8:89758233-89762829:89762982-89765341:+	ENSG00000104312.8	RIPK2	SE	Inclusion form	GAAGCACCTGCACATCCA	TTGGCATGTATTCAGTAACTATTCC	ACTCCGCTGCTCGACAGTGAAAGAAAG
ENSG00000104312.8;SE:8:89758233-89762829:89762982-89765341:+	ENSG00000104312.8	RIPK2	SE	Exclusion form	CGCTGCTCGACAGAAAAC	GCAGGTAATTTACACCAAGGG	AATCTCAATGGCCAAGCAACATCAGGA
ENSG00000128050.9;SE:4:56441860-56446357:56446377-56446695:+	ENSG00000128050.9	PAICS	SE	Inclusion form	CTACGAATTGTTAGACAGTCCAG	GAAGGCAGTTTTAATACGATTTGAC	CAGTCCAAGGACCAGATTACAGCAGGA
ENSG00000128050.9;SE:4:56441860-56446357:56446377-56446695:+	ENSG00000128050.9	PAICS	SE	Exclusion form	CTACGAATTGTTAGACAGTCCAG	AGGCAGTTTTAATACCTGCTTC	CAGTCCAAGGACCAGATTACAGCAGGA
ENSG00000152795.18;SE:4:82424883-82425563:82425667-82426037:-	ENSG00000152795.18	HNRNPDL	SE	Inclusion form	GCAAGGCATACACCAGAA	AGACCAATCTTCAATGTCGTC	AACATCTCCTCCACAGGACAGCGT
ENSG00000152795.18;SE:4:82424883-82425563:82425667-82426037:-	ENSG00000152795.18	HNRNPDL	SE	Exclusion form	TGGAGAAAACAGGAGGAGATG	CACAGATAGCAAAGGACAAAGTAA	AACCCATCTTGCAGGACGACATTGAAG
ENSG00000116679.16;SE:1:185305643-185306485:185306625-185307014:-	ENSG00000116679.16	IVNS1ABP	SE	Inclusion form	GAACGATGATGATTTAATGGTTCAA	TCTGCACAAACTGAATGTGG	TGCCAAACACCTCAGCCTGTCCATCT
ENSG00000116679.16;SE:1:185305643-185306485:185306625-185307014:-	ENSG00000116679.16	IVNS1ABP	SE	Exclusion form	AGCTGATGGAAGAGGTTCAA	GGTCATCATCACTGCCAAAC	CCTCAGCCTGTCCATCTAGTAGGTTCC
ENSG00000118096.10;SE:11:118557045-118557738:118557890-118559785:-	ENSG00000118096.10	IFT46	SE	Inclusion form	GTCTCAAGTGCCACCAGA	GTGTCAACTGTGAGGTCTTC	TCTCCTTTCTGTGCTTCTGGCTCTCTC
ENSG00000118096.10;SE:11:118557045-118557738:118557890-118559785:-	ENSG00000118096.10	IFT46	SE	Exclusion form	CAAGGCTATGGCTGATAA	TGCTCTTCATCATCATCA	ACTGTGAGGTCTTCTTCTTCTCCTTGT
ENSG00000169981.11;SE:3:44651259-44652557:44652701-44658701:+	ENSG00000169981.11	ZNF35	SE	Inclusion form	TGGGATATGGCGGTAGTC	CTTGGTTTCAGCACCTAGAAA	ACCTGCTGCTTCAACCCTTGGC
ENSG00000169981.11;SE:3:44651259-44652557:44652701-44658701:+	ENSG00000169981.11	ZNF35	SE	Exclusion form	GCCCAGTGAAGGTGAAAA	CTTGGTTTCAGCACCTTTTC	AAACTTCCCAGGTCAGGCATCCAGC
ENSG00000128595.17;MX:7:128748804-128754262:128754455-128758871:128748804-128754529:128754722-128758871:+	ENSG00000128595.17	CALU	MX	Inclusion form	AGGCTTGGAAAGATTGTAAGTAAA	CGTCCTCATTGAGGTCATG	CCTTCCACTGTCGCTCTACATCCTCGT
ENSG00000128595.17;MX:7:128748804-128754262:128754455-128758871:128748804-128754529:128754722-128758871:+	ENSG00000128595.17	CALU	MX	Exclusion form	GGCTTGGAATGATTGTAGATA	CAGGTAAGTGCCATAAGTC	CCTCCGTCACAAACCCATCTTTATCCG
ENSG00000089127.15;A3:12:112917700-112918597:112917700-112919389:+	ENSG00000089127.15	OAS1	A3	Inclusion form	GCTGAATTACCCATGCTTTAAGA	GCAAGTGACCTCACCTCTC	TTGTCTCATCAGCAGAATCCAGGAGC
ENSG00000089127.15;A3:12:112917700-112918597:112917700-112919389:+	ENSG00000089127.15	OAS1	A3	Exclusion form	GCTGAATTACCCATGCTTTAAGA	CGTCGGTCTCATCGTCTG	TTCAGCCAGCAGAATCCAGGAGC
ENSG00000109046.15;A3:17:27306882-27307744:27306882-27309100:+	ENSG00000109046.15	WSB1	A3	Inclusion form	CTGACTCTTCTATGCTGTGTTC	GCCAGCATAACCTCAATCAC	CCACCACTGCTTTACTGGCTCCGAC
ENSG00000109046.15;A3:17:27306882-27307744:27306882-27309100:+	ENSG00000109046.15	WSB1	A3	Exclusion form	AGCCAGTAAAGCAGTTTTCC	TGTGGATCCCAGATATATACTCG	ATGCAGTAGCCAGTAATGCTCCATCAG
ENSG00000132507.18;AF:17:7306999:7307115-7309615:7308371:7308575-7309615:+	ENSG00000132507.18	EIF5A	AF	Inclusion form	GACTGATTCCAAGACAAGGC	TCTCGAAGTCCAAGTCATCTG	CCCACCCCACAGAGCAAGTTTTCT
ENSG00000132507.18;AF:17:7306999:7307115-7309615:7308371:7308575-7309615:+	ENSG00000132507.18	EIF5A	AF	Exclusion form	GAGGCTCGGGTCCTAATC	GAGGCTTCGATTCCAAACC	TGACCGCCACACTTCACAGGAG
ENSG00000221923.9;AL:19:52374427-52379421:52380075:52374427-52383849:52385795:+	ENSG00000221923.9	ZNF880	AL	Inclusion form	TTCCCAGCTCAGGTGATC	CCAGTATAGGCAACAATTCCTC	ACCCGCCTCAGCCTCCCAAAGTTCT
ENSG00000221923.9;AL:19:52374427-52379421:52380075:52374427-52383849:52385795:+	ENSG00000221923.9	ZNF880	AL	Exclusion form	CACACTGGAGAGAAACTTTACAA	GTGCATTCTATGATGATTGGTTAGA	AACTTGTGCCTGAAGACCTTGCCAC
ENSG00000181638.20;A5:8:143247749-143249690:143247142-143249690:+	ENSG00000181638.20	ZFP41	A5	Inclusion form	AGAGGAATACTCGCACTCC	TCCAGGATCACACGTCAC	CGTGCTCTGATGCCTGCTTCTGAACAA
ENSG00000181638.20;A5:8:143247749-143249690:143247142-143249690:+	ENSG00000181638.20	ZFP41	A5	Exclusion form	CCTTCCTGGCATCTCAGA	TCTGGGTTGTGGCTTTAATG	CCTGCAATAAGAACGCTGACACTTGGC
		C1ORF43			CGTTCCTTAATGGGCAAGAA	AAGGGTATCAATGAGTGCTTTG	TTCCGCTCCTACCTGCTGGATCTGC
