# Supplementary material for: Benchmarking RNA-seq with the Quartet Reference Materials to establish Best Practices for Accurate Alternative Splicing Detection
Source: Research Square preprint supplement (doi:10.21203/rs.3.rs-7716867/v1), 2025-11-05
Supplement: Supplementary file 2 [file 541bec2c316d98aae0276a6c.xlsx]

## Sheet: Based on the Quartet reference
Supplementary Data 3. MCC ranking of all 138 differential isoform expression analysis pipelines based on the Quartet reference datasets.
Mapping	Isoform quantification	Differential expression analysis	lab01	lab04	lab05	lab08	lab11	lab13	lab16	lab17	lab20	lab21	lab22	lab23	lab29	lab30	lab33	lab35	lab36	lab42	Mean
Subjunc	featureCounts	edgeR-GLM	0.756131	0.741962	0.75877	0.747879	0.761663	0.767509	0.719231	0.709741	0.756182	0.776001	0.749837	0.736572	0.745357	0.770392	0.765754	0.773157	0.762438	0.77154	0.753895
Subjunc	featureCounts	edgeR-qCML	0.756131	0.741962	0.75877	0.747879	0.761663	0.767509	0.719231	0.709741	0.756182	0.776001	0.749837	0.736572	0.745357	0.770392	0.765754	0.773157	0.762438	0.77154	0.753895
HISAT2	featureCounts	limma-trend	0.756138	0.73878	0.761442	0.749803	0.762381	0.767923	0.723896	0.707418	0.753235	0.773319	0.745313	0.742082	0.743468	0.770238	0.766973	0.773273	0.761715	0.771958	0.753853
Subjunc	featureCounts	edgeR_QL	0.755502	0.742438	0.759397	0.746938	0.762137	0.767509	0.719231	0.709258	0.755691	0.775382	0.750469	0.736274	0.745528	0.770392	0.765262	0.773157	0.762438	0.77154	0.753808
Subjunc	featureCounts	limma-trend	0.755215	0.74229	0.762511	0.746077	0.763078	0.769892	0.717109	0.709604	0.75723	0.77426	0.746267	0.735013	0.744324	0.768461	0.766973	0.77426	0.762551	0.773054	0.753787
STAR	featureCounts	limma-trend	0.757371	0.741571	0.757307	0.749516	0.761688	0.770512	0.723643	0.704091	0.753844	0.776253	0.743496	0.737319	0.745862	0.767726	0.766802	0.773217	0.764556	0.771192	0.753665
Subjunc	featureCounts	DESeq2	0.755019	0.741325	0.760997	0.74836	0.7625	0.766394	0.72021	0.70828	0.755071	0.776137	0.748074	0.735888	0.746016	0.768145	0.765622	0.773166	0.761682	0.772485	0.753632
Subjunc	featureCounts	limma-voom	0.754294	0.742758	0.759682	0.74804	0.763861	0.767144	0.718085	0.707297	0.758556	0.775129	0.74631	0.73477	0.745836	0.769502	0.76553	0.773157	0.763064	0.77154	0.753586
HISAT2	featureCounts	limma-voom	0.753728	0.740849	0.75566	0.749397	0.760107	0.76793	0.723063	0.70832	0.75338	0.775554	0.745313	0.738866	0.743387	0.769541	0.765129	0.77018	0.763979	0.769009	0.752966
HISAT2	featureCounts	DESeq2	0.755298	0.737036	0.755856	0.749407	0.759188	0.765695	0.723603	0.709811	0.755209	0.773589	0.746644	0.736825	0.745004	0.770051	0.766481	0.770681	0.7621	0.770103	0.752921
STAR	featureCounts	DESeq2	0.757371	0.740119	0.757522	0.746782	0.759546	0.768253	0.723433	0.708122	0.749963	0.772805	0.742496	0.738791	0.745076	0.768532	0.765565	0.770029	0.763051	0.770477	0.752663
STAR	featureCounts	limma-voom	0.757123	0.739327	0.757658	0.74898	0.762815	0.770736	0.72014	0.703497	0.748936	0.774142	0.743837	0.737985	0.742656	0.767514	0.765334	0.771623	0.764803	0.770806	0.752662
HISAT2	featureCounts	edgeR_QL	0.755421	0.737513	0.75233	0.750972	0.760107	0.767306	0.721925	0.706518	0.753588	0.773945	0.747419	0.737758	0.741796	0.771287	0.765129	0.771659	0.763353	0.76886	0.752605
HISAT2	featureCounts	edgeR-qCML	0.755557	0.735456	0.75266	0.7505	0.759158	0.766317	0.722011	0.707174	0.754358	0.773581	0.748053	0.738701	0.741955	0.771287	0.766246	0.771165	0.763353	0.76886	0.752577
HISAT2	featureCounts	edgeR-GLM	0.755557	0.735456	0.75266	0.7505	0.759158	0.766317	0.722011	0.707174	0.754358	0.773581	0.748053	0.738701	0.741479	0.771287	0.766246	0.771165	0.763353	0.76886	0.752551
STAR	featureCounts	edgeR_QL	0.756861	0.740279	0.756207	0.750562	0.759839	0.768372	0.721886	0.704974	0.74864	0.773778	0.744049	0.738621	0.743779	0.768018	0.765826	0.770021	0.763677	0.770185	0.752532
STAR	featureCounts	edgeR-GLM	0.757988	0.740119	0.755579	0.749455	0.759365	0.769492	0.721956	0.704974	0.749612	0.772797	0.744189	0.738152	0.742819	0.768018	0.765826	0.770021	0.763677	0.770185	0.752457
STAR	featureCounts	edgeR-qCML	0.757988	0.740119	0.755579	0.749455	0.759365	0.769492	0.721956	0.704974	0.749612	0.772797	0.744189	0.738152	0.742819	0.768018	0.765826	0.770021	0.763677	0.770185	0.752457
Bowtie2	Salmon	limma-trend	0.753057	0.736876	0.739805	0.719264	0.726992	0.776148	0.722844	0.640257	0.750012	0.767655	0.724415	0.704218	0.700056	0.770594	0.756487	0.776027	0.767792	0.777187	0.739427
Bowtie2	Salmon	edgeR_QL	0.75288	0.736574	0.743973	0.714195	0.731291	0.77625	0.723032	0.638891	0.749578	0.771454	0.724219	0.700457	0.70067	0.772104	0.757272	0.773315	0.766027	0.776662	0.73938
Bowtie2	Salmon	edgeR-qCML	0.75288	0.735653	0.745499	0.714195	0.731105	0.776718	0.721847	0.638195	0.749119	0.771926	0.723929	0.699801	0.701325	0.772104	0.757899	0.77378	0.766027	0.776662	0.73937
Bowtie2	Salmon	edgeR-GLM	0.753508	0.735193	0.744604	0.713733	0.730839	0.776718	0.721847	0.638413	0.749119	0.771454	0.724107	0.699801	0.700867	0.772104	0.757899	0.77378	0.766027	0.776662	0.73926
Bowtie2	Salmon	limma-voom	0.754932	0.735125	0.743157	0.713022	0.728548	0.775952	0.719478	0.638674	0.748777	0.770213	0.72264	0.700123	0.69916	0.770388	0.756951	0.77378	0.767644	0.775575	0.738563
Bowtie2	Salmon	DESeq2	0.749897	0.728876	0.744787	0.716572	0.724068	0.778115	0.724746	0.629339	0.745808	0.773114	0.724271	0.698683	0.702641	0.76844	0.757912	0.776353	0.766902	0.77854	0.738281
Bowtie2	eXpress	edgeR-qCML	0.756357	0.719474	0.74518	0.714452	0.737602	0.777037	0.726221	0.635695	0.753327	0.762294	0.717295	0.712479	0.627138	0.773378	0.589972	0.770704	0.764652	0.777473	0.725596
Bowtie2	eXpress	edgeR_QL	0.759708	0.716926	0.7441	0.715606	0.735057	0.77642	0.726611	0.635897	0.753163	0.760885	0.716747	0.71053	0.628036	0.774616	0.590635	0.772096	0.764652	0.777473	0.725509
Bowtie2	eXpress	edgeR-GLM	0.756357	0.718605	0.744466	0.71351	0.736244	0.776111	0.726221	0.63436	0.753492	0.761831	0.717664	0.711752	0.628047	0.773378	0.591669	0.770704	0.764652	0.777473	0.725363
Bowtie2	eXpress	limma-trend	0.753186	0.71738	0.744782	0.720042	0.730999	0.779814	0.727603	0.630909	0.750478	0.763131	0.713542	0.711176	0.635044	0.775593	0.587592	0.771535	0.765623	0.776585	0.725279
Bowtie2	eXpress	limma-voom	0.755497	0.714522	0.744283	0.709467	0.732963	0.780596	0.727279	0.635831	0.748918	0.761975	0.711284	0.71089	0.628528	0.772284	0.592331	0.772408	0.766771	0.775618	0.724525
Bowtie2	eXpress	DESeq2	0.754536	0.713551	0.745654	0.709247	0.729748	0.777702	0.728721	0.629423	0.748673	0.7631	0.717712	0.703954	0.630092	0.774026	0.590039	0.772573	0.76703	0.777232	0.724056
Subjunc	featureCounts	NOISeq-real	0.730969	0.695652	0.720946	0.71694	0.722119	0.74442	0.6686	0.666871	0.71756	0.744306	0.679292	0.695509	0.711047	0.745491	0.729778	0.758531	0.74844	0.761211	0.719871
Bowtie2	Salmon	NOISeq-real	0.738872	0.686701	0.725638	0.68078	0.702882	0.759234	0.711606	0.628206	0.73115	0.748168	0.694417	0.671655	0.696441	0.760627	0.714199	0.764175	0.734294	0.763409	0.717358
STAR	featureCounts	NOISeq-real	0.72292	0.673408	0.713574	0.718565	0.718097	0.734422	0.664094	0.662326	0.707354	0.739027	0.674461	0.696683	0.710266	0.74346	0.714701	0.757938	0.743437	0.754585	0.713851
Bowtie2	Salmon	NOISeq-BIO	0.750048	0.679729	0.732775	0.671737	0.7152	0.760214	0.701155	0.624494	0.740697	0.749458	0.682222	0.669573	0.68656	0.755401	0.692951	0.758041	0.704666	0.738826	0.711875
HISAT2	featureCounts	NOISeq-real	0.727205	0.656987	0.712097	0.716586	0.708141	0.733502	0.664111	0.632738	0.702223	0.73775	0.670777	0.693955	0.706043	0.738239	0.722641	0.749978	0.743032	0.755075	0.709504
Bowtie2	eXpress	NOISeq-BIO	0.749845	0.689937	0.73585	0.679684	0.71776	0.764435	0.700051	0.62634	0.742476	0.745355	0.679578	0.683401	0.622686	0.754998	0.562078	0.759324	0.72639	0.74926	0.704969
Bowtie2	eXpress	NOISeq-real	0.708757	0.676917	0.718286	0.678181	0.708674	0.748546	0.693394	0.603169	0.687381	0.735519	0.646491	0.676694	0.585347	0.755443	0.555765	0.76278	0.756396	0.757923	0.691981
STAR	Salmon	DESeq2	0.731717	0.672182	0.689629	0.643448	0.650291	0.74226	0.64992	0.57	0.695607	0.738815	0.628429	0.617455	0.652898	0.755476	0.725943	0.778124	0.737687	0.744228	0.690228
STAR	Salmon	edgeR_QL	0.73068	0.668369	0.689879	0.642741	0.631792	0.748165	0.652229	0.560401	0.677555	0.745148	0.597755	0.614891	0.644468	0.760646	0.721054	0.783228	0.744968	0.750827	0.686933
STAR	Salmon	edgeR-GLM	0.73185	0.662237	0.68164	0.64388	0.61341	0.742704	0.660493	0.555071	0.679394	0.739462	0.595427	0.606647	0.652547	0.756093	0.722187	0.77897	0.738261	0.744756	0.683613
STAR	Salmon	limma-trend	0.727844	0.666429	0.681149	0.634936	0.621678	0.74446	0.646611	0.556859	0.679887	0.7429	0.589866	0.602206	0.637112	0.762358	0.723493	0.777125	0.735681	0.745203	0.681989
STAR	Salmon	edgeR-qCML	0.731953	0.661697	0.674695	0.641919	0.607595	0.740415	0.659891	0.556307	0.676503	0.739139	0.593593	0.603683	0.64868	0.755509	0.720088	0.778455	0.740083	0.742313	0.681807
STAR	RSEM	DESeq2	0.722126	0.668375	0.688036	0.6511	0.654565	0.738962	0.655741	0.533433	0.686577	0.741226	0.62665	0.532057	0.659125	0.74178	0.728018	0.761513	0.740113	0.733579	0.681276
STAR	RSEM	edgeR-GLM	0.726835	0.679933	0.676627	0.650304	0.634239	0.740265	0.666698	0.515906	0.678788	0.745528	0.612849	0.532944	0.658526	0.74223	0.727266	0.763808	0.746408	0.73341	0.679587
STAR	RSEM	edgeR_QL	0.725695	0.676177	0.677231	0.650121	0.640473	0.737932	0.6553	0.525295	0.670249	0.74362	0.610297	0.518909	0.648327	0.753305	0.730718	0.767072	0.748615	0.734965	0.678572
STAR	RSEM	edgeR-qCML	0.725321	0.677879	0.673623	0.650261	0.632845	0.739398	0.665134	0.514154	0.671065	0.747584	0.607881	0.532354	0.658644	0.742109	0.726406	0.764006	0.744536	0.732741	0.678108
STAR	RSEM	limma-trend	0.721969	0.666048	0.667213	0.648965	0.632155	0.736625	0.650733	0.522161	0.658151	0.739866	0.597507	0.502005	0.640192	0.744718	0.726275	0.767142	0.740431	0.731344	0.671861
Bowtie2	RSEM	DESeq2	0.704479	0.646593	0.667785	0.619493	0.644238	0.726172	0.655199	0.495337	0.671813	0.734622	0.619321	0.602115	0.632816	0.727279	0.712178	0.747487	0.723942	0.729149	0.670001
Subjunc	featureCounts	NOISeq-BIO	0.677735	0.662429	0.677645	0.661357	0.679052	0.678419	0.633992	0.631889	0.666994	0.681094	0.653766	0.661631	0.673722	0.681664	0.667748	0.687838	0.683109	0.683124	0.669067
HISAT2	RSEM	edgeR-GLM	0.706487	0.652617	0.662336	0.621857	0.624365	0.722792	0.65724	0.490647	0.657354	0.733858	0.61016	0.59238	0.640088	0.727791	0.719365	0.748528	0.733359	0.72554	0.668154
HISAT2	RSEM	edgeR-qCML	0.702377	0.651058	0.662175	0.621783	0.623064	0.721718	0.656771	0.490758	0.654887	0.728815	0.607136	0.587454	0.64106	0.724375	0.720013	0.750829	0.734303	0.725123	0.666872
HISAT2	RSEM	edgeR_QL	0.707672	0.654373	0.663359	0.619261	0.618441	0.718953	0.65779	0.497853	0.656395	0.730045	0.599656	0.573066	0.630334	0.732034	0.719657	0.750659	0.73651	0.729493	0.666419
STAR	Salmon	limma-voom	0.715341	0.656448	0.664439	0.616373	0.602882	0.730291	0.625528	0.531192	0.651552	0.73237	0.583492	0.582281	0.606878	0.749347	0.708544	0.7693	0.731357	0.735449	0.666281
Bowtie2	RSEM	DESeq2	0.706248	0.638649	0.668257	0.626264	0.649222	0.722503	0.646447	0.491322	0.666539	0.72812	0.615147	0.59014	0.634987	0.728044	0.697477	0.742011	0.708407	0.729528	0.666073
Bowtie2	RSEM	edgeR_QL	0.708761	0.648637	0.662292	0.630285	0.626486	0.716699	0.650544	0.489376	0.661396	0.735574	0.595205	0.579003	0.633997	0.737556	0.711638	0.752794	0.717013	0.724554	0.665656
Bowtie2	RSEM	edgeR-GLM	0.707764	0.649188	0.664123	0.627862	0.623722	0.721596	0.65462	0.488476	0.655773	0.733724	0.60463	0.577329	0.639008	0.732269	0.708556	0.747059	0.716023	0.721973	0.665205
STAR	Salmon	NOISeq-BIO	0.733987	0.652892	0.67017	0.607345	0.623961	0.727836	0.610791	0.532265	0.690855	0.722745	0.591677	0.574062	0.633903	0.746222	0.672434	0.753019	0.701901	0.716353	0.664579
Bowtie2	RSEM	edgeR-qCML	0.708068	0.648039	0.660381	0.627043	0.616967	0.718354	0.654208	0.481915	0.65444	0.733904	0.60258	0.578555	0.638016	0.732633	0.707647	0.748473	0.717011	0.721697	0.663885
STAR	RSEM	NOISeq-BIO	0.727576	0.640699	0.682718	0.600326	0.639591	0.718763	0.625115	0.506052	0.688927	0.735536	0.600297	0.52025	0.639656	0.730517	0.678982	0.749091	0.71203	0.720419	0.66203
	Kallisto	edgeR-GLM	0.712466	0.641655	0.67014	0.602675	0.631285	0.721292	0.651912	0.493278	0.660675	0.722437	0.601914	0.585322	0.629633	0.733542	0.676619	0.753318	0.693027	0.72103	0.661234
	Salmon	DESeq2	0.700382	0.648153	0.664137	0.622264	0.62841	0.707218	0.636079	0.532065	0.666495	0.714831	0.5954	0.583098	0.631885	0.723498	0.684826	0.735674	0.694422	0.720064	0.660494
	Kallisto	DESeq2	0.71103	0.638681	0.671675	0.60006	0.641945	0.715113	0.64408	0.496871	0.664945	0.718706	0.60602	0.585531	0.630689	0.731114	0.672321	0.7491	0.685915	0.71938	0.660176
	Kallisto	edgeR_QL	0.720334	0.637349	0.671861	0.599542	0.622415	0.720813	0.648651	0.485726	0.652528	0.72868	0.598002	0.577119	0.619422	0.739915	0.683409	0.756165	0.696583	0.721919	0.660024
	Kallisto	edgeR-qCML	0.710489	0.640562	0.668616	0.60111	0.627757	0.717399	0.650795	0.494379	0.655011	0.721284	0.602397	0.585949	0.625566	0.732874	0.678137	0.752265	0.692312	0.721584	0.659916
Bowtie2	RSEM	limma-trend	0.700483	0.642892	0.655911	0.62508	0.614537	0.712987	0.641579	0.484119	0.654686	0.727367	0.584481	0.566119	0.625075	0.732743	0.713743	0.74935	0.715355	0.724909	0.659523
STAR	Cuffdiff	Cuffdiff	0.690061	0.667787	0.668225	0.656059	0.636714	0.707947	0.602153	0.562902	0.670921	0.707094	0.588324	0.51989	0.612092	0.72001	0.694119	0.734032	0.710685	0.721591	0.659478
HISAT2	RSEM	limma-trend	0.697611	0.647351	0.654863	0.611872	0.605206	0.71718	0.647573	0.486455	0.649804	0.725628	0.586465	0.55845	0.620882	0.732787	0.716205	0.753483	0.728035	0.723884	0.659096
HISAT2	Cuffdiff	Cuffdiff	0.689301	0.666423	0.655929	0.648467	0.624818	0.708499	0.605166	0.559997	0.666667	0.70283	0.58722	0.502312	0.620308	0.721671	0.700215	0.735995	0.713935	0.734603	0.65802
	Salmon	edgeR_QL	0.689371	0.648265	0.646937	0.618738	0.606214	0.713446	0.642018	0.524484	0.651031	0.717326	0.578549	0.571328	0.624856	0.735955	0.690174	0.744171	0.703067	0.719949	0.656993
HISAT2	RSEM	NOISeq-BIO	0.706927	0.637456	0.673707	0.601512	0.64269	0.703575	0.614358	0.507422	0.675096	0.716985	0.58851	0.584582	0.631788	0.728554	0.664174	0.734834	0.698009	0.712027	0.656789
	Kallisto	limma-trend	0.706425	0.633781	0.665242	0.59327	0.616449	0.718601	0.647458	0.478331	0.655252	0.722073	0.592017	0.577786	0.616367	0.736829	0.68346	0.755688	0.696563	0.724961	0.656697
	Sailfish	edgeR-GLM	0.709971	0.620507	0.667656	0.590735	0.621985	0.721726	0.650485	0.495153	0.660838	0.733909	0.586062	0.577469	0.616414	0.735191	0.661431	0.750183	0.670465	0.727478	0.655425
	Sailfish	DESeq2	0.710849	0.619034	0.674111	0.589844	0.650158	0.717885	0.643679	0.493501	0.663053	0.726242	0.58583	0.577545	0.617708	0.727444	0.660019	0.748087	0.663452	0.726107	0.655253
	Sailfish	edgeR_QL	0.716275	0.622396	0.675017	0.584511	0.614439	0.722893	0.647093	0.488773	0.651371	0.735467	0.573229	0.575802	0.616605	0.741613	0.667955	0.751182	0.679735	0.72461	0.654942
	Sailfish	edgeR-qCML	0.708575	0.61978	0.666824	0.590012	0.617773	0.718535	0.649854	0.496617	0.656319	0.733433	0.581641	0.578207	0.616063	0.736178	0.659426	0.749969	0.670635	0.727017	0.65427
STAR	RSEM	limma-voom	0.701321	0.65975	0.645284	0.614931	0.603182	0.72358	0.631089	0.489062	0.639417	0.735784	0.588098	0.471582	0.609458	0.733582	0.711534	0.756595	0.728811	0.719472	0.653474
STAR	featureCounts	NOISeq-BIO	0.661488	0.623352	0.653648	0.644481	0.665651	0.661429	0.624244	0.609562	0.653835	0.670633	0.638454	0.650928	0.664588	0.670731	0.647382	0.67985	0.664074	0.677533	0.653437
	Salmon	edgeR-GLM	0.694624	0.643454	0.64234	0.614551	0.583301	0.70651	0.642006	0.518812	0.648159	0.716835	0.576997	0.569605	0.623017	0.729797	0.688748	0.74047	0.695572	0.721293	0.653116
	Salmon	limma-trend	0.687985	0.640935	0.644231	0.61853	0.594075	0.706121	0.634916	0.519286	0.645587	0.711677	0.570663	0.565409	0.617605	0.732121	0.694691	0.740474	0.704253	0.718756	0.652629
	Sailfish	limma-trend	0.705116	0.614714	0.669793	0.58054	0.612572	0.719849	0.637861	0.479018	0.652063	0.736132	0.570792	0.568616	0.619194	0.736244	0.667642	0.751709	0.678322	0.726486	0.651481
	Salmon	edgeR-qCML	0.689153	0.641385	0.638052	0.60721	0.580628	0.70565	0.640269	0.51781	0.645485	0.714097	0.577864	0.562347	0.623285	0.729215	0.686965	0.740518	0.695799	0.718799	0.650807
HISAT2	featureCounts	NOISeq-BIO	0.656169	0.609557	0.650625	0.646875	0.657459	0.653194	0.623462	0.581277	0.642553	0.669284	0.630958	0.645622	0.662562	0.665675	0.653868	0.670327	0.668297	0.673451	0.647845
	Kallisto	limma-voom	0.697406	0.626499	0.656248	0.579521	0.591163	0.713742	0.640169	0.465809	0.64037	0.725928	0.589945	0.556512	0.592696	0.73262	0.677966	0.75049	0.690432	0.708394	0.646439
Bowtie2	RSEM	limma-voom	0.690291	0.635536	0.640411	0.597116	0.591488	0.702452	0.63203	0.462983	0.635438	0.722865	0.576536	0.551298	0.60028	0.730194	0.694353	0.745108	0.711145	0.713585	0.646284
Bowtie2	RSEM	NOISeq-BIO	0.700425	0.61677	0.665028	0.583926	0.632302	0.69615	0.612338	0.484665	0.666427	0.712467	0.572043	0.56631	0.622781	0.719903	0.656112	0.728555	0.677752	0.700739	0.645261
	Kallisto	NOISeq-BIO	0.701673	0.602732	0.6671	0.583199	0.631121	0.698423	0.614835	0.470064	0.671459	0.704818	0.566771	0.569718	0.605087	0.73285	0.663214	0.737667	0.673066	0.701301	0.644172
	Sailfish	limma-voom	0.69373	0.611679	0.65811	0.565076	0.594599	0.71396	0.63863	0.470436	0.640633	0.733373	0.564524	0.550711	0.596093	0.73545	0.666039	0.746065	0.674325	0.712419	0.642547
HISAT2	RSEM	limma-voom	0.679479	0.637507	0.636021	0.586684	0.57945	0.704927	0.629453	0.465519	0.620151	0.713492	0.575047	0.545145	0.593991	0.721916	0.703424	0.739033	0.718896	0.710098	0.642235
	Salmon	limma-voom	0.675387	0.629556	0.623533	0.591185	0.575053	0.703456	0.627999	0.502496	0.61739	0.708763	0.566295	0.543581	0.599589	0.72665	0.679764	0.737856	0.697302	0.712028	0.639882
	Sailfish	NOISeq-BIO	0.704236	0.580809	0.670276	0.565041	0.638081	0.70049	0.606474	0.469451	0.669848	0.708693	0.548814	0.561023	0.592366	0.733458	0.649955	0.740043	0.650624	0.698152	0.638213
	Salmon	NOISeq-BIO	0.699037	0.617498	0.641465	0.576569	0.601205	0.689212	0.610827	0.491188	0.657506	0.688105	0.554886	0.546107	0.61197	0.711656	0.626258	0.722859	0.66322	0.69061	0.633343
STAR	eXpress	DESeq2	0.695109	0.458816	0.656719	0.572774	0.631662	0.717879	0.612463	0.459579	0.65747	0.718866	0.603467	0.584366	0.539929	0.732634	0.537378	0.757269	0.732569	0.730753	0.633317
STAR	eXpress	NOISeq-BIO	0.710912	0.455126	0.665007	0.577237	0.638189	0.715151	0.587982	0.466319	0.651517	0.710853	0.591231	0.564326	0.54184	0.729589	0.527222	0.748787	0.711128	0.727129	0.628864
STAR	eXpress	edgeR-GLM	0.686163	0.453	0.638913	0.566047	0.611973	0.712059	0.62307	0.45614	0.635432	0.713993	0.564725	0.585443	0.523852	0.730167	0.541382	0.756797	0.737465	0.739865	0.626471
STAR	eXpress	edgeR-qCML	0.681794	0.445687	0.634609	0.560589	0.610313	0.711506	0.623135	0.454312	0.631205	0.710853	0.556179	0.583348	0.52038	0.730161	0.539551	0.758538	0.732001	0.736613	0.623376
STAR	eXpress	edgeR_QL	0.67096	0.45081	0.634587	0.549313	0.584713	0.715874	0.600783	0.442298	0.619678	0.70051	0.480663	0.565985	0.506811	0.72455	0.538783	0.753905	0.730762	0.730402	0.611188
HISAT2	StringTie	DESeq2	0.650103	0.594944	0.605508	0.57337	0.597664	0.658275	0.580323	0.486202	0.617216	0.619973	0.543965	0.555158	0.58941	0.647501	0.629366	0.68046	0.629294	0.643013	0.605652
STAR	StringTie	DESeq2	0.631361	0.616039	0.61245	0.569616	0.604309	0.639698	0.564195	0.50955	0.610422	0.625831	0.593126	0.562078	0.591711	0.627768	0.625189	0.65589	0.622437	0.630938	0.605145
STAR	StringTie	limma-trend	0.637281	0.598414	0.583315	0.56654	0.560309	0.644196	0.566187	0.501851	0.577087	0.645528	0.560616	0.55619	0.58726	0.64964	0.649021	0.669208	0.649547	0.643282	0.602526
STAR	eXpress	limma-trend	0.658343	0.439378	0.618818	0.545684	0.574408	0.702315	0.595119	0.431136	0.610012	0.687958	0.479653	0.55483	0.487324	0.719801	0.535103	0.747598	0.727614	0.720848	0.601997
HISAT2	StringTie	limma-trend	0.645159	0.591725	0.596277	0.554355	0.553243	0.642359	0.547292	0.492764	0.587406	0.630475	0.516452	0.539329	0.570664	0.651572	0.65361	0.669703	0.628316	0.641494	0.595122
STAR	StringTie	limma-voom	0.625144	0.586657	0.581866	0.549879	0.539382	0.638091	0.537493	0.478303	0.567736	0.638417	0.516067	0.537891	0.569269	0.641931	0.641818	0.667094	0.64321	0.641401	0.58898
STAR	StringTie	edgeR_QL	0.635882	0.595785	0.564311	0.55159	0.528621	0.630161	0.533218	0.485167	0.546879	0.637624	0.522194	0.542543	0.572061	0.645761	0.646209	0.663368	0.64797	0.641091	0.588358
Bowtie2	Salmon	Sleuth	0.602714	0.596134	0.61034	0.582993	0.599777	0.608087	0.559244	0.503462	0.604235	0.599776	0.572036	0.565712	0.568896	0.60296	0.585334	0.609787	0.561979	0.602312	0.585321
Subjunc	StringTie	DESeq2	0.616205	0.581283	0.596389	0.533621	0.578769	0.639241	0.547084	0.495713	0.586198	0.613228	0.563371	0.517196	0.572004	0.624666	0.583885	0.646479	0.588243	0.620708	0.583571
Subjunc	StringTie	limma-trend	0.602777	0.580155	0.579422	0.53569	0.557464	0.639868	0.54544	0.500085	0.576717	0.608717	0.532766	0.518571	0.56367	0.634216	0.615483	0.658635	0.608385	0.633472	0.582863
HISAT2	StringTie	edgeR_QL	0.627206	0.584587	0.56615	0.535347	0.527605	0.633793	0.510734	0.487084	0.553568	0.612326	0.487474	0.522924	0.55587	0.651175	0.651094	0.665897	0.635148	0.635767	0.580208
STAR	eXpress	limma-voom	0.630895	0.419349	0.593465	0.519617	0.526959	0.691297	0.574248	0.406836	0.58705	0.686499	0.420306	0.534232	0.463458	0.702865	0.523202	0.734563	0.716516	0.710916	0.580126
HISAT2	StringTie	limma-voom	0.624901	0.577612	0.580588	0.535066	0.52959	0.63725	0.519223	0.467937	0.56011	0.62283	0.484004	0.529885	0.54344	0.649785	0.64131	0.663643	0.618191	0.631221	0.578699
Subjunc	StringTie	limma-voom	0.596912	0.576811	0.571518	0.530634	0.532722	0.627285	0.540406	0.487046	0.559029	0.6079	0.517544	0.513031	0.551634	0.634599	0.617298	0.652498	0.603116	0.633223	0.575178
HISAT2	StringTie	edgeR-GLM	0.631873	0.59604	0.560034	0.548107	0.494775	0.611318	0.490448	0.492202	0.571541	0.57674	0.465786	0.523553	0.58014	0.637738	0.64625	0.67589	0.63716	0.611409	0.575056
STAR	StringTie	edgeR-GLM	0.626091	0.616689	0.544937	0.563662	0.515228	0.589706	0.462367	0.482985	0.534902	0.578954	0.480023	0.546637	0.607701	0.627512	0.640407	0.656711	0.649005	0.612776	0.574238
Subjunc	StringTie	edgeR_QL	0.597852	0.574043	0.555355	0.520261	0.513544	0.628511	0.51998	0.488875	0.549047	0.597494	0.502957	0.507505	0.55341	0.630611	0.615004	0.657614	0.608807	0.629282	0.569453
HISAT2	StringTie	edgeR-qCML	0.626454	0.593631	0.543123	0.545145	0.493245	0.602193	0.474956	0.479159	0.563657	0.567657	0.454034	0.523586	0.575221	0.636517	0.646439	0.674535	0.638764	0.610591	0.569384
STAR	StringTie	edgeR-qCML	0.622854	0.614918	0.529896	0.556944	0.507023	0.587336	0.448832	0.474412	0.527147	0.575339	0.472598	0.54044	0.601502	0.623319	0.643172	0.654481	0.648533	0.61355	0.569016
STAR	Salmon	Sleuth	0.582757	0.574081	0.563519	0.502234	0.488243	0.605798	0.5181	0.462105	0.564034	0.582043	0.508255	0.480938	0.528307	0.589278	0.573642	0.626623	0.579712	0.589742	0.551078
HISAT2	StringTie	NOISeq-BIO	0.591316	0.522528	0.576235	0.507804	0.54755	0.598633	0.500674	0.45437	0.575413	0.559198	0.47361	0.507951	0.534163	0.592796	0.554674	0.618659	0.548411	0.562365	0.545908
STAR	StringTie	NOISeq-BIO	0.578927	0.535502	0.547095	0.514728	0.560494	0.577131	0.483868	0.446809	0.553651	0.56872	0.501006	0.51215	0.540642	0.573366	0.556627	0.604387	0.552528	0.565789	0.542968
	Kallisto	Sleuth	0.565105	0.532302	0.555915	0.477906	0.515875	0.592105	0.514112	0.417754	0.551749	0.584459	0.486735	0.479842	0.509437	0.572289	0.539993	0.593889	0.550969	0.585221	0.534759
	Sailfish	Sleuth	0.565903	0.500487	0.556391	0.472222	0.520846	0.590308	0.502109	0.416546	0.544574	0.574399	0.45851	0.457112	0.479378	0.57388	0.515904	0.592644	0.526519	0.575966	0.523539
	Salmon	Sleuth	0.552776	0.531412	0.526891	0.476783	0.475711	0.577391	0.490624	0.428437	0.527641	0.549526	0.483852	0.449409	0.501637	0.567142	0.543488	0.580333	0.533865	0.556233	0.51962
Subjunc	StringTie	NOISeq-BIO	0.560627	0.487085	0.532187	0.468986	0.521201	0.54902	0.452865	0.405352	0.52401	0.532382	0.449353	0.463013	0.495831	0.545226	0.505146	0.576362	0.495111	0.526862	0.505034
Subjunc	StringTie	edgeR-GLM	0.532883	0.554792	0.447456	0.455177	0.414997	0.501865	0.380204	0.432344	0.461787	0.445771	0.346369	0.438904	0.50781	0.541423	0.618611	0.603647	0.554298	0.503462	0.485656
Subjunc	StringTie	edgeR-qCML	0.51609	0.545485	0.435973	0.445436	0.39881	0.486898	0.3635	0.426644	0.449811	0.424481	0.340092	0.432213	0.498637	0.531448	0.613041	0.59694	0.542764	0.494382	0.474591
	Sailfish	NOISeq-real	0.352658	0.398743	0.241876	0.354398	0.198092	0.341505	0.3376	0.237201	0.264457	0.400254	0.209733	0.286696	0.354881	0.455767	0.587166	0.480555	0.601296	0.445626	0.363806
	Kallisto	NOISeq-real	0.358968	0.386895	0.23864	0.351081	0.192118	0.340251	0.33231	0.236217	0.262555	0.395879	0.234913	0.274283	0.345741	0.455425	0.569198	0.482941	0.604691	0.439068	0.361176
STAR	RSEM	NOISeq-real	0.3619	0.319062	0.269953	0.339795	0.221694	0.362625	0.364945	0.230448	0.292613	0.416265	0.237496	0.195763	0.311072	0.467418	0.487831	0.490746	0.503381	0.426186	0.349955
HISAT2	RSEM	NOISeq-real	0.341518	0.307545	0.282306	0.306105	0.226424	0.350999	0.331549	0.266225	0.271728	0.398033	0.245263	0.235886	0.309817	0.442624	0.450482	0.462728	0.499163	0.411214	0.34109
Bowtie2	RSEM	NOISeq-real	0.355917	0.298989	0.259725	0.336146	0.211884	0.343772	0.329081	0.23774	0.270381	0.41322	0.222015	0.231415	0.305674	0.461093	0.426601	0.480171	0.486067	0.418028	0.338218
STAR	Salmon	NOISeq-real	0.369279	0.285589	0.268973	0.300701	0.192626	0.373169	0.333556	0.212284	0.292816	0.399885	0.197161	0.195759	0.29135	0.472536	0.441592	0.503593	0.497739	0.406877	0.335305
HISAT2	StringTie	NOISeq-real	0.355587	0.341959	0.289481	0.317123	0.258949	0.331109	0.284279	0.26584	0.290624	0.30625	0.208671	0.272566	0.320994	0.401682	0.449022	0.440491	0.458812	0.355083	0.330473
STAR	StringTie	NOISeq-real	0.295611	0.338486	0.243204	0.328111	0.257637	0.276208	0.241882	0.253299	0.257552	0.307558	0.213679	0.279675	0.307373	0.330327	0.433226	0.358102	0.422621	0.341912	0.304803
	Salmon	NOISeq-real	0.33021	0.249734	0.210248	0.267768	0.146243	0.311258	0.303701	0.167262	0.222408	0.351755	0.157826	0.160818	0.251676	0.414579	0.437226	0.431308	0.493504	0.354644	0.292343
Subjunc	StringTie	NOISeq-real	0.23264	0.246063	0.205693	0.230751	0.167398	0.231031	0.168394	0.215592	0.217414	0.207891	0.132314	0.200569	0.245154	0.265156	0.325806	0.302166	0.291417	0.247557	0.229612
STAR	eXpress	NOISeq-real	0.158944	0.0943628	0.124416	0.145738	0.106626	0.178496	0.124324	0.097297	0.120973	0.174929	0.127612	0.114789	0.124722	0.187359	0.147877	0.204456	0.199961	0.189537	0.14569
STAR	StringTie	Ballgown	0.140763	0.188765	0.0736489	0.108261	0.149615	0.148958	0.210315	0.0529469	0.115928	0.242304	0.126492	0.0795197	0.127727	0.103123	0.164395	0.219242	0.14826	0.180852	0.143395
HISAT2	StringTie	Ballgown	0.143285	0.184439	0.103057	0.109005	0.143774	0.124173	0.168569	0.0368067	0.127547	0.246205	0.120844	0.0757236	0.117402	0.135181	0.168071	0.230736	0.148515	0.168372	0.141761
Subjunc	StringTie	Ballgown	0.131729	0.192785	0.0988442	0.113408	0.159429	0.147699	0.183574	0.0268277	0.115855	0.24341	0.101013	0.0514035	0.137758	0.108992	0.194157	0.191865	0.147661	0.153916	0.138907
Since the data of lab28 failed to be quantified by RSEM, the data of lab28 were deleted during the comparison.

## Sheet: Based on the RT-qPCR reference
Supplementary Data 3. MCC ranking of all 138 differential isoform expression analysis pipelines based on the RT-qPCR reference datasets.
Mapping	Isoform quantification	Differential expression analysis	lab01	lab04	lab05	lab08	lab11	lab13	lab16	lab17	lab20	lab21	lab22	lab23	lab29	lab30	lab33	lab35	lab36	lab42	Mean
STAR	Salmon	NOISeq-real	0.759751	0.755695	0.717117	0.700223	0.686281	0.717117	0.703054	0.639795	0.74084	0.731768	0.678162	0.704945	0.718834	0.759751	0.749905	0.73379	0.759391	0.727425	0.721325
	Sailfish	NOISeq-real	0.743161	0.715833	0.717117	0.698474	0.73379	0.712902	0.703687	0.589307	0.747708	0.73929	0.674143	0.72851	0.718481	0.774651	0.735818	0.73379	0.725235	0.756856	0.719375
	Kallisto	NOISeq-real	0.743161	0.707587	0.724379	0.66893	0.6768	0.712902	0.696281	0.595907	0.747708	0.724379	0.678394	0.695598	0.714508	0.767136	0.735818	0.73379	0.727896	0.740638	0.710656
STAR	RSEM	NOISeq-real	0.766348	0.726161	0.72657	0.707407	0.683772	0.717117	0.670597	0.594645	0.721981	0.717117	0.683302	0.66939	0.702514	0.761785	0.735583	0.745354	0.742776	0.71493	0.710408
Bowtie2	Salmon	NOISeq-real	0.759721	0.728912	0.722075	0.695343	0.688279	0.722075	0.705586	0.596675	0.722189	0.720082	0.658295	0.692926	0.704476	0.755871	0.714046	0.731544	0.746137	0.715422	0.709981
Bowtie2	RSEM	NOISeq-real	0.747708	0.714508	0.724379	0.690637	0.705424	0.707621	0.684515	0.576426	0.735982	0.724379	0.673626	0.679142	0.714508	0.769001	0.726161	0.745354	0.721957	0.728717	0.709447
STAR	Salmon	DESeq2	0.735982	0.73379	0.705424	0.705424	0.669163	0.714924	0.665594	0.671558	0.698871	0.717117	0.695877	0.682592	0.69808	0.728923	0.743161	0.700444	0.717117	0.755654	0.707761
STAR	StringTie	NOISeq-real	0.72657	0.714508	0.69808	0.690864	0.705627	0.700444	0.664804	0.602938	0.701812	0.729926	0.685979	0.726993	0.679142	0.757894	0.697639	0.72657	0.738204	0.721768	0.703876
	Sailfish	DESeq2	0.735982	0.712902	0.703399	0.669163	0.721981	0.722357	0.719316	0.613858	0.724634	0.717117	0.624992	0.712492	0.684245	0.750463	0.686281	0.743161	0.682394	0.74349	0.70379
Bowtie2	RSEM	DESeq2	0.750214	0.731768	0.69808	0.676634	0.705424	0.714924	0.672146	0.610755	0.702963	0.717117	0.647547	0.650034	0.711061	0.738335	0.735982	0.719472	0.724379	0.755654	0.703472
	Kallisto	DESeq2	0.735982	0.720517	0.703399	0.693848	0.683772	0.722357	0.711654	0.600692	0.724634	0.707621	0.644804	0.696062	0.690864	0.750463	0.702963	0.743161	0.684245	0.733399	0.702802
STAR	RSEM	DESeq2	0.731429	0.750463	0.690864	0.669163	0.688491	0.714924	0.655814	0.664391	0.712492	0.70998	0.671558	0.632308	0.705424	0.731429	0.728923	0.728923	0.728923	0.733399	0.702717
HISAT2	StringTie	NOISeq-real	0.757894	0.687814	0.717117	0.683538	0.696062	0.707621	0.684468	0.592822	0.701812	0.737635	0.656844	0.707742	0.673626	0.73929	0.716697	0.705424	0.731377	0.721768	0.701086
HISAT2	RSEM	NOISeq-real	0.728923	0.716697	0.707621	0.681004	0.686281	0.705424	0.6611	0.582814	0.724379	0.69808	0.663902	0.679142	0.704999	0.750463	0.714508	0.719472	0.721957	0.709764	0.697585
Bowtie2	Salmon	DESeq2	0.736048	0.729548	0.70301	0.668864	0.676246	0.70301	0.69413	0.651791	0.700411	0.705177	0.639358	0.647475	0.683761	0.724242	0.714731	0.705177	0.720082	0.734481	0.69653
	Sailfish	edgeR_QL	0.735982	0.712902	0.682394	0.674589	0.674589	0.729926	0.718904	0.593731	0.683772	0.717117	0.632308	0.700444	0.674589	0.757894	0.686281	0.724379	0.690353	0.74084	0.696166
	Kallisto	edgeR-GLM	0.735982	0.720517	0.682394	0.693848	0.657175	0.720517	0.701686	0.600692	0.683772	0.707621	0.642206	0.674106	0.695877	0.757894	0.70998	0.724379	0.684245	0.736869	0.696098
	Kallisto	edgeR_QL	0.735982	0.720517	0.674589	0.693848	0.657175	0.720517	0.701686	0.600692	0.683772	0.707621	0.642206	0.674106	0.695877	0.757894	0.70998	0.724379	0.684245	0.736869	0.695664
	Sailfish	edgeR-GLM	0.735982	0.712902	0.682394	0.674589	0.674589	0.729926	0.718904	0.593731	0.683772	0.717117	0.632308	0.690864	0.674589	0.757894	0.686281	0.724379	0.690353	0.74084	0.695634
STAR	Salmon	limma-trend	0.72657	0.720517	0.674589	0.662785	0.67273	0.695877	0.686653	0.62183	0.674106	0.714924	0.654875	0.678853	0.693419	0.735982	0.741136	0.717117	0.717117	0.731429	0.695584
STAR	Salmon	edgeR-qCML	0.72657	0.703399	0.657175	0.66465	0.663007	0.705424	0.679336	0.641704	0.674106	0.724379	0.66465	0.681235	0.693419	0.735982	0.741136	0.70998	0.717117	0.731429	0.695261
STAR	RSEM	edgeR_QL	0.731429	0.729926	0.676634	0.65942	0.682394	0.714924	0.641436	0.644296	0.671558	0.717117	0.64962	0.618569	0.70319	0.731429	0.735982	0.728923	0.728923	0.74349	0.694959
STAR	RSEM	edgeR-GLM	0.731429	0.720517	0.676634	0.65942	0.682394	0.714924	0.648303	0.651553	0.671558	0.717117	0.639762	0.608499	0.70319	0.731429	0.735982	0.728923	0.728923	0.74349	0.694114
HISAT2	Salmon	edgeR-GLM	0.69808	0.712902	0.695877	0.678853	0.688491	0.67273	0.649134	0.629592	0.652045	0.722357	0.686281	0.719472	0.701557	0.711061	0.69808	0.703399	0.728275	0.728923	0.693173
HISAT2	Salmon	edgeR_QL	0.69808	0.712902	0.695877	0.678853	0.688491	0.67273	0.649134	0.629592	0.652045	0.722357	0.686281	0.719472	0.701557	0.711061	0.69808	0.703399	0.728275	0.728923	0.693173
STAR	Cuffdiff	Cuffdiff	0.719472	0.712902	0.731768	0.676634	0.68606	0.672292	0.714286	0.64962	0.683772	0.712492	0.68053	0.625781	0.67273	0.707407	0.688491	0.695661	0.710453	0.735381	0.693096
HISAT2	Salmon	limma-voom	0.69808	0.712902	0.695877	0.678853	0.688491	0.67273	0.641704	0.62209	0.661828	0.731768	0.686281	0.719472	0.692002	0.711061	0.69808	0.703399	0.728275	0.728923	0.692879
HISAT2	Salmon	edgeR-qCML	0.69808	0.712902	0.695877	0.678853	0.688491	0.67273	0.649134	0.629592	0.652045	0.722357	0.676634	0.719472	0.701557	0.711061	0.69808	0.703399	0.728275	0.728923	0.692637
STAR	Salmon	edgeR_QL	0.72657	0.682394	0.655106	0.684027	0.633465	0.705424	0.665078	0.631798	0.671558	0.724379	0.672511	0.664391	0.70298	0.735982	0.741136	0.70998	0.717117	0.731429	0.691962
Bowtie2	RSEM	edgeR-qCML	0.731429	0.711061	0.657175	0.657175	0.693848	0.722357	0.662391	0.6017	0.678853	0.717117	0.624992	0.61781	0.691792	0.745354	0.752492	0.719472	0.717117	0.750214	0.691797
Bowtie2	RSEM	edgeR_QL	0.731429	0.720517	0.657175	0.676634	0.680741	0.722357	0.665078	0.586955	0.678853	0.717117	0.634927	0.610755	0.701351	0.738335	0.752492	0.719472	0.717117	0.74084	0.691786
HISAT2	Salmon	DESeq2	0.69808	0.720517	0.686281	0.686281	0.703399	0.67273	0.649378	0.62934	0.661828	0.712902	0.674589	0.721981	0.676634	0.703399	0.69808	0.703399	0.712902	0.721981	0.690761
Bowtie2	RSEM	limma-trend	0.731429	0.720517	0.655106	0.664876	0.693848	0.729926	0.662391	0.573775	0.693848	0.717117	0.634927	0.614995	0.684027	0.745354	0.743161	0.72657	0.717117	0.71515	0.69023
	Sailfish	edgeR-qCML	0.72657	0.712902	0.664876	0.635379	0.674589	0.729926	0.709411	0.597683	0.674106	0.717117	0.612325	0.693848	0.674589	0.757894	0.686281	0.724379	0.690353	0.74084	0.69017
Bowtie2	RSEM	edgeR-GLM	0.731429	0.711061	0.647359	0.666932	0.680741	0.722357	0.665078	0.594257	0.678853	0.717117	0.634927	0.610755	0.691792	0.738335	0.752492	0.719472	0.717117	0.74084	0.690051
STAR	RSEM	edgeR-qCML	0.731429	0.729926	0.676634	0.64962	0.67273	0.714924	0.662391	0.649134	0.671558	0.717117	0.647359	0.554531	0.693634	0.731429	0.735982	0.728923	0.728923	0.721981	0.689901
HISAT2	Cuffdiff	Cuffdiff	0.709764	0.688491	0.712697	0.686281	0.68606	0.691581	0.707373	0.657175	0.673867	0.70298	0.61781	0.644644	0.682394	0.717117	0.686281	0.70319	0.702768	0.74477	0.689736
STAR	Salmon	edgeR-GLM	0.717117	0.682394	0.655106	0.674366	0.623482	0.705424	0.665078	0.631798	0.669163	0.724379	0.672511	0.664391	0.693419	0.735982	0.741136	0.70998	0.717117	0.731429	0.689682
	Kallisto	edgeR-qCML	0.717117	0.711061	0.664876	0.664876	0.666932	0.720517	0.692097	0.604935	0.683772	0.707621	0.639762	0.652045	0.693848	0.757894	0.700444	0.724379	0.684245	0.727425	0.689658
Bowtie2	StringTie	NOISeq-real	0.73587	0.690179	0.673023	0.646316	0.676584	0.686091	0.668491	0.574707	0.71837	0.723921	0.669338	0.701762	0.680536	0.726345	0.725954	0.695072	0.699665	0.71493	0.689286
	Sailfish	limma-trend	0.717117	0.699911	0.674589	0.645274	0.711061	0.728275	0.709411	0.594808	0.674106	0.724379	0.592074	0.669163	0.666932	0.757894	0.686281	0.724379	0.680741	0.731429	0.688212
HISAT2	Salmon	limma-trend	0.695877	0.693848	0.676634	0.676634	0.686281	0.67273	0.641704	0.627295	0.669163	0.712902	0.684245	0.69808	0.692002	0.711061	0.695877	0.693848	0.728275	0.728923	0.688077
Bowtie2	eXpress	limma-voom	0.717117	0.712902	0.688491	0.674589	0.681235	0.67273	0.668695	0.639762	0.661828	0.714924	0.674106	0.70998	0.683772	0.703399	0.619514	0.705424	0.720517	0.728923	0.687662
Bowtie2	Salmon	limma-trend	0.726574	0.718275	0.642606	0.660476	0.662299	0.716663	0.691978	0.618844	0.678596	0.712564	0.614415	0.629411	0.689609	0.731544	0.731544	0.712564	0.712564	0.719551	0.687227
Bowtie2	eXpress	NOISeq-real	0.712902	0.703399	0.705212	0.666703	0.681235	0.674366	0.668695	0.646881	0.678853	0.714717	0.656333	0.709545	0.690864	0.711061	0.603576	0.705424	0.718869	0.719261	0.687105
Bowtie2	eXpress	edgeR-GLM	0.717117	0.720517	0.686281	0.666932	0.681235	0.67273	0.668695	0.632308	0.644804	0.714924	0.674106	0.70998	0.690864	0.703399	0.625478	0.705424	0.720517	0.728923	0.686902
Bowtie2	eXpress	edgeR_QL	0.717117	0.720517	0.686281	0.666932	0.681235	0.67273	0.668695	0.632308	0.644804	0.714924	0.674106	0.70998	0.690864	0.703399	0.625478	0.705424	0.720517	0.728923	0.686902
HISAT2	RSEM	DESeq2	0.731429	0.731768	0.681235	0.65942	0.693848	0.703399	0.659853	0.57335	0.690864	0.690864	0.644804	0.653409	0.684245	0.719472	0.700444	0.700444	0.714924	0.727425	0.686733
STAR	featureCounts	limma-voom	0.686281	0.703399	0.676634	0.661828	0.69808	0.682394	0.672511	0.624992	0.654625	0.729926	0.693848	0.683772	0.682394	0.676634	0.695877	0.692002	0.709415	0.735982	0.6867
Bowtie2	featureCounts	limma-voom	0.688491	0.703399	0.674589	0.652045	0.695877	0.67273	0.67273	0.622348	0.669163	0.729926	0.711061	0.674106	0.684245	0.666932	0.695877	0.692002	0.718869	0.735982	0.686687
	Kallisto	limma-trend	0.717117	0.682394	0.682394	0.655106	0.678853	0.728275	0.701686	0.587522	0.674106	0.707621	0.639762	0.644804	0.684245	0.757894	0.69808	0.724379	0.684245	0.708428	0.686495
STAR	RSEM	limma-trend	0.731429	0.729926	0.657175	0.64962	0.674589	0.714924	0.662391	0.617031	0.686281	0.717117	0.647359	0.565024	0.684027	0.738335	0.72657	0.719472	0.728923	0.705627	0.686435
Bowtie2	Salmon	edgeR-qCML	0.726574	0.708767	0.662299	0.652482	0.672058	0.72612	0.684456	0.611383	0.668864	0.705177	0.614415	0.639358	0.681763	0.724242	0.731544	0.712564	0.712564	0.719551	0.686343
Bowtie2	eXpress	edgeR-qCML	0.717117	0.720517	0.678853	0.666932	0.681235	0.67273	0.668695	0.639762	0.644804	0.714924	0.674106	0.70998	0.683772	0.703399	0.619514	0.705424	0.720517	0.728923	0.686178
STAR	eXpress	NOISeq-real	0.745354	0.586889	0.735982	0.675765	0.683772	0.709764	0.668092	0.598823	0.717946	0.70998	0.675824	0.682051	0.671833	0.70998	0.605565	0.712492	0.741136	0.711361	0.6857
Bowtie2	eXpress	DESeq2	0.70998	0.701557	0.686281	0.666932	0.688491	0.67273	0.668695	0.624992	0.654625	0.714924	0.667099	0.702963	0.683772	0.703399	0.629508	0.712902	0.720517	0.731429	0.6856
STAR	featureCounts	edgeR-qCML	0.686281	0.684245	0.676634	0.661828	0.705424	0.682394	0.672511	0.624992	0.661828	0.722357	0.693848	0.683772	0.674589	0.676634	0.695877	0.692002	0.709415	0.735982	0.68559
Bowtie2	featureCounts	edgeR-GLM	0.695877	0.693848	0.657175	0.642206	0.695877	0.67273	0.67273	0.632308	0.661828	0.722357	0.720517	0.664391	0.692002	0.666932	0.695877	0.692002	0.718869	0.735982	0.685195
Bowtie2	featureCounts	edgeR_QL	0.695877	0.693848	0.657175	0.642206	0.695877	0.67273	0.67273	0.632308	0.661828	0.722357	0.720517	0.664391	0.692002	0.666932	0.695877	0.692002	0.718869	0.735982	0.685195
STAR	featureCounts	edgeR-GLM	0.686281	0.684245	0.676634	0.652045	0.705424	0.682394	0.672511	0.624992	0.652045	0.722357	0.693848	0.683772	0.684245	0.676634	0.695877	0.692002	0.709415	0.735982	0.685039
STAR	featureCounts	edgeR_QL	0.686281	0.684245	0.676634	0.652045	0.705424	0.682394	0.672511	0.624992	0.652045	0.722357	0.693848	0.683772	0.684245	0.676634	0.695877	0.692002	0.709415	0.735982	0.685039
HISAT2	featureCounts	edgeR-qCML	0.695877	0.684245	0.657175	0.661828	0.671558	0.67273	0.682179	0.624992	0.671558	0.729926	0.701557	0.664391	0.682394	0.676634	0.695877	0.692002	0.718869	0.745354	0.684953
STAR	featureCounts	DESeq2	0.686281	0.684245	0.669163	0.652045	0.705424	0.682394	0.682394	0.624992	0.652045	0.712902	0.693848	0.6768	0.692002	0.676634	0.695877	0.684245	0.709415	0.745354	0.684781
	Sailfish	limma-voom	0.717117	0.701557	0.67273	0.635379	0.684245	0.729926	0.709411	0.574341	0.644804	0.72657	0.612325	0.674589	0.647359	0.757894	0.686281	0.724379	0.690353	0.73408	0.68463
HISAT2	featureCounts	edgeR-GLM	0.695877	0.684245	0.657175	0.661828	0.671558	0.67273	0.682179	0.624992	0.671558	0.729926	0.693848	0.664391	0.682394	0.676634	0.695877	0.692002	0.718869	0.745354	0.684524
HISAT2	featureCounts	edgeR_QL	0.695877	0.684245	0.657175	0.661828	0.671558	0.67273	0.682179	0.624992	0.671558	0.729926	0.693848	0.664391	0.682394	0.676634	0.695877	0.692002	0.718869	0.745354	0.684524
STAR	Salmon	limma-voom	0.717117	0.720517	0.666932	0.652998	0.643378	0.714924	0.679336	0.581291	0.654625	0.724379	0.66465	0.634927	0.654644	0.719472	0.741136	0.700444	0.717117	0.731429	0.684407
Bowtie2	featureCounts	edgeR-qCML	0.695877	0.684245	0.666932	0.642206	0.695877	0.67273	0.67273	0.632308	0.661828	0.722357	0.720517	0.657349	0.684245	0.666932	0.695877	0.692002	0.718869	0.735982	0.684381
HISAT2	featureCounts	limma-voom	0.695877	0.693848	0.666932	0.661828	0.671558	0.67273	0.682179	0.624992	0.664391	0.729926	0.701557	0.647547	0.674589	0.676634	0.695877	0.692002	0.718869	0.745354	0.684261
HISAT2	featureCounts	DESeq2	0.695877	0.684245	0.657175	0.661828	0.671558	0.67273	0.692002	0.624992	0.671558	0.720517	0.703399	0.657349	0.682394	0.676634	0.695877	0.684245	0.718869	0.745354	0.684256
Bowtie2	featureCounts	DESeq2	0.688491	0.693848	0.674589	0.642206	0.695877	0.67273	0.682394	0.622348	0.654625	0.722357	0.712902	0.657349	0.692002	0.666932	0.695877	0.684245	0.718869	0.735982	0.68409
HISAT2	Salmon	NOISeq-real	0.729926	0.685837	0.705424	0.695661	0.688491	0.666932	0.651553	0.569517	0.654625	0.712902	0.654126	0.695598	0.685837	0.711061	0.678394	0.695877	0.704999	0.726366	0.684063
HISAT2	StringTie	DESeq2	0.714924	0.741136	0.671558	0.676634	0.64962	0.65942	0.680536	0.630434	0.679233	0.714924	0.661828	0.667099	0.634927	0.707621	0.696062	0.686453	0.712902	0.724634	0.683886
Bowtie2	Salmon	edgeR_QL	0.726574	0.679953	0.652482	0.652482	0.630807	0.72612	0.69413	0.611383	0.666504	0.705177	0.604291	0.631991	0.691415	0.724242	0.740974	0.712564	0.712564	0.729063	0.682929
Bowtie2	eXpress	limma-trend	0.69808	0.701557	0.686281	0.674589	0.678853	0.67273	0.668695	0.629842	0.661828	0.714924	0.674106	0.681235	0.690864	0.703399	0.615459	0.693848	0.711061	0.728923	0.682571
	Kallisto	limma-voom	0.707621	0.703399	0.664876	0.655106	0.639762	0.720517	0.709411	0.574341	0.654625	0.707621	0.629842	0.639762	0.65942	0.757894	0.724379	0.724379	0.684245	0.724634	0.682324
STAR	StringTie	DESeq2	0.702963	0.714924	0.629842	0.678853	0.671558	0.678853	0.710453	0.63467	0.646769	0.712902	0.639762	0.659956	0.667099	0.750463	0.671558	0.689272	0.702464	0.71515	0.682084
STAR	featureCounts	limma-trend	0.676634	0.693848	0.657175	0.64962	0.686281	0.682394	0.672511	0.614995	0.65942	0.722357	0.693848	0.688491	0.680741	0.684245	0.695877	0.692002	0.699911	0.72657	0.682051
Bowtie2	Salmon	edgeR-GLM	0.726574	0.670243	0.652482	0.652482	0.620784	0.72612	0.69413	0.618844	0.646862	0.705177	0.602177	0.622006	0.681763	0.724242	0.740974	0.712564	0.712564	0.729063	0.679947
HISAT2	Salmon	NOISeq-BIO	0.711061	0.676634	0.676634	0.693848	0.686281	0.666932	0.652045	0.580371	0.652045	0.720517	0.629842	0.686453	0.676634	0.711061	0.678853	0.705424	0.705424	0.72657	0.679813
HISAT2	RSEM	edgeR_QL	0.712492	0.720517	0.637482	0.657175	0.664876	0.711061	0.665078	0.572751	0.65942	0.690864	0.639762	0.637691	0.674366	0.72657	0.72657	0.700444	0.717117	0.71515	0.679411
Bowtie2	featureCounts	limma-trend	0.686281	0.693848	0.655106	0.64962	0.676634	0.663007	0.67273	0.622348	0.669163	0.712902	0.693848	0.661828	0.680741	0.666932	0.695877	0.692002	0.709415	0.72657	0.679381
HISAT2	RSEM	edgeR-GLM	0.712492	0.711061	0.637482	0.647359	0.655106	0.711061	0.655287	0.572751	0.65942	0.690864	0.639762	0.62778	0.674366	0.72657	0.72657	0.700444	0.717117	0.71515	0.676702
Bowtie2	RSEM	limma-voom	0.721981	0.701557	0.666932	0.627541	0.655106	0.722357	0.672146	0.545552	0.64962	0.724379	0.604935	0.584611	0.635141	0.735982	0.752492	0.719472	0.717117	0.74084	0.676542
HISAT2	featureCounts	limma-trend	0.686281	0.684245	0.647359	0.64962	0.642206	0.67273	0.682179	0.629842	0.669163	0.703399	0.684245	0.654625	0.67273	0.676634	0.703399	0.692002	0.699911	0.72657	0.676508
Bowtie2	Salmon	limma-voom	0.717063	0.718275	0.672058	0.622663	0.626989	0.718275	0.684456	0.58841	0.639358	0.712564	0.594096	0.609335	0.660476	0.714731	0.740974	0.712564	0.712564	0.719551	0.6758
STAR	RSEM	limma-voom	0.721981	0.720517	0.669163	0.629842	0.647359	0.714924	0.648303	0.591532	0.642206	0.717117	0.637482	0.539378	0.627295	0.728923	0.743161	0.719472	0.728923	0.71515	0.674596
HISAT2	RSEM	edgeR-qCML	0.702963	0.701557	0.637482	0.647359	0.643378	0.703399	0.66962	0.586955	0.65942	0.690864	0.619858	0.632308	0.66465	0.72657	0.717117	0.690864	0.717117	0.721981	0.674081
HISAT2	RSEM	limma-trend	0.702963	0.701557	0.627541	0.663007	0.679301	0.711061	0.652586	0.573775	0.674589	0.690864	0.609808	0.614995	0.654875	0.724379	0.69808	0.69808	0.717117	0.712492	0.672615
Bowtie2	eXpress	NOISeq-BIO	0.686742	0.682394	0.657709	0.655106	0.651545	0.696293	0.669163	0.645274	0.627354	0.729926	0.607161	0.678853	0.59765	0.718869	0.603576	0.695877	0.709415	0.719472	0.668466
STAR	eXpress	DESeq2	0.717117	0.577434	0.666932	0.630703	0.664876	0.722357	0.638258	0.556605	0.640591	0.724379	0.594808	0.660209	0.64021	0.738335	0.616939	0.70998	0.70998	0.736869	0.663699
Bowtie2	StringTie	DESeq2	0.687812	0.742969	0.62591	0.674143	0.632054	0.678059	0.66822	0.62778	0.63017	0.707621	0.619858	0.624992	0.6518	0.663842	0.653965	0.663842	0.687812	0.705734	0.663699
HISAT2	RSEM	limma-voom	0.69339	0.692002	0.637482	0.617533	0.625416	0.693848	0.676977	0.545552	0.629842	0.707621	0.609808	0.584611	0.615139	0.717117	0.72657	0.690864	0.717117	0.731429	0.661795
STAR	eXpress	edgeR_QL	0.686281	0.532278	0.653224	0.629842	0.623482	0.690353	0.64973	0.559682	0.602234	0.720517	0.589707	0.632308	0.642206	0.681235	0.634775	0.702963	0.724379	0.686453	0.646758
STAR	StringTie	limma-trend	0.64962	0.663007	0.589493	0.650085	0.595098	0.690353	0.660459	0.587077	0.589493	0.701557	0.57677	0.574341	0.647359	0.684245	0.661828	0.686281	0.693848	0.712492	0.645189
STAR	eXpress	edgeR-GLM	0.686281	0.517101	0.653224	0.629842	0.621754	0.690353	0.64973	0.566456	0.609808	0.711061	0.57935	0.639762	0.632308	0.681235	0.624899	0.702963	0.714924	0.686453	0.644306
STAR	StringTie	limma-voom	0.64962	0.635379	0.571532	0.641685	0.582791	0.682394	0.628146	0.574494	0.568874	0.709415	0.561938	0.581841	0.643378	0.693848	0.690864	0.695877	0.703399	0.712492	0.640443
HISAT2	StringTie	limma-trend	0.65942	0.653224	0.607455	0.661339	0.553539	0.67273	0.619567	0.571532	0.566379	0.720517	0.564062	0.607455	0.643378	0.676634	0.683772	0.669163	0.676634	0.712492	0.639961
Bowtie2	featureCounts	NOISeq-BIO	0.635379	0.601521	0.627541	0.599687	0.602234	0.637482	0.589707	0.574341	0.633465	0.679301	0.608875	0.682394	0.640213	0.67273	0.661339	0.663007	0.707977	0.700444	0.639869
HISAT2	StringTie	edgeR_QL	0.679301	0.659888	0.646808	0.657026	0.607188	0.646839	0.559302	0.561938	0.617301	0.685549	0.559785	0.599973	0.631756	0.645274	0.69339	0.676634	0.686281	0.686742	0.638943
Bowtie2	StringTie	limma-trend	0.635971	0.654875	0.603296	0.620024	0.603296	0.690688	0.660235	0.581567	0.584965	0.703399	0.593085	0.587077	0.643148	0.668255	0.642206	0.665776	0.648238	0.70998	0.638671
STAR	StringTie	edgeR_QL	0.686742	0.633465	0.649171	0.629024	0.617318	0.657673	0.551742	0.617999	0.596546	0.656604	0.534116	0.601521	0.641685	0.679301	0.671558	0.653224	0.692002	0.688916	0.636589
HISAT2	StringTie	edgeR-GLM	0.678091	0.650085	0.637297	0.647212	0.618171	0.626984	0.559302	0.570539	0.647156	0.676255	0.538195	0.607869	0.621754	0.645274	0.69339	0.647359	0.686281	0.686742	0.635442
STAR	StringTie	edgeR-GLM	0.686045	0.640213	0.629507	0.638008	0.617318	0.647927	0.530063	0.627354	0.586206	0.647156	0.559785	0.599973	0.641685	0.677129	0.671558	0.653224	0.680741	0.688916	0.6346
STAR	eXpress	edgeR-qCML	0.686281	0.557914	0.635379	0.609808	0.621754	0.699911	0.628441	0.521141	0.584611	0.711061	0.476708	0.627541	0.612325	0.671558	0.637275	0.702963	0.724379	0.705627	0.634149
HISAT2	StringTie	limma-voom	0.629842	0.635379	0.584838	0.650085	0.549414	0.67273	0.616676	0.564062	0.561938	0.717428	0.556927	0.587077	0.631756	0.676634	0.700444	0.65942	0.686281	0.702963	0.632438
STAR	featureCounts	NOISeq-BIO	0.623482	0.610153	0.627541	0.587522	0.609808	0.627541	0.568899	0.57729	0.615384	0.663007	0.607869	0.666932	0.621754	0.682394	0.631756	0.647359	0.699911	0.705424	0.63189
STAR	eXpress	limma-trend	0.676634	0.552615	0.60528	0.609808	0.591282	0.698474	0.618397	0.492612	0.57729	0.711061	0.477882	0.633465	0.612325	0.678853	0.64021	0.717117	0.714924	0.705627	0.628547
HISAT2	featureCounts	NOISeq-BIO	0.641685	0.610153	0.635379	0.584611	0.589493	0.627541	0.57935	0.535281	0.60528	0.655106	0.607869	0.664876	0.631756	0.67273	0.651545	0.632308	0.699911	0.688491	0.62852
Bowtie2	StringTie	limma-voom	0.627541	0.643148	0.593085	0.611442	0.57241	0.673295	0.630598	0.571254	0.57677	0.711061	0.540702	0.57677	0.64146	0.668255	0.652045	0.658397	0.641956	0.70998	0.627787
STAR	StringTie	edgeR-qCML	0.629842	0.633465	0.53731	0.621754	0.553539	0.653224	0.617135	0.57677	0.534668	0.699911	0.540702	0.550671	0.633465	0.684245	0.681235	0.676634	0.712902	0.70998	0.624858
HISAT2	StringTie	edgeR-qCML	0.619858	0.643378	0.57241	0.640213	0.568899	0.653224	0.59629	0.57677	0.540702	0.699911	0.515042	0.566379	0.601521	0.65942	0.69339	0.669163	0.695877	0.69808	0.622807
Bowtie2	StringTie	edgeR-qCML	0.615782	0.643148	0.561938	0.608652	0.549414	0.65357	0.636952	0.578954	0.531945	0.701557	0.547692	0.57677	0.651324	0.651151	0.652045	0.665776	0.658157	0.707621	0.621803
STAR	eXpress	limma-voom	0.657175	0.522042	0.623482	0.53731	0.560026	0.690353	0.595857	0.455629	0.561143	0.729926	0.388051	0.571532	0.561143	0.676634	0.64021	0.700444	0.714924	0.705627	0.605084
Bowtie2	featureCounts	NOISeq-real	0.58724	0.573173	0.56523	0.540417	0.578186	0.556313	0.486312	0.549177	0.567145	0.602813	0.561507	0.638462	0.604618	0.583041	0.58442	0.584438	0.61463	0.586702	0.575768
Bowtie2	StringTie	edgeR_QL	0.662635	0.646977	0.523008	0.557299	0.466551	0.562235	0.518837	0.554321	0.527575	0.546689	0.448962	0.568115	0.656756	0.59386	0.625416	0.672166	0.622184	0.566561	0.573341
STAR	Salmon	Sleuth	0.580825	0.568115	0.591159	0.523008	0.570369	0.545071	0.569397	0.570369	0.577111	0.611487	0.555883	0.577111	0.591	0.533136	0.599303	0.601377	0.546689	0.565609	0.570946
Bowtie2	StringTie	edgeR-GLM	0.642844	0.617134	0.511738	0.524507	0.466551	0.540352	0.507588	0.55429	0.527575	0.527172	0.448962	0.55747	0.629343	0.601901	0.623482	0.662369	0.570024	0.545071	0.558798
Bowtie2	Salmon	Sleuth	0.555523	0.544737	0.547247	0.542992	0.542992	0.532029	0.567512	0.544737	0.553812	0.589356	0.544737	0.542992	0.566174	0.542992	0.597388	0.589356	0.555523	0.541898	0.555666
STAR	featureCounts	NOISeq-real	0.575992	0.562338	0.555996	0.507497	0.565531	0.542776	0.46296	0.528259	0.545383	0.59197	0.537157	0.585177	0.581357	0.582759	0.562085	0.556627	0.572892	0.583636	0.555577
HISAT2	Salmon	Sleuth	0.55747	0.535761	0.55747	0.57863	0.580825	0.546689	0.559464	0.534116	0.555883	0.601377	0.523008	0.554919	0.580825	0.546689	0.555883	0.591159	0.511738	0.521634	0.555197
	Sailfish	Sleuth	0.570369	0.513432	0.570369	0.538195	0.580825	0.568115	0.558645	0.524679	0.566561	0.559785	0.530652	0.552335	0.530652	0.555883	0.573446	0.580825	0.54157	0.545071	0.553412
	Kallisto	Sleuth	0.570369	0.545071	0.570369	0.524679	0.568115	0.568115	0.558645	0.524679	0.566561	0.580825	0.546689	0.534116	0.535761	0.555883	0.545071	0.580825	0.524679	0.544097	0.552475
HISAT2	featureCounts	NOISeq-real	0.584725	0.570866	0.543408	0.509529	0.554982	0.542776	0.46296	0.449887	0.547562	0.582968	0.525037	0.583562	0.581357	0.572324	0.572892	0.546022	0.572609	0.583636	0.549283
	Sailfish	NOISeq-BIO	0.410201	0.4613	0.337682	0.423439	0.304576	0.43635	0.473387	0.368153	0.353203	0.4613	0.304576	0.410201	0.423439	0.49688	0.599303	0.54157	0.617318	0.519573	0.441247
HISAT2	StringTie	NOISeq-BIO	0.43635	0.43635	0.423439	0.396601	0.3826	0.423439	0.423172	0.3826	0.410201	0.448962	0.321508	0.448962	0.396601	0.49688	0.515983	0.552335	0.535761	0.49688	0.440479
	Kallisto	NOISeq-BIO	0.396601	0.4613	0.337682	0.43635	0.267851	0.43635	0.473387	0.368153	0.353203	0.448962	0.321508	0.3826	0.396601	0.508319	0.568115	0.54157	0.618171	0.485241	0.433442
STAR	StringTie	NOISeq-BIO	0.3826	0.43635	0.3826	0.396601	0.410201	0.423439	0.3826	0.396601	0.410201	0.423439	0.267851	0.43635	0.3826	0.485241	0.515983	0.485241	0.494624	0.49688	0.422745
Bowtie2	RSEM	NOISeq-BIO	0.410201	0.410201	0.337682	0.410201	0.304576	0.43635	0.4613	0.368153	0.353203	0.4613	0.321508	0.337682	0.3826	0.485241	0.43635	0.530652	0.508319	0.485241	0.413376
STAR	RSEM	NOISeq-BIO	0.410201	0.3826	0.337682	0.396601	0.28675	0.423439	0.461161	0.368153	0.353203	0.43635	0.321508	0.267851	0.3826	0.485241	0.485241	0.519573	0.49688	0.485241	0.405571
STAR	Salmon	NOISeq-BIO	0.396601	0.3826	0.337682	0.396601	0.247632	0.43635	0.436215	0.337682	0.353203	0.4613	0.28675	0.321508	0.368153	0.485241	0.448962	0.519573	0.49688	0.485241	0.399899
HISAT2	RSEM	NOISeq-BIO	0.3826	0.368153	0.321508	0.368153	0.28675	0.423439	0.448962	0.337682	0.337682	0.43635	0.337682	0.337682	0.353203	0.473387	0.473387	0.485241	0.508319	0.473387	0.39742
Bowtie2	StringTie	NOISeq-BIO	0.435545	0.410201	0.363087	0.334261	0.315707	0.435545	0.349788	0.31209	0.392098	0.391666	0.138686	0.380727	0.3826	0.458223	0.473292	0.458223	0.432708	0.405985	0.381691
Bowtie2	Salmon	NOISeq-BIO	0.381181	0.36677	0.303376	0.381181	0.246623	0.408718	0.408578	0.320256	0.320256	0.421929	0.246623	0.266771	0.35186	0.47179	0.47179	0.47179	0.50668	0.459722	0.378105
HISAT2	StringTie	Ballgown	0.2014	0.250939	0.0506219	0.127119	0.180691	0.15067	0.267887	0.104784	0.0908126	0.362198	0.132217	0.098521	0.208164	0.303857	0.300855	0.276454	0.276623	0.256846	0.202259
Bowtie2	StringTie	Ballgown	0.172368	0.236339	0.0721415	0.148418	0.170346	0.196628	0.329775	0.00709451	0.163363	0.4034	0.11557	0.100391	0.202519	0.162799	0.270302	0.274602	0.316267	0.268845	0.20062
HISAT2	StringTie	Ballgown	0.194652	0.215159	0.148149	0.128323	0.153582	0.112821	0.234543	0.00203242	0.085651	0.358038	0.134894	0.100391	0.201624	0.199352	0.281735	0.280047	0.282256	0.22787	0.185618
STAR	eXpress	NOISeq-BIO	0.174367	0.0896902	0.174367	0.142172	0.100391	0.174367	0.174367	NaN	0.142172	0.225739	0.100391	0.100391	0.142172	0.225739	0.194985	0.225739	0.225739	0.225739	0.166972
Since the data of lab28 failed to be quantified by RSEM, the data of lab28 were deleted during the comparison.
