# Supplementary material for: Benchmarking RNA-seq with the Quartet Reference Materials to establish Best Practices for Accurate Alternative Splicing Detection
Source: Research Square preprint supplement (doi:10.21203/rs.3.rs-7716867/v1), 2025-11-05
Supplement: Supplementary file 3 [file ac8c81b222e5dcfdfc157fcd.xlsx]

## Sheet: sheet1
Supplementary Data 6. RNA-seq analysis tools, versions, and parameters used in the benchmark study.
Work	Tool	Version	Task	Parameters other than default conditions
Trimming	fastp	0.23.2		-q 20 -l 50
Alignment	STAR	2.7.10b	genome alignment	"--twopassMode Basic --outSAMunmapped Within" and "--outSAMstrandField intronMotif --outSAMattributes All --outSAMunmapped Within --outFilterIntronMotifs RemoveNoncanonical --quantMode GeneCounts --twopassMode Basic" for Cuffdiff
	STAR	2.7.10b	transcriptome alignment	--outSAMattributes All --quantMode TranscriptomeSAM --quantTranscriptomeBan Singleend --twopassMode Basic'
	HISAT2	2.2.1	genome alignment	--dta-cufflinks (for Cuffdiff)
	HISAT2	2.2.1	transcriptome alignment	default parameter when using RSEM
	Subjunc	2.0.8	genome alignment	--multiMapping --allJunctions
	Bowtie2	2.5.4	transcriptome alignment	--no-mixed --no-discordant
Quantification	StringTie	3.0.0		-e
	featureCounts	2.0.8		-g transcript_id -O -M -p --countReadPairs
	RSEM	1.3.3		"--hisat2-hca" or "--star" or "--bowtie2"
	eXpress	1.5.1
	Salmon	1.10.1		--numBootstraps 100 --validateMappings --gcBias -- seqBias --posBias
	Kallisto	0.51.1
	Sailfish	0.10.0		--numBootstraps 100
	Cuffdiff	2.2.1		-u
Differential isoform expression analysis	edgeR	4.4.2		gCML, GLM, QL mode
	limma	3.62.2		trend, voom mode
	NOISeq	2.50.0		real, BIO mode
	DESeq2	1.46.0
	Ballgown	2.38.0
	Sleuth	0.30.1
	Cuffdiff	2.2.1
Alternative splicing event analysis	SUPPA2	2.4
	MAJIQ	2.5.6
	PSI-Sigma	2.3
	rMATS	4.3.0
