# Supplementary material for: Benchmarking RNA-seq with the Quartet Reference Materials to establish Best Practices for Accurate Alternative Splicing Detection
Source: Research Square preprint supplement (doi:10.21203/rs.3.rs-7716867/v1), 2025-11-05
Supplement: Supplementary file 4 [file c68855251ae2385ec2aa6a07.xlsx]

## Sheet: Sheet1
Supplementary Data 2. Experimental factors involved in PVCA analysis.
Samples	RNA_input	enrichment	stranded	kit_brand	library_kit	reads_length	Library.concentrations	Sequencing_platform	Sequencing_instrument	flowcell	lane	exonic_reads	insert_size	source
lab1_202207	1000	PolyA(+)_enrichment	FALSE	VAHTS	VAHTS_Universal_V8_RNA-seq_Library_Prep_Kit_for_Illumina	150	31.2	Novaseq 6000	A00474	HGCMGDSX3	HGCMGDSX3_lane01	41779616	515	M8
lab1_202208	1000	PolyA(+)_enrichment	FALSE	VAHTS	VAHTS_Universal_V8_RNA-seq_Library_Prep_Kit_for_Illumina	150	34.4	Novaseq 6000	A00474	HGCMGDSX3	HGCMGDSX3_lane01	39348256	545	M8
lab1_202209	1000	PolyA(+)_enrichment	FALSE	VAHTS	VAHTS_Universal_V8_RNA-seq_Library_Prep_Kit_for_Illumina	150	38	Novaseq 6000	A00474	HGCMGDSX3	HGCMGDSX3_lane01	41968978	488	M8
lab1_202210	1000	PolyA(+)_enrichment	FALSE	VAHTS	VAHTS_Universal_V8_RNA-seq_Library_Prep_Kit_for_Illumina	150	37.2	Novaseq 6000	A00474	HGCMGDSX3	HGCMGDSX3_lane01	40525528	545	F7
lab1_202211	1000	PolyA(+)_enrichment	FALSE	VAHTS	VAHTS_Universal_V8_RNA-seq_Library_Prep_Kit_for_Illumina	150	39	Novaseq 6000	A00474	HGCMGDSX3	HGCMGDSX3_lane01	38411139	527	F7
lab1_202212	1000	PolyA(+)_enrichment	FALSE	VAHTS	VAHTS_Universal_V8_RNA-seq_Library_Prep_Kit_for_Illumina	150	41.2	Novaseq 6000	A00474	HGCMGDSX3	HGCMGDSX3_lane01	45775932	556	F7
lab1_202213	1000	PolyA(+)_enrichment	FALSE	VAHTS	VAHTS_Universal_V8_RNA-seq_Library_Prep_Kit_for_Illumina	150	51.6	Novaseq 6000	A00474	HGCMGDSX3	HGCMGDSX3_lane01	40140491	594	D5
lab1_202214	1000	PolyA(+)_enrichment	FALSE	VAHTS	VAHTS_Universal_V8_RNA-seq_Library_Prep_Kit_for_Illumina	150	48.8	Novaseq 6000	A00474	HGCMGDSX3	HGCMGDSX3_lane01	40933604	567	D5
lab1_202215	1000	PolyA(+)_enrichment	FALSE	VAHTS	VAHTS_Universal_V8_RNA-seq_Library_Prep_Kit_for_Illumina	150	46.6	Novaseq 6000	A00474	HGCMGDSX3	HGCMGDSX3_lane01	40675155	559	D5
lab1_202216	1000	PolyA(+)_enrichment	FALSE	VAHTS	VAHTS_Universal_V8_RNA-seq_Library_Prep_Kit_for_Illumina	150	41.6	Novaseq 6000	A00474	HGCMGDSX3	HGCMGDSX3_lane01	36979061	512	T1
lab1_202217	1000	PolyA(+)_enrichment	FALSE	VAHTS	VAHTS_Universal_V8_RNA-seq_Library_Prep_Kit_for_Illumina	150	39.4	Novaseq 6000	A00474	HGCMGDSX3	HGCMGDSX3_lane01	42822480	495	T1
lab1_202218	1000	PolyA(+)_enrichment	FALSE	VAHTS	VAHTS_Universal_V8_RNA-seq_Library_Prep_Kit_for_Illumina	150	33.6	Novaseq 6000	A00474	HGCMGDSX3	HGCMGDSX3_lane01	41940062	536	T1
lab1_202219	1000	PolyA(+)_enrichment	FALSE	VAHTS	VAHTS_Universal_V8_RNA-seq_Library_Prep_Kit_for_Illumina	150	39.4	Novaseq 6000	A00474	HGCMGDSX3	HGCMGDSX3_lane01	39728930	569	T2
lab1_202220	1000	PolyA(+)_enrichment	FALSE	VAHTS	VAHTS_Universal_V8_RNA-seq_Library_Prep_Kit_for_Illumina	150	36.6	Novaseq 6000	A00474	HGCMGDSX3	HGCMGDSX3_lane01	47827162	552	T2
lab1_202221	1000	PolyA(+)_enrichment	FALSE	VAHTS	VAHTS_Universal_V8_RNA-seq_Library_Prep_Kit_for_Illumina	150	33.4	Novaseq 6000	A00474	HGCMGDSX3	HGCMGDSX3_lane01	49522764	550	T2
lab1_202222	1000	PolyA(+)_enrichment	FALSE	VAHTS	VAHTS_Universal_V8_RNA-seq_Library_Prep_Kit_for_Illumina	150	33.6	Novaseq 6000	A00474	HGCMGDSX3	HGCMGDSX3_lane01	40728081	535	D6
lab1_202223	1000	PolyA(+)_enrichment	FALSE	VAHTS	VAHTS_Universal_V8_RNA-seq_Library_Prep_Kit_for_Illumina	150	30	Novaseq 6000	A00474	HGCMGDSX3	HGCMGDSX3_lane01	36039748	583	D6
lab1_202224	1000	PolyA(+)_enrichment	FALSE	VAHTS	VAHTS_Universal_V8_RNA-seq_Library_Prep_Kit_for_Illumina	150	30.4	Novaseq 6000	A00474	HGCMGDSX3	HGCMGDSX3_lane01	43333155	574	D6
lab4_202207	1000	rRNA_depletion	TRUE	VAHTS	VAHTS_Total_RNA-seq_(H/M/R)_Library_Prep_Kit_for_Illumina	150	45.8	Novaseq 6000	A00838	HMTWYDSX3	HMTWYDSX3_lane04	76366230	254	M8
lab4_202208	1000	rRNA_depletion	TRUE	VAHTS	VAHTS_Total_RNA-seq_(H/M/R)_Library_Prep_Kit_for_Illumina	150	50.6	Novaseq 6000	A00838	HMTWYDSX3	HMTWYDSX3_lane04	61736540	276	M8
lab4_202209	1000	rRNA_depletion	TRUE	VAHTS	VAHTS_Total_RNA-seq_(H/M/R)_Library_Prep_Kit_for_Illumina	150	39	Novaseq 6000	A00838	HMTWYDSX3	HMTWYDSX3_lane04	55481721	251	M8
lab4_202210	1000	rRNA_depletion	TRUE	VAHTS	VAHTS_Total_RNA-seq_(H/M/R)_Library_Prep_Kit_for_Illumina	150	37.4	Novaseq 6000	A00838	HMTWYDSX3	HMTWYDSX3_lane04	72993822	235	F7
lab4_202211	1000	rRNA_depletion	TRUE	VAHTS	VAHTS_Total_RNA-seq_(H/M/R)_Library_Prep_Kit_for_Illumina	150	37.4	Novaseq 6000	A00838	HMTWYDSX3	HMTWYDSX3_lane04	81775993	254	F7
lab4_202212	1000	rRNA_depletion	TRUE	VAHTS	VAHTS_Total_RNA-seq_(H/M/R)_Library_Prep_Kit_for_Illumina	150	33.2	Novaseq 6000	A00838	HMTWYDSX3	HMTWYDSX3_lane04	78960003	283	F7
lab4_202213	1000	rRNA_depletion	TRUE	VAHTS	VAHTS_Total_RNA-seq_(H/M/R)_Library_Prep_Kit_for_Illumina	150	36.6	Novaseq 6000	A00838	HMTWYDSX3	HMTWYDSX3_lane04	110275510	258	D5
lab4_202214	1000	rRNA_depletion	TRUE	VAHTS	VAHTS_Total_RNA-seq_(H/M/R)_Library_Prep_Kit_for_Illumina	150	30.4	Novaseq 6000	A00838	HMTWYDSX3	HMTWYDSX3_lane04	84033980	263	D5
lab4_202215	1000	rRNA_depletion	TRUE	VAHTS	VAHTS_Total_RNA-seq_(H/M/R)_Library_Prep_Kit_for_Illumina	150	36.4	Novaseq 6000	A00838	HMTWYDSX3	HMTWYDSX3_lane04	90252987	251	D5
lab4_202216	1000	rRNA_depletion	TRUE	VAHTS	VAHTS_Total_RNA-seq_(H/M/R)_Library_Prep_Kit_for_Illumina	150	38.4	Novaseq 6000	A00838	HMTWYDSX3	HMTWYDSX3_lane04	85142985	256	T1
lab4_202217	1000	rRNA_depletion	TRUE	VAHTS	VAHTS_Total_RNA-seq_(H/M/R)_Library_Prep_Kit_for_Illumina	150	38.8	Novaseq 6000	A00838	HMTWYDSX3	HMTWYDSX3_lane04	79843836	268	T1
lab4_202218	1000	rRNA_depletion	TRUE	VAHTS	VAHTS_Total_RNA-seq_(H/M/R)_Library_Prep_Kit_for_Illumina	150	40.2	Novaseq 6000	A00838	HMTWYDSX3	HMTWYDSX3_lane04	73714237	247	T1
lab4_202219	1000	rRNA_depletion	TRUE	VAHTS	VAHTS_Total_RNA-seq_(H/M/R)_Library_Prep_Kit_for_Illumina	150	32.8	Novaseq 6000	A00838	HMTWYDSX3	HMTWYDSX3_lane04	78461601	251	T2
lab4_202220	1000	rRNA_depletion	TRUE	VAHTS	VAHTS_Total_RNA-seq_(H/M/R)_Library_Prep_Kit_for_Illumina	150	38.4	Novaseq 6000	A00838	HMTWYDSX3	HMTWYDSX3_lane04	95812996	247	T2
lab4_202221	1000	rRNA_depletion	TRUE	VAHTS	VAHTS_Total_RNA-seq_(H/M/R)_Library_Prep_Kit_for_Illumina	150	34.8	Novaseq 6000	A00838	HMTWYDSX3	HMTWYDSX3_lane04	97247627	263	T2
lab4_202222	1000	rRNA_depletion	TRUE	VAHTS	VAHTS_Total_RNA-seq_(H/M/R)_Library_Prep_Kit_for_Illumina	150	36.2	Novaseq 6000	A00838	HMTWYDSX3	HMTWYDSX3_lane04	82215538	284	D6
lab4_202223	1000	rRNA_depletion	TRUE	VAHTS	VAHTS_Total_RNA-seq_(H/M/R)_Library_Prep_Kit_for_Illumina	150	40.8	Novaseq 6000	A00838	HMTWYDSX3	HMTWYDSX3_lane04	94596000	239	D6
lab4_202224	1000	rRNA_depletion	TRUE	VAHTS	VAHTS_Total_RNA-seq_(H/M/R)_Library_Prep_Kit_for_Illumina	150	32.4	Novaseq 6000	A00838	HMTWYDSX3	HMTWYDSX3_lane04	81091621	237	D6
lab5_202207	1000	PolyA(+)_enrichment	FALSE	VAHTS	VAHTS_Universal_V8_RNA-seq_Library_Prep_Kit_for_Illumina	150	3.82	Novaseq 6000	A00151	HKYCLDSX3	HKYCLDSX3_lane04	42398387	295	M8
lab5_202208	1000	PolyA(+)_enrichment	FALSE	VAHTS	VAHTS_Universal_V8_RNA-seq_Library_Prep_Kit_for_Illumina	150	3.74	Novaseq 6000	A00151	HKYCLDSX3	HKYCLDSX3_lane03	37728491	293	M8
lab5_202209	1000	PolyA(+)_enrichment	FALSE	VAHTS	VAHTS_Universal_V8_RNA-seq_Library_Prep_Kit_for_Illumina	150	8.75	Novaseq 6000	A00151	HL7HKDSX3	HL7HKDSX3_lane01	44390566	303	M8
lab5_202210	1000	PolyA(+)_enrichment	FALSE	VAHTS	VAHTS_Universal_V8_RNA-seq_Library_Prep_Kit_for_Illumina	150	4.83	Novaseq 6000	A00151	HL7HKDSX3	HL7HKDSX3_lane01	31379561	304	F7
lab5_202211	1000	PolyA(+)_enrichment	FALSE	VAHTS	VAHTS_Universal_V8_RNA-seq_Library_Prep_Kit_for_Illumina	150	5.06	Novaseq 6000	A00151	HL7HKDSX3	HL7HKDSX3_lane01	41575651	306	F7
lab5_202212	1000	PolyA(+)_enrichment	FALSE	VAHTS	VAHTS_Universal_V8_RNA-seq_Library_Prep_Kit_for_Illumina	150	6.46	Novaseq 6000	A00151	HL7HKDSX3	HL7HKDSX3_lane01	43647887	307	F7
lab5_202213	1000	PolyA(+)_enrichment	FALSE	VAHTS	VAHTS_Universal_V8_RNA-seq_Library_Prep_Kit_for_Illumina	150	4.8	Novaseq 6000	A00151	HL7HKDSX3	HL7HKDSX3_lane01	44081878	313	D5
lab5_202214	1000	PolyA(+)_enrichment	FALSE	VAHTS	VAHTS_Universal_V8_RNA-seq_Library_Prep_Kit_for_Illumina	150	4.92	Novaseq 6000	A00151	HL7HKDSX3	HL7HKDSX3_lane01	46823442	316	D5
lab5_202215	1000	PolyA(+)_enrichment	FALSE	VAHTS	VAHTS_Universal_V8_RNA-seq_Library_Prep_Kit_for_Illumina	150	5.87	Novaseq 6000	A00151	HL7HKDSX3	HL7HKDSX3_lane01	40190820	316	D5
lab5_202216	1000	PolyA(+)_enrichment	FALSE	VAHTS	VAHTS_Universal_V8_RNA-seq_Library_Prep_Kit_for_Illumina	150	4.66	Novaseq 6000	A00151	HL7HKDSX3	HL7HKDSX3_lane01	40308767	293	T1
lab5_202217	1000	PolyA(+)_enrichment	FALSE	VAHTS	VAHTS_Universal_V8_RNA-seq_Library_Prep_Kit_for_Illumina	150	4.41	Novaseq 6000	A00151	HL7HKDSX3	HL7HKDSX3_lane01	38776307	281	T1
lab5_202218	1000	PolyA(+)_enrichment	FALSE	VAHTS	VAHTS_Universal_V8_RNA-seq_Library_Prep_Kit_for_Illumina	150	7.3	Novaseq 6000	A00151	HL7HKDSX3	HL7HKDSX3_lane01	39770467	283	T1
lab5_202219	1000	PolyA(+)_enrichment	FALSE	VAHTS	VAHTS_Universal_V8_RNA-seq_Library_Prep_Kit_for_Illumina	150	6.09	Novaseq 6000	A00151	HL7HKDSX3	HL7HKDSX3_lane01	42236837	285	T2
lab5_202220	1000	PolyA(+)_enrichment	FALSE	VAHTS	VAHTS_Universal_V8_RNA-seq_Library_Prep_Kit_for_Illumina	150	5.57	Novaseq 6000	A00151	HL7HKDSX3	HL7HKDSX3_lane01	40521732	287	T2
lab5_202221	1000	PolyA(+)_enrichment	FALSE	VAHTS	VAHTS_Universal_V8_RNA-seq_Library_Prep_Kit_for_Illumina	150	4.31	Novaseq 6000	A00151	HL7HKDSX3	HL7HKDSX3_lane01	43126283	284	T2
lab5_202222	1000	PolyA(+)_enrichment	FALSE	VAHTS	VAHTS_Universal_V8_RNA-seq_Library_Prep_Kit_for_Illumina	150	4.34	Novaseq 6000	A00151	HL7HKDSX3	HL7HKDSX3_lane01	38767177	288	D6
lab5_202223	1000	PolyA(+)_enrichment	FALSE	VAHTS	VAHTS_Universal_V8_RNA-seq_Library_Prep_Kit_for_Illumina	150	5.33	Novaseq 6000	A00151	HL7HKDSX3	HL7HKDSX3_lane01	42793395	289	D6
lab5_202224	1000	PolyA(+)_enrichment	FALSE	VAHTS	VAHTS_Universal_V8_RNA-seq_Library_Prep_Kit_for_Illumina	150	6	Novaseq 6000	A00151	HL7HKDSX3	HL7HKDSX3_lane01	45768488	285	D6
lab8_202207	1000	rRNA_depletion	TRUE	VAHTS	VAHTS_Total_RNA-seq_(H/M/R)_Library_Prep_Kit_for_Illumina	150	48.3	Hiseq X ten	E00559	HHYJCCCX2	HHYJCCCX2_lane02	32215200	234	M8
lab8_202208	1000	rRNA_depletion	TRUE	VAHTS	VAHTS_Total_RNA-seq_(H/M/R)_Library_Prep_Kit_for_Illumina	150	40.4	Hiseq X ten	E00559	HHYJCCCX2	HHYJCCCX2_lane01	35001020	225	M8
lab8_202209	1000	rRNA_depletion	TRUE	VAHTS	VAHTS_Total_RNA-seq_(H/M/R)_Library_Prep_Kit_for_Illumina	150	41	Hiseq X ten	E00559	HHYJCCCX2	HHYJCCCX2_lane01	36885024	229	M8
lab8_202210	1000	rRNA_depletion	TRUE	VAHTS	VAHTS_Total_RNA-seq_(H/M/R)_Library_Prep_Kit_for_Illumina	150	42.9	Hiseq X ten	E00559	HHYJCCCX2	HHYJCCCX2_lane01	34342254	234	F7
lab8_202211	1000	rRNA_depletion	TRUE	VAHTS	VAHTS_Total_RNA-seq_(H/M/R)_Library_Prep_Kit_for_Illumina	150	40.9	Hiseq X ten	E00559	HHYJCCCX2	HHYJCCCX2_lane01	36800312	229	F7
lab8_202212	1000	rRNA_depletion	TRUE	VAHTS	VAHTS_Total_RNA-seq_(H/M/R)_Library_Prep_Kit_for_Illumina	150	44.6	Hiseq X ten	E00559	HHYJCCCX2	HHYJCCCX2_lane01	29168442	237	F7
lab8_202213	1000	rRNA_depletion	TRUE	VAHTS	VAHTS_Total_RNA-seq_(H/M/R)_Library_Prep_Kit_for_Illumina	150	40.4	Hiseq X ten	E00559	HHYJCCCX2	HHYJCCCX2_lane01	33992118	237	D5
lab8_202214	1000	rRNA_depletion	TRUE	VAHTS	VAHTS_Total_RNA-seq_(H/M/R)_Library_Prep_Kit_for_Illumina	150	41.3	Hiseq X ten	E00559	HHYJCCCX2	HHYJCCCX2_lane01	38369082	234	D5
lab8_202215	1000	rRNA_depletion	TRUE	VAHTS	VAHTS_Total_RNA-seq_(H/M/R)_Library_Prep_Kit_for_Illumina	150	45.8	Hiseq X ten	E00559	HHYJCCCX2	HHYJCCCX2_lane01	30375400	236	D5
lab8_202216	1000	rRNA_depletion	TRUE	VAHTS	VAHTS_Total_RNA-seq_(H/M/R)_Library_Prep_Kit_for_Illumina	150	42.3	Hiseq X ten	E00559	HHYJCCCX2	HHYJCCCX2_lane03	33341798	224	T1
lab8_202217	1000	rRNA_depletion	TRUE	VAHTS	VAHTS_Total_RNA-seq_(H/M/R)_Library_Prep_Kit_for_Illumina	150	42.7	Hiseq X ten	E00559	HHYJCCCX2	HHYJCCCX2_lane03	41455040	225	T1
lab8_202218	1000	rRNA_depletion	TRUE	VAHTS	VAHTS_Total_RNA-seq_(H/M/R)_Library_Prep_Kit_for_Illumina	150	47.3	Hiseq X ten	E00559	HHYJCCCX2	HHYJCCCX2_lane03	32175450	232	T1
lab8_202219	1000	rRNA_depletion	TRUE	VAHTS	VAHTS_Total_RNA-seq_(H/M/R)_Library_Prep_Kit_for_Illumina	150	44.4	Hiseq X ten	E00559	HHYJCCCX2	HHYJCCCX2_lane03	34839606	214	T2
lab8_202220	1000	rRNA_depletion	TRUE	VAHTS	VAHTS_Total_RNA-seq_(H/M/R)_Library_Prep_Kit_for_Illumina	150	44.6	Hiseq X ten	E00559	HHYJCCCX2	HHYJCCCX2_lane03	32699906	230	T2
lab8_202221	1000	rRNA_depletion	TRUE	VAHTS	VAHTS_Total_RNA-seq_(H/M/R)_Library_Prep_Kit_for_Illumina	150	48	Hiseq X ten	E00559	HHYJCCCX2	HHYJCCCX2_lane03	32607966	219	T2
lab8_202222	1000	rRNA_depletion	TRUE	VAHTS	VAHTS_Total_RNA-seq_(H/M/R)_Library_Prep_Kit_for_Illumina	150	45.8	Hiseq X ten	E00559	HHYJCCCX2	HHYJCCCX2_lane03	37906754	226	D6
lab8_202223	1000	rRNA_depletion	TRUE	VAHTS	VAHTS_Total_RNA-seq_(H/M/R)_Library_Prep_Kit_for_Illumina	150	44	Hiseq X ten	E00559	HHYJCCCX2	HHYJCCCX2_lane03	36332026	234	D6
lab8_202224	1000	rRNA_depletion	TRUE	VAHTS	VAHTS_Total_RNA-seq_(H/M/R)_Library_Prep_Kit_for_Illumina	150	47	Hiseq X ten	E00559	HHYJCCCX2	HHYJCCCX2_lane02	31525736	222	D6
lab11_202207	500	PolyA(+)_enrichment	TRUE	VAHTS	VAHTS_Universal_V6_RNA-seq_Library_Prep_Kit_for_Illumina	150	32.6	NovaSeq 6000	A00151	HL7CHDSX3	HL7CHDSX3_lane04	34969368	211	M8
lab11_202208	500	PolyA(+)_enrichment	TRUE	VAHTS	VAHTS_Universal_V6_RNA-seq_Library_Prep_Kit_for_Illumina	150	23.2	NovaSeq 6000	A00151	HL7CHDSX3	HL7CHDSX3_lane04	35052655	211	M8
lab11_202209	500	PolyA(+)_enrichment	TRUE	VAHTS	VAHTS_Universal_V6_RNA-seq_Library_Prep_Kit_for_Illumina	150	34.4	NovaSeq 6000	A00151	HL7CHDSX3	HL7CHDSX3_lane04	34764971	185	M8
lab11_202210	500	PolyA(+)_enrichment	TRUE	VAHTS	VAHTS_Universal_V6_RNA-seq_Library_Prep_Kit_for_Illumina	150	30.4	NovaSeq 6000	A00151	HL7CHDSX3	HL7CHDSX3_lane04	33011948	194	F7
lab11_202211	500	PolyA(+)_enrichment	TRUE	VAHTS	VAHTS_Universal_V6_RNA-seq_Library_Prep_Kit_for_Illumina	150	33.7	NovaSeq 6000	A00151	HL7CHDSX3	HL7CHDSX3_lane04	35578073	195	F7
lab11_202212	500	PolyA(+)_enrichment	TRUE	VAHTS	VAHTS_Universal_V6_RNA-seq_Library_Prep_Kit_for_Illumina	150	30.8	NovaSeq 6000	A00151	HL7CHDSX3	HL7CHDSX3_lane04	32680283	195	F7
lab11_202213	500	PolyA(+)_enrichment	TRUE	VAHTS	VAHTS_Universal_V6_RNA-seq_Library_Prep_Kit_for_Illumina	150	23.2	NovaSeq 6000	A00151	HL7CHDSX3	HL7CHDSX3_lane04	34777531	206	D5
lab11_202214	500	PolyA(+)_enrichment	TRUE	VAHTS	VAHTS_Universal_V6_RNA-seq_Library_Prep_Kit_for_Illumina	150	36.8	NovaSeq 6000	A00151	HL7CHDSX3	HL7CHDSX3_lane04	37256069	199	D5
lab11_202215	500	PolyA(+)_enrichment	TRUE	VAHTS	VAHTS_Universal_V6_RNA-seq_Library_Prep_Kit_for_Illumina	150	27.5	NovaSeq 6000	A00151	HL7CHDSX3	HL7CHDSX3_lane04	35630614	198	D5
lab11_202216	500	PolyA(+)_enrichment	TRUE	VAHTS	VAHTS_Universal_V6_RNA-seq_Library_Prep_Kit_for_Illumina	150	32.4	NovaSeq 6000	A00151	HL7CHDSX3	HL7CHDSX3_lane04	36164017	191	T1
lab11_202217	500	PolyA(+)_enrichment	TRUE	VAHTS	VAHTS_Universal_V6_RNA-seq_Library_Prep_Kit_for_Illumina	150	28.1	NovaSeq 6000	A00151	HL7CHDSX3	HL7CHDSX3_lane04	35170085	199	T1
lab11_202218	500	PolyA(+)_enrichment	TRUE	VAHTS	VAHTS_Universal_V6_RNA-seq_Library_Prep_Kit_for_Illumina	150	30.1	NovaSeq 6000	A00151	HL7CHDSX3	HL7CHDSX3_lane04	36398001	201	T1
lab11_202219	500	PolyA(+)_enrichment	TRUE	VAHTS	VAHTS_Universal_V6_RNA-seq_Library_Prep_Kit_for_Illumina	150	27.9	NovaSeq 6000	A00151	HL7CHDSX3	HL7CHDSX3_lane04	33856773	202	T2
lab11_202220	500	PolyA(+)_enrichment	TRUE	VAHTS	VAHTS_Universal_V6_RNA-seq_Library_Prep_Kit_for_Illumina	150	35.3	NovaSeq 6000	A00151	HL7CHDSX3	HL7CHDSX3_lane04	35190313	203	T2
lab11_202221	500	PolyA(+)_enrichment	TRUE	VAHTS	VAHTS_Universal_V6_RNA-seq_Library_Prep_Kit_for_Illumina	150	30.5	NovaSeq 6000	A00151	HL7CHDSX3	HL7CHDSX3_lane04	34752934	203	T2
lab11_202222	500	PolyA(+)_enrichment	TRUE	VAHTS	VAHTS_Universal_V6_RNA-seq_Library_Prep_Kit_for_Illumina	150	30.9	NovaSeq 6000	A00151	HL7CHDSX3	HL7CHDSX3_lane04	33952033	204	D6
lab11_202223	500	PolyA(+)_enrichment	TRUE	VAHTS	VAHTS_Universal_V6_RNA-seq_Library_Prep_Kit_for_Illumina	150	31.1	NovaSeq 6000	A00151	HL7CHDSX3	HL7CHDSX3_lane04	33950179	203	D6
lab11_202224	500	PolyA(+)_enrichment	TRUE	VAHTS	VAHTS_Universal_V6_RNA-seq_Library_Prep_Kit_for_Illumina	150	30.2	NovaSeq 6000	A00151	HL7CHDSX3	HL7CHDSX3_lane04	35681876	205	D6
lab13_202207	1000	PolyA(+)_enrichment	FALSE	VAHTS	VAHTS_Universal_V6_RNA-seq_Library_Prep_Kit_for_Illumina	150	13.6	NovaSeq 6000	A00511	HJCLHDSX3	HJCLHDSX3_lane02	61590518	485	M8
lab13_202208	1000	PolyA(+)_enrichment	FALSE	VAHTS	VAHTS_Universal_V6_RNA-seq_Library_Prep_Kit_for_Illumina	150	20.6	NovaSeq 6000	A00511	HJCLHDSX3	HJCLHDSX3_lane02	65818367	506	M8
lab13_202209	1000	PolyA(+)_enrichment	FALSE	VAHTS	VAHTS_Universal_V6_RNA-seq_Library_Prep_Kit_for_Illumina	150	21.8	NovaSeq 6000	A00511	HJCLHDSX3	HJCLHDSX3_lane02	58751181	498	M8
lab13_202210	1000	PolyA(+)_enrichment	FALSE	VAHTS	VAHTS_Universal_V6_RNA-seq_Library_Prep_Kit_for_Illumina	150	20.2	NovaSeq 6000	A00511	HJCLHDSX3	HJCLHDSX3_lane02	56083355	528	F7
lab13_202211	1000	PolyA(+)_enrichment	FALSE	VAHTS	VAHTS_Universal_V6_RNA-seq_Library_Prep_Kit_for_Illumina	150	17.8	NovaSeq 6000	A00511	HJCLHDSX3	HJCLHDSX3_lane02	62299845	518	F7
lab13_202212	1000	PolyA(+)_enrichment	FALSE	VAHTS	VAHTS_Universal_V6_RNA-seq_Library_Prep_Kit_for_Illumina	150	20.6	NovaSeq 6000	A00511	HJCLHDSX3	HJCLHDSX3_lane02	65633240	523	F7
lab13_202213	1000	PolyA(+)_enrichment	FALSE	VAHTS	VAHTS_Universal_V6_RNA-seq_Library_Prep_Kit_for_Illumina	150	22	NovaSeq 6000	A00511	HJCLHDSX3	HJCLHDSX3_lane02	62321444	549	D5
lab13_202214	1000	PolyA(+)_enrichment	FALSE	VAHTS	VAHTS_Universal_V6_RNA-seq_Library_Prep_Kit_for_Illumina	150	17.4	NovaSeq 6000	A00511	HJCLHDSX3	HJCLHDSX3_lane02	67073955	538	D5
lab13_202215	1000	PolyA(+)_enrichment	FALSE	VAHTS	VAHTS_Universal_V6_RNA-seq_Library_Prep_Kit_for_Illumina	150	19.8	NovaSeq 6000	A00511	HJCLHDSX3	HJCLHDSX3_lane02	69859920	563	D5
lab13_202216	1000	PolyA(+)_enrichment	FALSE	VAHTS	VAHTS_Universal_V6_RNA-seq_Library_Prep_Kit_for_Illumina	150	29.8	NovaSeq 6000	A00511	HJCLHDSX3	HJCLHDSX3_lane02	70775579	515	T1
lab13_202217	1000	PolyA(+)_enrichment	FALSE	VAHTS	VAHTS_Universal_V6_RNA-seq_Library_Prep_Kit_for_Illumina	150	18.9	NovaSeq 6000	A00511	HJCLHDSX3	HJCLHDSX3_lane02	63926349	493	T1
lab13_202218	1000	PolyA(+)_enrichment	FALSE	VAHTS	VAHTS_Universal_V6_RNA-seq_Library_Prep_Kit_for_Illumina	150	16.3	NovaSeq 6000	A00511	HJCLHDSX3	HJCLHDSX3_lane02	61741768	484	T1
lab13_202219	1000	PolyA(+)_enrichment	FALSE	VAHTS	VAHTS_Universal_V6_RNA-seq_Library_Prep_Kit_for_Illumina	150	18.7	NovaSeq 6000	A00511	HJCLHDSX3	HJCLHDSX3_lane02	64084893	494	T2
lab13_202220	1000	PolyA(+)_enrichment	FALSE	VAHTS	VAHTS_Universal_V6_RNA-seq_Library_Prep_Kit_for_Illumina	150	24.2	NovaSeq 6000	A00511	HJCLHDSX3	HJCLHDSX3_lane02	66524036	522	T2
lab13_202221	1000	PolyA(+)_enrichment	FALSE	VAHTS	VAHTS_Universal_V6_RNA-seq_Library_Prep_Kit_for_Illumina	150	26	NovaSeq 6000	A00511	HJCLHDSX3	HJCLHDSX3_lane02	61466743	503	T2
lab13_202222	1000	PolyA(+)_enrichment	FALSE	VAHTS	VAHTS_Universal_V6_RNA-seq_Library_Prep_Kit_for_Illumina	150	22.2	NovaSeq 6000	A00511	HJCLHDSX3	HJCLHDSX3_lane02	63992068	508	D6
lab13_202223	1000	PolyA(+)_enrichment	FALSE	VAHTS	VAHTS_Universal_V6_RNA-seq_Library_Prep_Kit_for_Illumina	150	21.6	NovaSeq 6000	A00511	HJCLHDSX3	HJCLHDSX3_lane02	66372687	518	D6
lab13_202224	1000	PolyA(+)_enrichment	FALSE	VAHTS	VAHTS_Universal_V6_RNA-seq_Library_Prep_Kit_for_Illumina	150	23.6	NovaSeq 6000	A00511	HJCLHDSX3	HJCLHDSX3_lane02	58187540	510	D6
lab16_202207	1000	PolyA(+)_enrichment	FALSE	Roche	KAPA_RNA_HyperPrep_Kit	150	85.07	NovaSeq 6000		HKMGKDRXY	HKMGKDRXY_lane01	91548457	1258	M8
lab16_202208	1000	PolyA(+)_enrichment	FALSE	Roche	KAPA_RNA_HyperPrep_Kit	150	118.53	NovaSeq 6000		HKMGKDRXY	HKMGKDRXY_lane01	96535897	1246	M8
lab16_202209	1000	PolyA(+)_enrichment	FALSE	Roche	KAPA_RNA_HyperPrep_Kit	150	63.43	NovaSeq 6000		HKMGKDRXY	HKMGKDRXY_lane01	115067941	1216	M8
lab16_202210	1000	PolyA(+)_enrichment	FALSE	Roche	KAPA_RNA_HyperPrep_Kit	150	78.6	NovaSeq 6000		HKMGKDRXY	HKMGKDRXY_lane01	102277318	1206	F7
lab16_202211	1000	PolyA(+)_enrichment	FALSE	Roche	KAPA_RNA_HyperPrep_Kit	150	157.66	NovaSeq 6000		HKMGKDRXY	HKMGKDRXY_lane01	91619872	1519	F7
lab16_202212	1000	PolyA(+)_enrichment	FALSE	Roche	KAPA_RNA_HyperPrep_Kit	150	66.4	NovaSeq 6000		HKMGKDRXY	HKMGKDRXY_lane01	89381930	1417	F7
lab16_202213	1000	PolyA(+)_enrichment	FALSE	Roche	KAPA_RNA_HyperPrep_Kit	150	96.5	NovaSeq 6000		HKMGKDRXY	HKMGKDRXY_lane01	86074542	1433	D5
lab16_202214	1000	PolyA(+)_enrichment	FALSE	Roche	KAPA_RNA_HyperPrep_Kit	150	90.07	NovaSeq 6000		HKMGKDRXY	HKMGKDRXY_lane01	87712169	1393	D5
lab16_202215	1000	PolyA(+)_enrichment	FALSE	Roche	KAPA_RNA_HyperPrep_Kit	150	81.5	NovaSeq 6000		HKMGKDRXY	HKMGKDRXY_lane01	76230662	1460	D5
lab16_202216	1000	PolyA(+)_enrichment	FALSE	Roche	KAPA_RNA_HyperPrep_Kit	150	71.68	NovaSeq 6000		HKMGKDRXY	HKMGKDRXY_lane01	97834709	1273	T1
lab16_202217	1000	PolyA(+)_enrichment	FALSE	Roche	KAPA_RNA_HyperPrep_Kit	150	78.34	NovaSeq 6000		HKMGKDRXY	HKMGKDRXY_lane01	94349648	1257	T1
lab16_202218	1000	PolyA(+)_enrichment	FALSE	Roche	KAPA_RNA_HyperPrep_Kit	150	122.25	NovaSeq 6000		HKMGKDRXY	HKMGKDRXY_lane01	99366513	1274	T1
lab16_202219	1000	PolyA(+)_enrichment	FALSE	Roche	KAPA_RNA_HyperPrep_Kit	150	66.21	NovaSeq 6000		HKMGKDRXY	HKMGKDRXY_lane01	86831982	1365	T2
lab16_202220	1000	PolyA(+)_enrichment	FALSE	Roche	KAPA_RNA_HyperPrep_Kit	150	108.78	NovaSeq 6000		HKMGKDRXY	HKMGKDRXY_lane01	59537567	1286	T2
lab16_202221	1000	PolyA(+)_enrichment	FALSE	Roche	KAPA_RNA_HyperPrep_Kit	150	81.88	NovaSeq 6000		HKMGKDRXY	HKMGKDRXY_lane01	56745756	1340	T2
lab16_202222	1000	PolyA(+)_enrichment	FALSE	Roche	KAPA_RNA_HyperPrep_Kit	150	54.59	NovaSeq 6000		HKMGKDRXY	HKMGKDRXY_lane01	59621365	1410	D6
lab16_202223	1000	PolyA(+)_enrichment	FALSE	Roche	KAPA_RNA_HyperPrep_Kit	150	81.93	NovaSeq 6000		HKMGKDRXY	HKMGKDRXY_lane01	59828020	1377	D6
lab16_202224	1000	PolyA(+)_enrichment	FALSE	Roche	KAPA_RNA_HyperPrep_Kit	150	108	NovaSeq 6000		HKMGKDRXY	HKMGKDRXY_lane01	58097909	1260	D6
lab17_202207	1000	rRNA_depletion	FALSE	VAHTS	VAHTS_Universal_V8_RNA-seq_Library_Prep_Kit_for_Illumina	150	60	NextSeq CN500	TPNB500305	HCVWVAFXY	HCVWVAFXY_lane01	26439844	172	M8
lab17_202208	1000	rRNA_depletion	FALSE	VAHTS	VAHTS_Universal_V8_RNA-seq_Library_Prep_Kit_for_Illumina	150	51.8	NextSeq CN500	TPNB500305	HCVWVAFXY	HCVWVAFXY_lane01	26299114	174	M8
lab17_202209	1000	rRNA_depletion	FALSE	VAHTS	VAHTS_Universal_V8_RNA-seq_Library_Prep_Kit_for_Illumina	150	52	NextSeq CN500	TPNB500305	H2TJMAFXY	H2TJMAFXY_lane01	27516234	164	M8
lab17_202210	1000	rRNA_depletion	FALSE	VAHTS	VAHTS_Universal_V8_RNA-seq_Library_Prep_Kit_for_Illumina	150	49.4	NextSeq CN500	TPNB500305	H2TJMAFXY	H2TJMAFXY_lane01	31481090	168	F7
lab17_202211	1000	rRNA_depletion	FALSE	VAHTS	VAHTS_Universal_V8_RNA-seq_Library_Prep_Kit_for_Illumina	150	48	NextSeq CN500	TPNB500305	H2TJMAFXY	H2TJMAFXY_lane01	25474714	174	F7
lab17_202212	1000	rRNA_depletion	FALSE	VAHTS	VAHTS_Universal_V8_RNA-seq_Library_Prep_Kit_for_Illumina	150	51.6	NextSeq CN500	TPNB500305	H2TJMAFXY	H2TJMAFXY_lane01	26464222	168	F7
lab17_202213	1000	rRNA_depletion	FALSE	VAHTS	VAHTS_Universal_V8_RNA-seq_Library_Prep_Kit_for_Illumina	150	65.4	NextSeq CN500	TPNB500305	H2TJMAFXY	H2TJMAFXY_lane01	27835090	179	D5
lab17_202214	1000	rRNA_depletion	FALSE	VAHTS	VAHTS_Universal_V8_RNA-seq_Library_Prep_Kit_for_Illumina	150	59.2	NextSeq CN500	TPNB500305	H2TJMAFXY	H2TJMAFXY_lane01	28104654	176	D5
lab17_202215	1000	rRNA_depletion	FALSE	VAHTS	VAHTS_Universal_V8_RNA-seq_Library_Prep_Kit_for_Illumina	150	78.6	NextSeq CN500	TPNB500305	H2TJMAFXY	H2TJMAFXY_lane01	27774238	173	D5
lab17_202216	1000	rRNA_depletion	FALSE	VAHTS	VAHTS_Universal_V8_RNA-seq_Library_Prep_Kit_for_Illumina	150	71.4	NextSeq CN500	TPNB500305	H2TJMAFXY	H2TJMAFXY_lane01	25045962	171	T1
lab17_202217	1000	rRNA_depletion	FALSE	VAHTS	VAHTS_Universal_V8_RNA-seq_Library_Prep_Kit_for_Illumina	150	70.6	NextSeq CN500	TPNB500305	HFYMJAFXY	H2TJMAFXY_lane01	26381858	177	T1
lab17_202218	1000	rRNA_depletion	FALSE	VAHTS	VAHTS_Universal_V8_RNA-seq_Library_Prep_Kit_for_Illumina	150	70	NextSeq CN500	TPNB500305	H2TJMAFXY	H2TJMAFXY_lane01	26426032	183	T1
lab17_202219	1000	rRNA_depletion	FALSE	VAHTS	VAHTS_Universal_V8_RNA-seq_Library_Prep_Kit_for_Illumina	150	63.8	NextSeq CN500	TPNB500305	H2TJMAFXY	H2TJMAFXY_lane01	27498682	174	T2
lab17_202220	1000	rRNA_depletion	FALSE	VAHTS	VAHTS_Universal_V8_RNA-seq_Library_Prep_Kit_for_Illumina	150	61.2	NextSeq CN500	TPNB500305	H2TJMAFXY	H2TJMAFXY_lane01	29427572	175	T2
lab17_202221	1000	rRNA_depletion	FALSE	VAHTS	VAHTS_Universal_V8_RNA-seq_Library_Prep_Kit_for_Illumina	150	65.6	NextSeq CN500	TPNB500305	H2TJMAFXY	H2TJMAFXY_lane01	28088526	173	T2
lab17_202222	1000	rRNA_depletion	FALSE	VAHTS	VAHTS_Universal_V8_RNA-seq_Library_Prep_Kit_for_Illumina	150	51	NextSeq CN500	TPNB500305	H2TJMAFXY	H2TJMAFXY_lane01	26222006	166	D6
lab17_202223	1000	rRNA_depletion	FALSE	VAHTS	VAHTS_Universal_V8_RNA-seq_Library_Prep_Kit_for_Illumina	150	76	NextSeq CN500	TPNB500305	H2TJMAFXY	H2TJMAFXY_lane01	26169860	183	D6
lab17_202224	1000	rRNA_depletion	FALSE	VAHTS	VAHTS_Universal_V8_RNA-seq_Library_Prep_Kit_for_Illumina	150	72.4	NextSeq CN500	TPNB500305	H2TJMAFXY	H2TJMAFXY_lane01	26034100	178	D6
lab21_202207	1000	PolyA(+)_enrichment	FALSE	VAHTS	VAHTS_Universal_V8_RNA-seq_Library_Prep_Kit_for_Illumina	150		NovaSeq 6000	A00301	HLFH5DSX3	HLFH5DSX3_lane03	33501647	417	M8
lab21_202208	1000	PolyA(+)_enrichment	FALSE	VAHTS	VAHTS_Universal_V8_RNA-seq_Library_Prep_Kit_for_Illumina	150		NovaSeq 6000	A00301	HLFH5DSX3	HLFH5DSX3_lane03	35709964	409	M8
lab21_202209	1000	PolyA(+)_enrichment	FALSE	VAHTS	VAHTS_Universal_V8_RNA-seq_Library_Prep_Kit_for_Illumina	150		NovaSeq 6000	A00301	HLFH5DSX3	HLFH5DSX3_lane03	33996413	417	M8
lab21_202210	1000	PolyA(+)_enrichment	FALSE	VAHTS	VAHTS_Universal_V8_RNA-seq_Library_Prep_Kit_for_Illumina	150		NovaSeq 6000	A00301	HLFH5DSX3	HLFH5DSX3_lane03	34543010	428	F7
lab21_202211	1000	PolyA(+)_enrichment	FALSE	VAHTS	VAHTS_Universal_V8_RNA-seq_Library_Prep_Kit_for_Illumina	150		NovaSeq 6000	A00301	HLFH5DSX3	HLFH5DSX3_lane03	35657524	430	F7
lab21_202212	1000	PolyA(+)_enrichment	FALSE	VAHTS	VAHTS_Universal_V8_RNA-seq_Library_Prep_Kit_for_Illumina	150		NovaSeq 6000	A00301	HLFH5DSX3	HLFH5DSX3_lane03	41114505	425	F7
lab21_202213	1000	PolyA(+)_enrichment	FALSE	VAHTS	VAHTS_Universal_V8_RNA-seq_Library_Prep_Kit_for_Illumina	150		NovaSeq 6000	A00301	HLFH5DSX3	HLFH5DSX3_lane03	34413165	448	D5
lab21_202214	1000	PolyA(+)_enrichment	FALSE	VAHTS	VAHTS_Universal_V8_RNA-seq_Library_Prep_Kit_for_Illumina	150		NovaSeq 6000	A00301	HLFH5DSX3	HLFH5DSX3_lane03	39172422	449	D5
lab21_202215	1000	PolyA(+)_enrichment	FALSE	VAHTS	VAHTS_Universal_V8_RNA-seq_Library_Prep_Kit_for_Illumina	150		NovaSeq 6000	A00301	HLFH5DSX3	HLFH5DSX3_lane03	38607135	448	D5
lab21_202216	1000	PolyA(+)_enrichment	FALSE	VAHTS	VAHTS_Universal_V8_RNA-seq_Library_Prep_Kit_for_Illumina	150		NovaSeq 6000	A00301	HLFH5DSX3	HLFH5DSX3_lane03	40362437	398	T1
lab21_202217	1000	PolyA(+)_enrichment	FALSE	VAHTS	VAHTS_Universal_V8_RNA-seq_Library_Prep_Kit_for_Illumina	150		NovaSeq 6000	A00301	HLFH5DSX3	HLFH5DSX3_lane03	34519279	413	T1
lab21_202218	1000	PolyA(+)_enrichment	FALSE	VAHTS	VAHTS_Universal_V8_RNA-seq_Library_Prep_Kit_for_Illumina	150		NovaSeq 6000	A00301	HLFH5DSX3	HLFH5DSX3_lane03	36496815	416	T1
lab21_202219	1000	PolyA(+)_enrichment	FALSE	VAHTS	VAHTS_Universal_V8_RNA-seq_Library_Prep_Kit_for_Illumina	150		NovaSeq 6000	A00301	HLFH5DSX3	HLFH5DSX3_lane03	36330721	421	T2
lab21_202220	1000	PolyA(+)_enrichment	FALSE	VAHTS	VAHTS_Universal_V8_RNA-seq_Library_Prep_Kit_for_Illumina	150		NovaSeq 6000	A00301	HLFH5DSX3	HLFH5DSX3_lane03	35854565	421	T2
lab21_202221	1000	PolyA(+)_enrichment	FALSE	VAHTS	VAHTS_Universal_V8_RNA-seq_Library_Prep_Kit_for_Illumina	150		NovaSeq 6000	A00301	HLFH5DSX3	HLFH5DSX3_lane03	38169919	420	T2
lab21_202222	1000	PolyA(+)_enrichment	FALSE	VAHTS	VAHTS_Universal_V8_RNA-seq_Library_Prep_Kit_for_Illumina	150		NovaSeq 6000	A00301	HLFH5DSX3	HLFH5DSX3_lane03	36297901	427	D6
lab21_202223	1000	PolyA(+)_enrichment	FALSE	VAHTS	VAHTS_Universal_V8_RNA-seq_Library_Prep_Kit_for_Illumina	150		NovaSeq 6000	A00301	HLFH5DSX3	HLFH5DSX3_lane03	37557280	424	D6
lab21_202224	1000	PolyA(+)_enrichment	FALSE	VAHTS	VAHTS_Universal_V8_RNA-seq_Library_Prep_Kit_for_Illumina	150		NovaSeq 6000	A00301	HLFH5DSX3	HLFH5DSX3_lane03	36692637	417	D6
lab22_202207	200	PolyA(+)_enrichment	TRUE	Yeasen	Hieff_NGS_Ultima_Dual_mode_mRNA_Library_PrepKit_for_MGI	100	27.21	MGISEQ-2000		V350100971&V350094460	V350100971_lane01, V350100971_lane02, V350094460_lane04	50947190	354	M8
lab22_202208	200	PolyA(+)_enrichment	TRUE	Yeasen	Hieff_NGS_Ultima_Dual_mode_mRNA_Library_PrepKit_for_MGI	100	27.68	MGISEQ-2000		V350100971&V350094460	V350100971_lane01, V350100971_lane02, V350094460_lane04	48036410	370	M8
lab22_202209	200	PolyA(+)_enrichment	TRUE	Yeasen	Hieff_NGS_Ultima_Dual_mode_mRNA_Library_PrepKit_for_MGI	100	25.35	MGISEQ-2000		V350100971&V350094460	V350100971_lane01, V350100971_lane02, V350094460_lane04	183181808	368	M8
lab22_202210	200	PolyA(+)_enrichment	TRUE	Yeasen	Hieff_NGS_Ultima_Dual_mode_mRNA_Library_PrepKit_for_MGI	100	19.09	MGISEQ-2000		V350100971&V350094460	V350100971_lane01, V350100971_lane02, V350094460_lane04	72904860	362	F7
lab22_202211	200	PolyA(+)_enrichment	TRUE	Yeasen	Hieff_NGS_Ultima_Dual_mode_mRNA_Library_PrepKit_for_MGI	100	23.92	MGISEQ-2000		V350100971&V350094460	V350100971_lane01, V350100971_lane02, V350094460_lane04	59950514	365	F7
lab22_202212	200	PolyA(+)_enrichment	TRUE	Yeasen	Hieff_NGS_Ultima_Dual_mode_mRNA_Library_PrepKit_for_MGI	100	25.61	MGISEQ-2000		V350100971&V350094460	V350100971_lane01, V350100971_lane02, V350094460_lane04	53429444	368	F7
lab22_202213	200	PolyA(+)_enrichment	TRUE	Yeasen	Hieff_NGS_Ultima_Dual_mode_mRNA_Library_PrepKit_for_MGI	100	22.77	MGISEQ-2000		V350100971&V350094460	V350100971_lane01, V350100971_lane02, V350094460_lane04	61248544	372	D5
lab22_202214	200	PolyA(+)_enrichment	TRUE	Yeasen	Hieff_NGS_Ultima_Dual_mode_mRNA_Library_PrepKit_for_MGI	100	25.39	MGISEQ-2000		V350100971&V350094460	V350100971_lane01, V350100971_lane02, V350094460_lane04	58031816	376	D5
lab22_202215	200	PolyA(+)_enrichment	TRUE	Yeasen	Hieff_NGS_Ultima_Dual_mode_mRNA_Library_PrepKit_for_MGI	100	23.88	MGISEQ-2000		V350100971&V350094460	V350100971_lane01, V350100971_lane02, V350094460_lane04	62238574	403	D5
lab22_202216	200	PolyA(+)_enrichment	TRUE	Yeasen	Hieff_NGS_Ultima_Dual_mode_mRNA_Library_PrepKit_for_MGI	100	28.42	MGISEQ-2000		V350100971&V350094460	V350100971_lane01, V350100971_lane02, V350094460_lane04	47068580	354	T1
lab22_202217	200	PolyA(+)_enrichment	TRUE	Yeasen	Hieff_NGS_Ultima_Dual_mode_mRNA_Library_PrepKit_for_MGI	100	29.25	MGISEQ-2000		V350100971&V350094460	V350100971_lane01, V350100971_lane02, V350094460_lane04	48538716	363	T1
lab22_202218	200	PolyA(+)_enrichment	TRUE	Yeasen	Hieff_NGS_Ultima_Dual_mode_mRNA_Library_PrepKit_for_MGI	100	23.03	MGISEQ-2000		V350100971&V350094460	V350100971_lane01, V350100971_lane02, V350094460_lane04	57772658	373	T1
lab22_202219	200	PolyA(+)_enrichment	TRUE	Yeasen	Hieff_NGS_Ultima_Dual_mode_mRNA_Library_PrepKit_for_MGI	100	23.43	MGISEQ-2000		V350100971&V350094460	V350100971_lane01, V350100971_lane02, V350094460_lane04	58591474	375	T2
lab22_202220	200	PolyA(+)_enrichment	TRUE	Yeasen	Hieff_NGS_Ultima_Dual_mode_mRNA_Library_PrepKit_for_MGI	100	22.6	MGISEQ-2000		V350100971	V350100971_lane3, 04	67771776	360	T2
lab22_202221	200	PolyA(+)_enrichment	TRUE	Yeasen	Hieff_NGS_Ultima_Dual_mode_mRNA_Library_PrepKit_for_MGI	100	24.61	MGISEQ-2000		V350100971	V350100971_lane3, 04	62288466	383	T2
lab22_202222	200	PolyA(+)_enrichment	TRUE	Yeasen	Hieff_NGS_Ultima_Dual_mode_mRNA_Library_PrepKit_for_MGI	100	21.53	MGISEQ-2000		V350100971	V350100971_lane3, 04	71551260	321	D6
lab22_202223	200	PolyA(+)_enrichment	TRUE	Yeasen	Hieff_NGS_Ultima_Dual_mode_mRNA_Library_PrepKit_for_MGI	100	23	MGISEQ-2000		V350100971	V350100971_lane3, 04	52744660	380	D6
lab22_202224	200	PolyA(+)_enrichment	TRUE	Yeasen	Hieff_NGS_Ultima_Dual_mode_mRNA_Library_PrepKit_for_MGI	100	29.08	MGISEQ-2000		V350100971	V350100971_lane3, 04	52267986	375	D6
lab23_202207	10	rRNA_depletion	TRUE	takara	SMARTer_Stranded_Total_RNA-Seq_Kit_v2	100	20.2	DNBSEQ-T7		E100052665	E100052665_lane01	57842876	216	M8
lab23_202208	10	rRNA_depletion	TRUE	takara	SMARTer_Stranded_Total_RNA-Seq_Kit_v2	100	18.5	DNBSEQ-T7		E100052665	E100052665_lane01	54191120	219	M8
lab23_202209	10	rRNA_depletion	TRUE	takara	SMARTer_Stranded_Total_RNA-Seq_Kit_v2	100	22.2	DNBSEQ-T7		E100052665	E100052665_lane01	58747448	218	M8
lab23_202210	10	rRNA_depletion	TRUE	takara	SMARTer_Stranded_Total_RNA-Seq_Kit_v2	100	22.6	DNBSEQ-T7		E100052665	E100052665_lane01	54558082	220	F7
lab23_202211	10	rRNA_depletion	TRUE	takara	SMARTer_Stranded_Total_RNA-Seq_Kit_v2	100	21.4	DNBSEQ-T7		E100052665	E100052665_lane01	55281130	222	F7
lab23_202212	10	rRNA_depletion	TRUE	takara	SMARTer_Stranded_Total_RNA-Seq_Kit_v2	100	22	DNBSEQ-T7		E100052665	E100052665_lane01	53291356	223	F7
lab23_202213	10	rRNA_depletion	TRUE	takara	SMARTer_Stranded_Total_RNA-Seq_Kit_v2	100	19.9	DNBSEQ-T7		E100052665	E100052665_lane01	64932576	224	D5
lab23_202214	10	rRNA_depletion	TRUE	takara	SMARTer_Stranded_Total_RNA-Seq_Kit_v2	100	22.2	DNBSEQ-T7		E100052665	E100052665_lane01	66741606	225	D5
lab23_202215	10	rRNA_depletion	TRUE	takara	SMARTer_Stranded_Total_RNA-Seq_Kit_v2	100	19.8	DNBSEQ-T7		E100052665	E100052665_lane01	65375958	224	D5
lab23_202216	10	rRNA_depletion	TRUE	takara	SMARTer_Stranded_Total_RNA-Seq_Kit_v2	100	22	DNBSEQ-T7		E100052665	E100052665_lane01	57420312	224	T1
lab23_202217	10	rRNA_depletion	TRUE	takara	SMARTer_Stranded_Total_RNA-Seq_Kit_v2	100	22	DNBSEQ-T7		E100052665	E100052665_lane01	59757978	220	T1
lab23_202218	10	rRNA_depletion	TRUE	takara	SMARTer_Stranded_Total_RNA-Seq_Kit_v2	100	20.2	DNBSEQ-T7		E100052665	E100052665_lane01	58194538	226	T1
lab23_202219	10	rRNA_depletion	TRUE	takara	SMARTer_Stranded_Total_RNA-Seq_Kit_v2	100	23.8	DNBSEQ-T7		E100052665	E100052665_lane01	58619962	218	T2
lab23_202220	10	rRNA_depletion	TRUE	takara	SMARTer_Stranded_Total_RNA-Seq_Kit_v2	100	18.5	DNBSEQ-T7		E100052665	E100052665_lane01	66494888	214	T2
lab23_202221	10	rRNA_depletion	TRUE	takara	SMARTer_Stranded_Total_RNA-Seq_Kit_v2	100	19.6	DNBSEQ-T7		E100052665	E100052665_lane01	64694864	217	T2
lab23_202222	10	rRNA_depletion	TRUE	takara	SMARTer_Stranded_Total_RNA-Seq_Kit_v2	100	21.6	DNBSEQ-T7		E100052665	E100052665_lane01	60295876	216	D6
lab23_202223	10	rRNA_depletion	TRUE	takara	SMARTer_Stranded_Total_RNA-Seq_Kit_v2	100	21.2	DNBSEQ-T7		E100052665	E100052665_lane01	65717632	220	D6
lab23_202224	10	rRNA_depletion	TRUE	takara	SMARTer_Stranded_Total_RNA-Seq_Kit_v2	100	23.2	DNBSEQ-T7		E100052665	E100052665_lane01	56571906	218	D6
lab24_202207	1000	rRNA_depletion	TRUE	Roche	KAPA_Stranded_mRNA-Seq_Library_Preparation_Kit	150	113.66	NovaSeq 6000	A00793	HCJL5DMXY	HCJL5DMXY_lane01	28500790	164	M8
lab24_202208	1000	rRNA_depletion	TRUE	Roche	KAPA_Stranded_mRNA-Seq_Library_Preparation_Kit	150	110.75	NovaSeq 6000	A00793	HCJL5DMXY	HCJL5DMXY_lane01	31081880	165	M8
lab24_202209	1000	rRNA_depletion	TRUE	Roche	KAPA_Stranded_mRNA-Seq_Library_Preparation_Kit	150	104.27	NovaSeq 6000	A00793	HCJL5DMXY	HCJL5DMXY_lane01	32913480	163	M8
lab24_202210	1000	rRNA_depletion	TRUE	Roche	KAPA_Stranded_mRNA-Seq_Library_Preparation_Kit	150	90.98	NovaSeq 6000	A00793	HCJL5DMXY	HCJL5DMXY_lane01	25711280	161	F7
lab24_202211	1000	rRNA_depletion	TRUE	Roche	KAPA_Stranded_mRNA-Seq_Library_Preparation_Kit	150	93.75	NovaSeq 6000	A00793	HCJL5DMXY	HCJL5DMXY_lane01	23856274	164	F7
lab24_202212	1000	rRNA_depletion	TRUE	Roche	KAPA_Stranded_mRNA-Seq_Library_Preparation_Kit	150	106.5	NovaSeq 6000	A00793	HCJL5DMXY	HCJL5DMXY_lane01	28243299	162	F7
lab24_202213	1000	rRNA_depletion	TRUE	Roche	KAPA_Stranded_mRNA-Seq_Library_Preparation_Kit	150	91.94	NovaSeq 6000	A00793	HCJL5DMXY	HCJL5DMXY_lane01	25940674	162	D5
lab24_202214	1000	rRNA_depletion	TRUE	Roche	KAPA_Stranded_mRNA-Seq_Library_Preparation_Kit	150	92.79	NovaSeq 6000	A00793	HCJL5DMXY	HCJL5DMXY_lane01	25307708	163	D5
lab24_202215	1000	rRNA_depletion	TRUE	Roche	KAPA_Stranded_mRNA-Seq_Library_Preparation_Kit	150	101.1	NovaSeq 6000	A00793	HCJL5DMXY	HCJL5DMXY_lane01	26618363	163	D5
lab24_202216	1000	rRNA_depletion	TRUE	Roche	KAPA_Stranded_mRNA-Seq_Library_Preparation_Kit	150	119.73	NovaSeq 6000	A00793	HCJL5DMXY	HCJL5DMXY_lane01	29664391	160	T1
lab24_202217	1000	rRNA_depletion	TRUE	Roche	KAPA_Stranded_mRNA-Seq_Library_Preparation_Kit	150	112.39	NovaSeq 6000	A00793	HCJL5DMXY	HCJL5DMXY_lane01	28765107	161	T1
lab24_202218	1000	rRNA_depletion	TRUE	Roche	KAPA_Stranded_mRNA-Seq_Library_Preparation_Kit	150	119.53	NovaSeq 6000	A00793	HCJL5DMXY	HCJL5DMXY_lane01	32895623	161	T1
lab24_202219	1000	rRNA_depletion	TRUE	Roche	KAPA_Stranded_mRNA-Seq_Library_Preparation_Kit	150	100.36	NovaSeq 6000	A00793	HCJL5DMXY	HCJL5DMXY_lane01	28810376	164	T2
lab24_202220	1000	rRNA_depletion	TRUE	Roche	KAPA_Stranded_mRNA-Seq_Library_Preparation_Kit	150	101.8	NovaSeq 6000	A00793	HCJL5DMXY	HCJL5DMXY_lane01	30010010	164	T2
lab24_202221	1000	rRNA_depletion	TRUE	Roche	KAPA_Stranded_mRNA-Seq_Library_Preparation_Kit	150	111.69	NovaSeq 6000	A00793	HCJL5DMXY	HCJL5DMXY_lane01	29244142	162	T2
lab24_202222	1000	rRNA_depletion	TRUE	Roche	KAPA_Stranded_mRNA-Seq_Library_Preparation_Kit	150	113.01	NovaSeq 6000	A00793	HCJL5DMXY	HCJL5DMXY_lane01	28769313	162	D6
lab24_202223	1000	rRNA_depletion	TRUE	Roche	KAPA_Stranded_mRNA-Seq_Library_Preparation_Kit	150	114.18	NovaSeq 6000	A00793	HCJL5DMXY	HCJL5DMXY_lane01	31574815	163	D6
lab24_202224	1000	rRNA_depletion	TRUE	Roche	KAPA_Stranded_mRNA-Seq_Library_Preparation_Kit	150	114.63	NovaSeq 6000	A00793	HCJL5DMXY	HCJL5DMXY_lane01	27199062	164	D6
lab29_202207	1000	rRNA_depletion	TRUE	Roche	KAPA_Stranded_RNA-Seq_Kit	100	40	MGISEQ-2000		V350098938;V350099195;F350001519;V350099207	V350098938(lane4);V350099195(lane4);F350001519(lane1,2);V350099207(lane1,2,3,4)	139413806	162	M8
lab29_202208	1000	rRNA_depletion	TRUE	Roche	KAPA_Stranded_RNA-Seq_Kit	100	27.2	MGISEQ-2000		V350098938;V350099195;F350001519;V350099207	V350098938(lane4);V350099195(lane4);F350001519(lane1,2);V350099207(lane1,2,3,4)	133169440	157	M8
lab29_202209	1000	rRNA_depletion	TRUE	Roche	KAPA_Stranded_RNA-Seq_Kit	100	44	MGISEQ-2000		V350098938;V350099195;F350001519;V350099207	V350098938(lane4);V350099195(lane4);F350001519(lane1,2);V350099207(lane1,2,3,4)	125929062	161	M8
lab29_202210	1000	rRNA_depletion	TRUE	Roche	KAPA_Stranded_RNA-Seq_Kit	100	33.6	MGISEQ-2000		V350098938;V350099195;F350001519;V350099207	V350098938(lane4);V350099195(lane4);F350001519(lane1,2);V350099207(lane1,2,3,4)	138932608	154	F7
lab29_202211	1000	rRNA_depletion	TRUE	Roche	KAPA_Stranded_RNA-Seq_Kit	100	29.8	MGISEQ-2000		V350098938;V350099195;F350001519;V350099207	V350098938(lane4);V350099195(lane4);F350001519(lane1,2);V350099207(lane1,2,3,4)	120544200	159	F7
lab29_202212	1000	rRNA_depletion	TRUE	Roche	KAPA_Stranded_RNA-Seq_Kit	100	24.6	MGISEQ-2000		V350098938;V350099195;F350001519;V350099207	V350098938(lane4);V350099195(lane4);F350001519(lane1,2);V350099207(lane1,2,3,4)	110208054	157	F7
lab29_202213	1000	rRNA_depletion	TRUE	Roche	KAPA_Stranded_RNA-Seq_Kit	100	30.4	MGISEQ-2000		F350001522;F350003037;V350099360	F350001522(lane1,2);F350003037(lane1,2);V350099360(lane1,2,3,4)	143743868	169	D5
lab29_202214	1000	rRNA_depletion	TRUE	Roche	KAPA_Stranded_RNA-Seq_Kit	100	28	MGISEQ-2000		F350001522;F350003037;V350099360	F350001522(lane1,2);F350003037(lane1,2);V350099360(lane1,2,3,4)	148036010	170	D5
lab29_202215	1000	rRNA_depletion	TRUE	Roche	KAPA_Stranded_RNA-Seq_Kit	100	25	MGISEQ-2000		F350001522;F350003037;V350099360	F350001522(lane1,2);F350003037(lane1,2);V350099360(lane1,2,3,4)	137613890	170	D5
lab29_202216	1000	rRNA_depletion	TRUE	Roche	KAPA_Stranded_RNA-Seq_Kit	100	32.8	MGISEQ-2000		F350001522;F350003037;V350099360	F350001522(lane1,2);F350003037(lane1,2);V350099360(lane1,2,3,4)	117969744	169	T1
lab29_202217	1000	rRNA_depletion	TRUE	Roche	KAPA_Stranded_RNA-Seq_Kit	100	27.4	MGISEQ-2000		F350001522;F350003037;V350099360	F350001522(lane1,2);F350003037(lane1,2);V350099360(lane1,2,3,4)	124269862	171	T1
lab29_202218	1000	rRNA_depletion	TRUE	Roche	KAPA_Stranded_RNA-Seq_Kit	100	28.4	MGISEQ-2000		F350001522;F350003037;V350099360	F350001522(lane1,2);F350003037(lane1,2);V350099360(lane1,2,3,4)	119713100	167	T1
lab29_202219	1000	rRNA_depletion	TRUE	Roche	KAPA_Stranded_RNA-Seq_Kit	100	32.2	MGISEQ-2000		F350001522;F350003037;V350099360	F350001522(lane1,2);F350003037(lane1,2);V350099360(lane1,2,3,4)	106330444	214	T2
lab29_202220	1000	rRNA_depletion	TRUE	Roche	KAPA_Stranded_RNA-Seq_Kit	100	34.6	MGISEQ-2000		F350001522;F350003037;V350099360	F350001522(lane1,2);F350003037(lane1,2);V350099360(lane1,2,3,4)	122622916	168	T2
lab29_202221	1000	rRNA_depletion	TRUE	Roche	KAPA_Stranded_RNA-Seq_Kit	100	26.6	MGISEQ-2000		F350001522;F350003037;V350099360	F350001522(lane1,2);F350003037(lane1,2);V350099360(lane1,2,3,4)	99298898	167	T2
lab29_202222	1000	rRNA_depletion	TRUE	Roche	KAPA_Stranded_RNA-Seq_Kit	100	33	MGISEQ-2000		F350001522;F350003037;V350099360	F350001522(lane1,2);F350003037(lane1,2);V350099360(lane1,2,3,4)	159863694	169	D6
lab29_202223	1000	rRNA_depletion	TRUE	Roche	KAPA_Stranded_RNA-Seq_Kit	100	22.6	MGISEQ-2000		F350001522;F350003037;V350099360	F350001522(lane1,2);F350003037(lane1,2);V350099360(lane1,2,3,4)	117732376	166	D6
lab29_202224	1000	rRNA_depletion	TRUE	Roche	KAPA_Stranded_RNA-Seq_Kit	100	33.2	MGISEQ-2000		F350001522;F350003037;V350099360	F350001522(lane1,2);F350003037(lane1,2);V350099360(lane1,2,3,4)	120930586	164	D6
lab30_202207	100	rRNA_depletion	TRUE	VAHTS	VAHTS_Universal_V8_RNA-Seq_Library_Prep_Kit_for_Illumina	150	39.66	NovaSeq 6000	A00583	HKGFHDSX3	HKGFHDSX3_lane03	34398241	298	M8
lab30_202208	100	rRNA_depletion	TRUE	VAHTS	VAHTS_Universal_V8_RNA-Seq_Library_Prep_Kit_for_Illumina	150	49.36	NovaSeq 6000	A00583	HKGFHDSX3	HKGFHDSX3_lane03	30082727	300	M8
lab30_202209	100	rRNA_depletion	TRUE	VAHTS	VAHTS_Universal_V8_RNA-Seq_Library_Prep_Kit_for_Illumina	150	48.67	NovaSeq 6000	A00583	HKGFHDSX3	HKGFHDSX3_lane03	33705850	293	M8
lab30_202210	100	rRNA_depletion	TRUE	VAHTS	VAHTS_Universal_V8_RNA-Seq_Library_Prep_Kit_for_Illumina	150	50.04	NovaSeq 6000	A00583	HKGFHDSX3	HKGFHDSX3_lane03	37507150	294	F7
lab30_202211	100	rRNA_depletion	TRUE	VAHTS	VAHTS_Universal_V8_RNA-Seq_Library_Prep_Kit_for_Illumina	150	61.8	NovaSeq 6000	A00583	HKGFHDSX3	HKGFHDSX3_lane03	31367871	292	F7
lab30_202212	100	rRNA_depletion	TRUE	VAHTS	VAHTS_Universal_V8_RNA-Seq_Library_Prep_Kit_for_Illumina	150	52.39	NovaSeq 6000	A00583	HKGFHDSX3	HKGFHDSX3_lane03	35945900	288	F7
lab30_202213	100	rRNA_depletion	TRUE	VAHTS	VAHTS_Universal_V8_RNA-Seq_Library_Prep_Kit_for_Illumina	150	52.2	NovaSeq 6000	A00583	HKGFHDSX3	HKGFHDSX3_lane03	40547359	302	D5
lab30_202214	100	rRNA_depletion	TRUE	VAHTS	VAHTS_Universal_V8_RNA-Seq_Library_Prep_Kit_for_Illumina	150	56.02	NovaSeq 6000	A00583	HKGFHDSX3	HKGFHDSX3_lane03	33438880	302	D5
lab30_202215	100	rRNA_depletion	TRUE	VAHTS	VAHTS_Universal_V8_RNA-Seq_Library_Prep_Kit_for_Illumina	150	54.16	NovaSeq 6000	A00583	HKGFHDSX3	HKGFHDSX3_lane03	34869264	305	D5
lab30_202216	100	rRNA_depletion	TRUE	VAHTS	VAHTS_Universal_V8_RNA-Seq_Library_Prep_Kit_for_Illumina	150	51.12	NovaSeq 6000	A00583	HKGFHDSX3	HKGFHDSX3_lane03	31151592	304	T1
lab30_202217	100	rRNA_depletion	TRUE	VAHTS	VAHTS_Universal_V8_RNA-Seq_Library_Prep_Kit_for_Illumina	150	72.08	NovaSeq 6000	A00583	HKGFHDSX3	HKGFHDSX3_lane03	33364681	292	T1
lab30_202218	100	rRNA_depletion	TRUE	VAHTS	VAHTS_Universal_V8_RNA-Seq_Library_Prep_Kit_for_Illumina	150	66.99	NovaSeq 6000	A00583	HJF23DSX3	HJF23DSX3_lane01	33386773	292	T1
lab30_202219	100	rRNA_depletion	TRUE	VAHTS	VAHTS_Universal_V8_RNA-Seq_Library_Prep_Kit_for_Illumina	150	58.96	NovaSeq 6000	A00583	HJF23DSX3	HJF23DSX3_lane01	27078872	289	T2
lab30_202220	100	rRNA_depletion	TRUE	VAHTS	VAHTS_Universal_V8_RNA-Seq_Library_Prep_Kit_for_Illumina	150	64.74	NovaSeq 6000	A00583	HKGFHDSX3	HKGFHDSX3_lane03	32283449	295	T2
lab30_202221	100	rRNA_depletion	TRUE	VAHTS	VAHTS_Universal_V8_RNA-Seq_Library_Prep_Kit_for_Illumina	150	65.81	NovaSeq 6000	A00583	HJF23DSX3	HJF23DSX3_lane01	29403867	297	T2
lab30_202222	100	rRNA_depletion	TRUE	VAHTS	VAHTS_Universal_V8_RNA-Seq_Library_Prep_Kit_for_Illumina	150	64.54	NovaSeq 6000	A00583	HJF23DSX3	HJF23DSX3_lane01	29986642	304	D6
lab30_202223	100	rRNA_depletion	TRUE	VAHTS	VAHTS_Universal_V8_RNA-Seq_Library_Prep_Kit_for_Illumina	150	56.12	NovaSeq 6000	A00583	HJF23DSX3	HJF23DSX3_lane04	30037612	300	D6
lab30_202224	100	rRNA_depletion	TRUE	VAHTS	VAHTS_Universal_V8_RNA-Seq_Library_Prep_Kit_for_Illumina	150	56.31	NovaSeq 6000	A00583	HJF23DSX3	HJF23DSX3_lane02	27571561	299	D6
lab31_202207	200	PolyA(+)_enrichment	FALSE	Yeasen	Hieff_NGS_Ultima_Dual_mode_mRNA_Library_PrepKit_for_MGI	150	16.52	MGISEQ-2000RS		V350102815	V350102815_lane01_lane02	58994728	405	M8
lab31_202208	200	PolyA(+)_enrichment	FALSE	Yeasen	Hieff_NGS_Ultima_Dual_mode_mRNA_Library_PrepKit_for_MGI	150	16.55	MGISEQ-2000RS		V350102815	V350102815_lane01_lane02	59396410	413	M8
lab31_202209	200	PolyA(+)_enrichment	FALSE	Yeasen	Hieff_NGS_Ultima_Dual_mode_mRNA_Library_PrepKit_for_MGI	150	15.31	MGISEQ-2000RS		V350102815	V350102815_lane01_lane02	59276568	407	M8
lab31_202210	200	PolyA(+)_enrichment	FALSE	Yeasen	Hieff_NGS_Ultima_Dual_mode_mRNA_Library_PrepKit_for_MGI	150	16.17	MGISEQ-2000RS		V350102815	V350102815_lane01_lane02	56288696	426	F7
lab31_202211	200	PolyA(+)_enrichment	FALSE	Yeasen	Hieff_NGS_Ultima_Dual_mode_mRNA_Library_PrepKit_for_MGI	150	13.68	MGISEQ-2000RS		V350102815	V350102815_lane01_lane02	56135662	429	F7
lab31_202212	200	PolyA(+)_enrichment	FALSE	Yeasen	Hieff_NGS_Ultima_Dual_mode_mRNA_Library_PrepKit_for_MGI	150	16.21	MGISEQ-2000RS		V350102815	V350102815_lane01_lane02	56661656	440	F7
lab31_202213	200	PolyA(+)_enrichment	FALSE	Yeasen	Hieff_NGS_Ultima_Dual_mode_mRNA_Library_PrepKit_for_MGI	150	15.34	MGISEQ-2000RS		V350102815	V350102815_lane01_lane02	57891878	434	D5
lab31_202214	200	PolyA(+)_enrichment	FALSE	Yeasen	Hieff_NGS_Ultima_Dual_mode_mRNA_Library_PrepKit_for_MGI	150	16.53	MGISEQ-2000RS		V350102815	V350102815_lane01_lane02	59517198	418	D5
lab31_202215	200	PolyA(+)_enrichment	FALSE	Yeasen	Hieff_NGS_Ultima_Dual_mode_mRNA_Library_PrepKit_for_MGI	150	21.8	MGISEQ-2000RS		V350102815	V350102815_lane01_lane02	58236100	449	D5
lab31_202216	200	PolyA(+)_enrichment	FALSE	Yeasen	Hieff_NGS_Ultima_Dual_mode_mRNA_Library_PrepKit_for_MGI	150	18.83	MGISEQ-2000RS		V350102815	V350102815_lane01_lane02	57577602	415	T1
lab31_202217	200	PolyA(+)_enrichment	FALSE	Yeasen	Hieff_NGS_Ultima_Dual_mode_mRNA_Library_PrepKit_for_MGI	150	19.38	MGISEQ-2000RS		V350102815	V350102815_lane01_lane02	59432720	396	T1
lab31_202218	200	PolyA(+)_enrichment	FALSE	Yeasen	Hieff_NGS_Ultima_Dual_mode_mRNA_Library_PrepKit_for_MGI	150	19.01	MGISEQ-2000RS		V350102815	V350102815_lane01_lane02	56926942	436	T1
lab31_202219	200	PolyA(+)_enrichment	FALSE	Yeasen	Hieff_NGS_Ultima_Dual_mode_mRNA_Library_PrepKit_for_MGI	150	18.3	MGISEQ-2000RS		V350102815	V350102815_lane01_lane02	56956502	429	T2
lab31_202220	200	PolyA(+)_enrichment	FALSE	Yeasen	Hieff_NGS_Ultima_Dual_mode_mRNA_Library_PrepKit_for_MGI	150	19.76	MGISEQ-2000RS		V350102815	V350102815_lane03_lane04	56158564	443	T2
lab31_202221	200	PolyA(+)_enrichment	FALSE	Yeasen	Hieff_NGS_Ultima_Dual_mode_mRNA_Library_PrepKit_for_MGI	150	17.18	MGISEQ-2000RS		V350102815	V350102815_lane03_lane04	51213126	441	T2
lab31_202222	200	PolyA(+)_enrichment	FALSE	Yeasen	Hieff_NGS_Ultima_Dual_mode_mRNA_Library_PrepKit_for_MGI	150	17.18	MGISEQ-2000RS		V350102815	V350102815_lane03_lane04	58384634	419	D6
lab31_202223	200	PolyA(+)_enrichment	FALSE	Yeasen	Hieff_NGS_Ultima_Dual_mode_mRNA_Library_PrepKit_for_MGI	150	15.74	MGISEQ-2000RS		V350102815	V350102815_lane03_lane04	52281784	421	D6
lab31_202224	200	PolyA(+)_enrichment	FALSE	Yeasen	Hieff_NGS_Ultima_Dual_mode_mRNA_Library_PrepKit_for_MGI	150	23.88	MGISEQ-2000RS		V350102815	V350102815_lane03_lane04	59452424	410	D6
lab34_202207	500	rRNA_depletion	TRUE	Yeasen	Hieff_NGS_Ultima_Dual_mode_mRNA_Library_PrepKit_for_MGI	150	65.8	DNBSEQ-T7		E100047082	E100047082_lane01	66113224	281	M8
lab34_202208	500	rRNA_depletion	TRUE	Yeasen	Hieff_NGS_Ultima_Dual_mode_mRNA_Library_PrepKit_for_MGI	150	53.6	DNBSEQ-T7		E100047082	E100047082_lane01	59946416	270	M8
lab34_202209	500	rRNA_depletion	TRUE	Yeasen	Hieff_NGS_Ultima_Dual_mode_mRNA_Library_PrepKit_for_MGI	150	41.4	DNBSEQ-T7		E100047082	E100047082_lane01	66562092	287	M8
lab34_202210	500	rRNA_depletion	TRUE	Yeasen	Hieff_NGS_Ultima_Dual_mode_mRNA_Library_PrepKit_for_MGI	150	47.4	DNBSEQ-T7		E100051028	E100051028_lane01	70040030	287	F7
lab34_202211	500	rRNA_depletion	TRUE	Yeasen	Hieff_NGS_Ultima_Dual_mode_mRNA_Library_PrepKit_for_MGI	150	43.2	DNBSEQ-T7		E100047082	E100047082_lane01	59488986	317	F7
lab34_202212	500	rRNA_depletion	TRUE	Yeasen	Hieff_NGS_Ultima_Dual_mode_mRNA_Library_PrepKit_for_MGI	150	41	DNBSEQ-T7		E100047082	E100047082_lane01	60787164	280	F7
lab34_202213	500	rRNA_depletion	TRUE	Yeasen	Hieff_NGS_Ultima_Dual_mode_mRNA_Library_PrepKit_for_MGI	150	73	DNBSEQ-T7		E100047082	E100047082_lane01	70190794	297	D5
lab34_202214	500	rRNA_depletion	TRUE	Yeasen	Hieff_NGS_Ultima_Dual_mode_mRNA_Library_PrepKit_for_MGI	150	66	DNBSEQ-T7		E100047082	E100047082_lane01	83874510	282	D5
lab34_202215	500	rRNA_depletion	TRUE	Yeasen	Hieff_NGS_Ultima_Dual_mode_mRNA_Library_PrepKit_for_MGI	150	65.8	DNBSEQ-T7		E100047082	E100047082_lane01	91042578	294	D5
lab34_202216	500	rRNA_depletion	TRUE	Yeasen	Hieff_NGS_Ultima_Dual_mode_mRNA_Library_PrepKit_for_MGI	150	74.8	DNBSEQ-T7		E100051028	E100051028_lane01	118420718	295	T1
lab34_202217	500	rRNA_depletion	TRUE	Yeasen	Hieff_NGS_Ultima_Dual_mode_mRNA_Library_PrepKit_for_MGI	150	62.6	DNBSEQ-T7		E100047082	E100047082_lane01	96540452	282	T1
lab34_202218	500	rRNA_depletion	TRUE	Yeasen	Hieff_NGS_Ultima_Dual_mode_mRNA_Library_PrepKit_for_MGI	150	40.2	DNBSEQ-T7		E100051028	E100051028_lane01	82698902	282	T1
lab34_202219	500	rRNA_depletion	TRUE	Yeasen	Hieff_NGS_Ultima_Dual_mode_mRNA_Library_PrepKit_for_MGI	150	40	DNBSEQ-T7		E100047082	E100047082_lane01	67116210	301	T2
lab34_202220	500	rRNA_depletion	TRUE	Yeasen	Hieff_NGS_Ultima_Dual_mode_mRNA_Library_PrepKit_for_MGI	150	67.8	DNBSEQ-T7		E100047082	E100047082_lane01	71772792	284	T2
lab34_202221	500	rRNA_depletion	TRUE	Yeasen	Hieff_NGS_Ultima_Dual_mode_mRNA_Library_PrepKit_for_MGI	150	61.4	DNBSEQ-T7		E100047082	E100047082_lane01	99513688	272	T2
lab34_202222	500	rRNA_depletion	TRUE	Yeasen	Hieff_NGS_Ultima_Dual_mode_mRNA_Library_PrepKit_for_MGI	150	42.6	DNBSEQ-T7		E100047082	E100047082_lane01	67282576	276	D6
lab34_202223	500	rRNA_depletion	TRUE	Yeasen	Hieff_NGS_Ultima_Dual_mode_mRNA_Library_PrepKit_for_MGI	150	57	DNBSEQ-T7		E100047082	E100047082_lane01	101293026	278	D6
lab34_202224	500	rRNA_depletion	TRUE	Yeasen	Hieff_NGS_Ultima_Dual_mode_mRNA_Library_PrepKit_for_MGI	150	65	DNBSEQ-T7		E100047082	E100047082_lane01	73418644	286	D6
lab36_202207	500	PolyA(+)_enrichment	FALSE	Yeasen	Hieff_NGS_Ultima_Dual_mode_mRNA_Library_PrepKit_for_MGI	150	42.48	DNBSEQ-T7		E100047151	E100047151_lane01	52838218	373	M8
lab36_202208	500	PolyA(+)_enrichment	FALSE	Yeasen	Hieff_NGS_Ultima_Dual_mode_mRNA_Library_PrepKit_for_MGI	150	73.2	DNBSEQ-T7		E100047151	E100047151_lane01	56797650	388	M8
lab36_202209	500	PolyA(+)_enrichment	FALSE	Yeasen	Hieff_NGS_Ultima_Dual_mode_mRNA_Library_PrepKit_for_MGI	150	36.09	DNBSEQ-T7		E100047151	E100047151_lane01	78961318	385	M8
lab36_202210	500	PolyA(+)_enrichment	FALSE	Yeasen	Hieff_NGS_Ultima_Dual_mode_mRNA_Library_PrepKit_for_MGI	150	35.61	DNBSEQ-T7		E100047151	E100047151_lane01	49058554	412	F7
lab36_202211	500	PolyA(+)_enrichment	FALSE	Yeasen	Hieff_NGS_Ultima_Dual_mode_mRNA_Library_PrepKit_for_MGI	150	36.25	DNBSEQ-T7		E100047151	E100047151_lane01	70711592	392	F7
lab36_202212	500	PolyA(+)_enrichment	FALSE	Yeasen	Hieff_NGS_Ultima_Dual_mode_mRNA_Library_PrepKit_for_MGI	150	37.07	DNBSEQ-T7		E100047151	E100047151_lane01	56106284	452	F7
lab36_202213	500	PolyA(+)_enrichment	FALSE	Yeasen	Hieff_NGS_Ultima_Dual_mode_mRNA_Library_PrepKit_for_MGI	150	38.2	DNBSEQ-T7		E100047151	E100047151_lane01	101938058	437	D5
lab36_202214	500	PolyA(+)_enrichment	FALSE	Yeasen	Hieff_NGS_Ultima_Dual_mode_mRNA_Library_PrepKit_for_MGI	150	27.51	DNBSEQ-T7		E100047151	E100047151_lane01	74530712	427	D5
lab36_202215	500	PolyA(+)_enrichment	FALSE	Yeasen	Hieff_NGS_Ultima_Dual_mode_mRNA_Library_PrepKit_for_MGI	150	43.59	DNBSEQ-T7		E100047151	E100047151_lane01	67079126	432	D5
lab36_202216	500	PolyA(+)_enrichment	FALSE	Yeasen	Hieff_NGS_Ultima_Dual_mode_mRNA_Library_PrepKit_for_MGI	150	39.56	DNBSEQ-T7		E100047151	E100047151_lane01	58437872	394	T1
lab36_202217	500	PolyA(+)_enrichment	FALSE	Yeasen	Hieff_NGS_Ultima_Dual_mode_mRNA_Library_PrepKit_for_MGI	150	29.52	DNBSEQ-T7		E100047151	E100047151_lane01	69324854	408	T1
lab36_202218	500	PolyA(+)_enrichment	FALSE	Yeasen	Hieff_NGS_Ultima_Dual_mode_mRNA_Library_PrepKit_for_MGI	150	46.3	DNBSEQ-T7		E100047151	E100047151_lane01	58987336	394	T1
lab36_202219	500	PolyA(+)_enrichment	FALSE	Yeasen	Hieff_NGS_Ultima_Dual_mode_mRNA_Library_PrepKit_for_MGI	150	35.7	DNBSEQ-T7		E100047151	E100047151_lane01	77391336	397	T2
lab36_202220	500	PolyA(+)_enrichment	FALSE	Yeasen	Hieff_NGS_Ultima_Dual_mode_mRNA_Library_PrepKit_for_MGI	150	29.75	DNBSEQ-T7		E100047151	E100047151_lane01	73531484	385	T2
lab36_202221	500	PolyA(+)_enrichment	FALSE	Yeasen	Hieff_NGS_Ultima_Dual_mode_mRNA_Library_PrepKit_for_MGI	150	27.03	DNBSEQ-T7		E100047151	E100047151_lane01	83714358	412	T2
lab36_202222	500	PolyA(+)_enrichment	FALSE	Yeasen	Hieff_NGS_Ultima_Dual_mode_mRNA_Library_PrepKit_for_MGI	150	25.88	DNBSEQ-T7		E100047151	E100047151_lane01	72688822	406	D6
lab36_202223	500	PolyA(+)_enrichment	FALSE	Yeasen	Hieff_NGS_Ultima_Dual_mode_mRNA_Library_PrepKit_for_MGI	150	24.21	DNBSEQ-T7		E100047151	E100047151_lane01	79624826	415	D6
lab36_202224	500	PolyA(+)_enrichment	FALSE	Yeasen	Hieff_NGS_Ultima_Dual_mode_mRNA_Library_PrepKit_for_MGI	150	35.63	DNBSEQ-T7		E100047151	E100047151_lane01	82941982	380	D6
lab38_202207	500	rRNA_depletion	TRUE	NEB	The_NEBNext_UltraII_DNA_Library_Prep_Kit	100	97.33	DNBSEQ-T7RS		E100047343	E100047343_lane01	144821816	216	M8
lab38_202208	500	rRNA_depletion	TRUE	NEB	The_NEBNext_UltraII_DNA_Library_Prep_Kit	100	106.4	DNBSEQ-T7RS		E100047343	E100047343_lane01	150205736	216	M8
lab38_202209	500	rRNA_depletion	TRUE	NEB	The_NEBNext_UltraII_DNA_Library_Prep_Kit	100	106.9	DNBSEQ-T7RS		E100047343	E100047343_lane01	134942170	220	M8
lab38_202210	500	rRNA_depletion	TRUE	NEB	The_NEBNext_UltraII_DNA_Library_Prep_Kit	100	126.18	DNBSEQ-T7RS		E100047343	E100047343_lane01	121456720	225	F7
lab38_202211	500	rRNA_depletion	TRUE	NEB	The_NEBNext_UltraII_DNA_Library_Prep_Kit	100	111.09	DNBSEQ-T7RS		E100047343	E100047343_lane01	122260274	226	F7
lab38_202212	500	rRNA_depletion	TRUE	NEB	The_NEBNext_UltraII_DNA_Library_Prep_Kit	100	115.68	DNBSEQ-T7RS		E100047343	E100047343_lane01	108372230	222	F7
lab38_202213	500	rRNA_depletion	TRUE	NEB	The_NEBNext_UltraII_DNA_Library_Prep_Kit	100	103.33	DNBSEQ-T7RS		E100047343	E100047343_lane01	115774606	227	D5
lab38_202214	500	rRNA_depletion	TRUE	NEB	The_NEBNext_UltraII_DNA_Library_Prep_Kit	100	111.01	DNBSEQ-T7RS		E100047343	E100047343_lane01	118894598	233	D5
lab38_202215	500	rRNA_depletion	TRUE	NEB	The_NEBNext_UltraII_DNA_Library_Prep_Kit	100	80.96	DNBSEQ-T7RS		E100047343	E100047343_lane01	102140744	233	D5
lab38_202216	500	rRNA_depletion	TRUE	NEB	The_NEBNext_UltraII_DNA_Library_Prep_Kit	100	128.91	DNBSEQ-T7RS		E100047343	E100047343_lane01	107351072	209	T1
lab38_202217	500	rRNA_depletion	TRUE	NEB	The_NEBNext_UltraII_DNA_Library_Prep_Kit	100	131.16	DNBSEQ-T7RS		E100047343	E100047343_lane01	127615304	216	T1
lab38_202218	500	rRNA_depletion	TRUE	NEB	The_NEBNext_UltraII_DNA_Library_Prep_Kit	100	116.16	DNBSEQ-T7RS		E100047343	E100047343_lane01	117504066	221	T1
lab38_202219	500	rRNA_depletion	TRUE	NEB	The_NEBNext_UltraII_DNA_Library_Prep_Kit	100	117.53	DNBSEQ-T7RS		E100047343	E100047343_lane01	102891202	222	T2
lab38_202220	500	rRNA_depletion	TRUE	NEB	The_NEBNext_UltraII_DNA_Library_Prep_Kit	100	111.33	DNBSEQ-T7RS		E100047343	E100047343_lane01	116735144	220	T2
lab38_202221	500	rRNA_depletion	TRUE	NEB	The_NEBNext_UltraII_DNA_Library_Prep_Kit	100	129.93	DNBSEQ-T7RS		E100047343	E100047343_lane01	95339474	231	T2
lab38_202222	500	rRNA_depletion	TRUE	NEB	The_NEBNext_UltraII_DNA_Library_Prep_Kit	100	120.77	DNBSEQ-T7RS		E100047343	E100047343_lane01	123804030	212	D6
lab38_202223	500	rRNA_depletion	TRUE	NEB	The_NEBNext_UltraII_DNA_Library_Prep_Kit	100	95.32	DNBSEQ-T7RS		E100047343	E100047343_lane01	133382232	228	D6
lab38_202224	500	rRNA_depletion	TRUE	NEB	The_NEBNext_UltraII_DNA_Library_Prep_Kit	100	125.32	DNBSEQ-T7RS		E100047343	E100047343_lane01	124041490	216	D6
lab45_202207	500	PolyA(+)_enrichment	TRUE	Roche	KAPA_RNA_HyperPrep_Kit	150	3.8	MGISEQ-2000		V350098848	lane01+02+03+04	86996806	239	M8
lab45_202208	500	PolyA(+)_enrichment	TRUE	Roche	KAPA_RNA_HyperPrep_Kit	150	4.3	MGISEQ-2000		V350098848	lane01+02+03+04	93261630	245	M8
lab45_202209	500	PolyA(+)_enrichment	TRUE	Roche	KAPA_RNA_HyperPrep_Kit	150	4.34	MGISEQ-2000		V350098848	lane01+02+03+04	87936026	243	M8
lab45_202210	500	PolyA(+)_enrichment	TRUE	Roche	KAPA_RNA_HyperPrep_Kit	150	4.1	MGISEQ-2000		V350098848	lane01+02+03+04	80106188	249	F7
lab45_202211	500	PolyA(+)_enrichment	TRUE	Roche	KAPA_RNA_HyperPrep_Kit	150	3.94	MGISEQ-2000		V350098848	lane01+02+03+04	90734124	248	F7
lab45_202212	500	PolyA(+)_enrichment	TRUE	Roche	KAPA_RNA_HyperPrep_Kit	150	4.26	MGISEQ-2000		V350098848	lane01+02+03+04	89188218	246	F7
lab45_202213	500	PolyA(+)_enrichment	TRUE	Roche	KAPA_RNA_HyperPrep_Kit	150	5.08	MGISEQ-2000		V350098848	lane01+02+03+04	86338348	249	D5
lab45_202214	500	PolyA(+)_enrichment	TRUE	Roche	KAPA_RNA_HyperPrep_Kit	150	3.88	MGISEQ-2000		V350098848	lane01+02+03+04	90773092	254	D5
lab45_202215	500	PolyA(+)_enrichment	TRUE	Roche	KAPA_RNA_HyperPrep_Kit	150	3.94	MGISEQ-2000		V350098848	lane01+02+03+04	88558986	250	D5
lab45_202216	500	PolyA(+)_enrichment	TRUE	Roche	KAPA_RNA_HyperPrep_Kit	150	4	MGISEQ-2000		V350098848	lane01+02+03+04	81390222	242	T1
lab45_202217	500	PolyA(+)_enrichment	TRUE	Roche	KAPA_RNA_HyperPrep_Kit	150	4.36	MGISEQ-2000		V350098848	lane01+02+03+04	82932274	235	T1
lab45_202218	500	PolyA(+)_enrichment	TRUE	Roche	KAPA_RNA_HyperPrep_Kit	150	4.14	MGISEQ-2000		V350098848	lane01+02+03+04	88083898	242	T1
lab45_202219	500	PolyA(+)_enrichment	TRUE	Roche	KAPA_RNA_HyperPrep_Kit	150	4.96	MGISEQ-2000		V350098848	lane01+02+03+04	81647798	246	T2
lab45_202220	500	PolyA(+)_enrichment	TRUE	Roche	KAPA_RNA_HyperPrep_Kit	150	4.36	MGISEQ-2000		V350098848	lane01+02+03+04	85690842	248	T2
lab45_202221	500	PolyA(+)_enrichment	TRUE	Roche	KAPA_RNA_HyperPrep_Kit	150	3.76	MGISEQ-2000		V350098848	lane01+02+03+04	86179336	243	T2
lab45_202222	500	PolyA(+)_enrichment	TRUE	Roche	KAPA_RNA_HyperPrep_Kit	150	4.14	MGISEQ-2000		V350098848	lane01+02+03+04	86834616	249	D6
lab45_202223	500	PolyA(+)_enrichment	TRUE	Roche	KAPA_RNA_HyperPrep_Kit	150	3.9	MGISEQ-2000		V350098848	lane01+02+03+04	88637056	249	D6
lab45_202224	500	PolyA(+)_enrichment	TRUE	Roche	KAPA_RNA_HyperPrep_Kit	150	2.66	MGISEQ-2000		V350098848	lane01+02+03+04	86102912	242	D6
