# Supplementary material for: Benchmarking RNA-seq with the Quartet Reference Materials to establish Best Practices for Accurate Alternative Splicing Detection
Source: Research Square preprint supplement (doi:10.21203/rs.3.rs-7716867/v1), 2025-11-05
Supplement: Supplementary file 5 [file c8f8bf9183d9f1240f964d93.xlsx]

## Sheet: Isoform
Supplementary Data 5. The RT-qPCR reference datasets for alternative splicing events.
transcript_id	value_1	value_2	value_3	log2FC	p_value	DEG	sample_pair	Gene_Id
ENST00000377507	0.11354	0.108185	0.11052	0.383268	0.000237897	NonDEG	M8/D6	TNFRSF9
ENST00000005260	0.0394899	0.0408993	0.0397046	-0.442611	3.16511e-05	NonDEG	M8/D6	BAIAP2L1
ENST00000335661	0.107814	0.107924	0.109224	-1.4315	0.000434175	down-regulate	M8/D6	BCL2A1
ENST00000321870	0.0014347	0.0011132	0.00104213	0.683115	0.0654059	NonDEG	M8/D6	BHLHE22
ENST00000329759	0.0924363	0.0897595	0.100584	0.306127	0.00565122	NonDEG	M8/D6	FAM43A
ENST00000255695	0.00424995	0.00390298	0.00396988	-0.342605	0.000887264	NonDEG	M8/D6	PLAAT2
ENST00000313104	0.0178342	0.0179154	0.0188176	-3.67276	2.90015e-09	down-regulate	M8/D6	RPLPO
ENST00000455959	0.0180534	0.0134983	0.0182601	-0.931608	0.00125386	NonDEG	M8/D6	SEC11A
ENST00000367495	0.00787702	0.00984846	0.00781773	-0.997762	0.000741651	NonDEG	M8/D6	RAB32
ENST00000379287	0.216114	0.152283	0.200477	0.0594396	0.779179	NonDEG	M8/D6	GFOD1
ENST00000370078	0.0858172	0.093851	0.0801109	0.040377	0.623099	NonDEG	M8/D6	PRM76
ENST00000427159	0.126624	0.160442	0.11224	-0.243391	0.263698	NonDEG	M8/D6	FTSJ3
ENST00000380752	0.180671	0.140969	0.182139	-0.242171	0.154204	NonDEG	M8/D6	SLC7A1
ENST00000311177	0.0525541	0.0485927	0.0571325	0.654562	0.00735434	NonDEG	M8/D6	HOXB9
ENST00000381077	0.302193	0.231626	0.230511	0.31017	0.178406	NonDEG	M8/D6	PUDP
ENSG00000021355	0.153305	0.18117	0.151525	-0.548326	0.0301766	NonDEG	M8/D6	SERPINB1
ENST00000314133	1.0647	0.881898	1.04286	0.0667527	0.5563	NonDEG	M8/D6	COX8A
ENST00000241261	0.204263	0.193531	0.196714	-0.307077	0.00143579	NonDEG	M8/D6	TNFSF10
ENST00000407280	5.02492	4.7492	4.67875	0.244775	0.0151188	NonDEG	M8/D6	IFI30
ENST00000367029	0.613959	0.597203	0.670286	-1.004	0.000126933	down-regulate	M8/D6	G0S2
ENST00000291232	1.56466		1.50635	-0.0784303	0.13302	NonDEG	M8/D6	TNFRSF13C
ENST00000266557	0.374763	0.448728	0.417968	-0.977645	0.000257097	NonDEG	M8/D6	CD27
ENST00000248958	0.0627165	0.0636761	0.063215	-1.08316	0.000708458	down-regulate	M8/D6	SDF2L1
ENST00000341184	0.149554	0.182039	0.144388	0.811304	0.0283985	NonDEG	M8/D6	MGAT3
ENST00000257527	0.0188056	0.0185692	0.0164301	-0.830005	0.000116506	NonDEG	M8/D6	ADAM19
ENST00000569669	0.085232	0.0850123	0.0817642	-0.423886	0.00237202	NonDEG	M8/D6	BOP1
ENST00000005257	0.0456155	0.0518849	0.0494963	-0.188117	0.226469	NonDEG	M8/D6	RALA
ENST00000367511	0.303065	0.335155	0.283938	-0.84106	0.000506305	NonDEG	M8/D6	NIBAN1
ENST00000552695	0.0454181	0.0459865	0.0378187	-1.02301	0.0138273	down-regulate	M8/D6	FICD
ENST00000261837	0.016376	0.0161635	0.0177443	-0.496258	0.00727221	NonDEG	M8/D6	GNB5
ENST00000275072	0.0504263	0.0516756		-0.315062	0.145389	NonDEG	M8/D6	PM20D2
ENST00000302754	0.806287	0.767678	0.740454	-0.347197	0.00698694	NonDEG	M8/D6	JUNB
ENST00000243347	0.000428949	0.000526666	0.000444752	0.0874169	0.443357	NonDEG	M8/D6	TNFAIP6
ENST00000313401	0.156454		0.132935	-0.732925	0.00731679	NonDEG	M8/D6	CDK5R1
ENST00000597705	0.036204	0.0333925	0.0334273	1.56857	0.00142801	up-regulate	M8/D6	C19orf48P
ENST00000380861	0.0141259	0.0147526	0.0141081	-2.61941	0.000591439	down-regulate	M8/D6	WWC3
ENST00000372733	0.0488824	0.0472175	0.0487708	0.416483	2.53668e-05	NonDEG	M8/D6	SDC4
ENST00000390556	0.499676	0.482757	0.525396	-0.712701	0.0131091	NonDEG	M8/D6	IGHD
ENST00000417314	0.0261236	0.0253833	0.026406	-0.601901	0.000889221	NonDEG	M8/D6	KBTBD8
ENST00000310597	0.0348646	0.0369416	0.028876	-0.502553	0.0154576	NonDEG	M8/D6	ZNHIT2
ENST00000336735	0.207948	0.209674	0.218679	-1.39158	1.33525e-05	down-regulate	M8/D6	SEL1L
ENST00000557434	0.0130406	0.0105932	0.0109876	-1.42627	0.000262382	down-regulate	M8/D6	LGMN
ENST00000332503	0.241688	0.264239	0.219376	1.02061	0.000798216	up-regulate	M8/D6	HOBX4
ENST00000247225		0.335039	0.418533	0.255462	0.156528	NonDEG	M8/D6	SGPP1
ENST00000381938	0.192927	0.170262	0.175186	0.00545404	0.937559	NonDEG	M8/D6	TMEM156
ENST00000261867	0.00417002	0.00474693	0.003935	-1.6006	1.20753e-05	down-regulate	M8/D6	SLC30A4
ENST00000379607	0.0885656	0.104792	0.0801564	-0.151142	0.250507	NonDEG	M8/D6	EIF2AX
ENST00000382247	0.0660122	0.0658079	0.0560292	0.057818	0.685742	NonDEG	M8/D6	DCAF16
ENST00000392456	0.687891	0.779468	0.6131	-0.839756	0.000943973	NonDEG	M8/D6	CCDC50
ENST00000223273	0.0335412	0.0386793		-0.758616	0.00963118	NonDEG	M8/D6	YAE1
ENST00000294507	17.2588	18.2408	18.4328	0.766098	6.64564e-05	NonDEG	M8/D6	LAPTM5
ENST00000269397	0.12678	0.127061	0.101663	-0.0321996	0.863127	NonDEG	M8/D6	CBX4
ENST00000447079	0.0945171	0.0993411	0.0936788	0.251536	0.0057295	NonDEG	M8/D6	CDK12
ENST00000220507	0.103613	0.0978052	0.0961216	0.30005	0.00179825	NonDEG	M8/D6	RHOV
ENST00000291906	0.0653462	0.0657423	0.0667324	0.809856	2.97217e-06	NonDEG	M8/D6	PKN3
ENST00000260197	0.951053	1.01844	0.902617	0.444827	0.00179854	NonDEG	M8/D6	SDRL1
ENST00000238508	0.337277	0.340081	0.37144	1.10876	0.000123962	up-regulate	M8/D6	SERPINB10
ENST00000349499	0.172049	0.172695	0.167914	0.121647	0.121929	NonDEG	M8/D6	CLIC6
ENST00000327355	0.0722378	0.0721774	0.0755322	0.349452	0.00295043	NonDEG	M8/D6	FAM174B
ENST00000302277	0.000826329	0.000916516	0.000975739	-2.63446	1.20013e-05	down-regulate	M8/D6	ZNF804A
ENST00000250916	0.0699926	0.065481	0.078387	0.0775493	0.665122	NonDEG	M8/D6	KLF16
ENST00000318528	0.0141427	0.0141598	0.013656	-1.07725	6.78651e-05	down-regulate	M8/D6	ERICH5
ENST00000227451	0.17034	0.16938	0.152254	-0.320706	0.00535728	NonDEG	M8/D6	DTX4
ENST00000355085	0.0217004	0.0198481	0.0198864	0.614782	0.00111194	NonDEG	M8/D6	C5AR1
ENST00000264538	0.0069406	0.00656151	0.00660273	-2.96661	0.000200324	down-regulate	M8/D6	IFT57
ENST00000274026	0.0762077	0.0748753	0.0797094	1.2974	9.15347e-06	up-regulate	M8/D6	CCNA2
ENST00000361453	31.5329	32.3676	29.845	-0.128384	0.0694922	NonDEG	M8/D6	MT-ND2
ENST00000312184	0.0264083	0.0259525	0.0278444	-0.01595	0.649883	NonDEG	M8/D6	TMEM70
ENST00000284311	1.07034	1.11677	1.08963	-0.280691	0.0018961	NonDEG	M8/D6	GPR15
ENST00000381401	1.23127	1.17142	1.32229	0.0742708	0.383244	NonDEG	M8/D6	SLC25A6
ENST00000370141	0.0927542	0.0850791	0.0938164	-0.654735	0.000167006	NonDEG	M8/D6	TRMT13
ENST00000357164	1.08023	1.01627	1.08526	0.419532	0.000523374	NonDEG	M8/D6	GM2A
ENST00000228438	0.00229953	0.00286007	0.00244929	-2.15382	0.000481607	down-regulate	M8/D6	CLEC2B
ENST00000369448	0.0251402	0.0216617	0.0222216	-1.62528	2.5355e-06	down-regulate	M8/D6	TENT5C
ENST00000393067	2.11001	2.00217	1.90433	-0.457438	0.000459562	NonDEG	M8/D6	POU2AF1
ENST00000379638	0.159893	0.176091	0.168002	-0.266981	0.00253041	NonDEG	M8/D6	REEP5
ENST00000299977	0.0217195	0.0230936	0.0234702	-3.82438	0.000577115	down-regulate	M8/D6	SLFN5
ENST00000319332	0.0538629	0.055968	0.0617695	0.40716	0.006098	NonDEG	M8/D6	P3H2
ENST00000291750	0.104414	0.0987555	0.101628	-0.105039	0.0207479	NonDEG	M8/D6	ZNF626
ENST00000266646	0.000114217	0.00010515	0.000110638	-0.972987	7.95982e-05	NonDEG	M8/D6	INHBE
ENST00000372715	0.0736051	0.0777915	0.0735485	0.306018	0.000585168	NonDEG	M8/D6	DYNC2I2
ENST00000264233	0.0180763	0.0194822	0.018859	0.775886	9.72237e-05	NonDEG	M8/D6	POLQ
ENST00000374279	0.434025	0.450001	0.481471	-0.188868	0.035113	NonDEG	M8/D6	UGCG
ENST00000296658	0.00467732	0.00481804	0.00491679	0.179097	0.00195699	NonDEG	M8/D6	CMBL
ENST00000304661	0.0504106	0.0530048	0.0497728	-0.185012	0.0723096	NonDEG	M8/D6	C1GALT1C1
ENST00000262352	0.116532	0.109145	0.109794	-0.204171	0.00334178	NonDEG	M8/D6	SLC1A1
ENST00000355653	0.0944185	0.0860652	0.0867322	-0.106699	0.0834506	NonDEG	M8/D6	VAT1
ENST00000539680	0.0118213	0.0123676	0.0124466	-1.15926	3.89995e-05	down-regulate	M8/D6	ECHDC2
ENST00000647941	0.178128	0.179493	0.183363	-0.179802	0.00221491	NonDEG	M8/D6	CPOX
ENST00000199448	0.0252897	0.0252527	0.0246237	1.40475	0.000148379	up-regulate	M8/D6	EPDR1
ENST00000269385	0.0449083	0.0455333	0.0457053	0.411614	0.000192888	NonDEG	M8/D6	CBX8
ENST00000246115	0.0436643	0.0435192	0.0429902	-0.353571	0.000372811	NonDEG	M8/D6	S1PR4
ENST00000376215	0.080817	0.0790462	0.0806995	-0.272783	0.00126862	NonDEG	M8/D6	PDSS1
ENST00000254998	0.110725	0.112026	0.107206	-0.0683396	0.0436317	NonDEG	M8/D6	NXT1
ENST00000237853	0.530187	0.543283	0.571292	-0.915824	1.43671e-05	NonDEG	M8/D6	ELL2
ENST00000292174	0.033004	0.0323466	0.0326285	-1.32478	0.0173307	down-regulate	M8/D6	CXCR5
ENST00000257575	0.0236731	0.02468	0.0237033	0.370105	0.00363624	NonDEG	M8/D6	RNFT2
ENST00000246070	0.134711	0.138662	0.136528	1.17097	3.71144e-07	up-regulate	M8/D6	LAMP5
ENST00000227507	0.0808605	0.0792701	0.0740677	0.397103	0.00116609	NonDEG	M8/D6	CCND1
ENST00000229238	0.516702	0.38832	0.380798	-0.208199	0.265659	NonDEG	M8/D6	MRPL51
ENST00000355897	0.103656	0.10058	0.106082	-1.77494	5.7401e-07	down-regulate	M8/D6	GPR160
ENST00000378024	0.178922	0.180791	0.141095	0.817801	0.00579633	NonDEG	M8/D6	AHNAK
ENST00000327535	0.0176294	0.0188661	0.0180725	-0.814196	0.000218642	NonDEG	M8/D6	IFNLR1
ENST00000312960	0.151882	0.148722	0.158394	-0.206739	0.0298476	NonDEG	M8/D6	SIAH2
ENST00000368468	0.375089	0.322297	0.328293	-0.539084	0.00137462	NonDEG	M8/D6	MAN1A1
ENST00000361314	0.0128877	0.0124712	0.0113715	-1.60422	2.17121e-06	down-regulate	M8/D6	GPX7
ENST00000339992	0.0266986	0.0283236	0.0262149	-0.403071	0.000413215	NonDEG	M8/D6	HMX2
ENST00000216115	0.145577	0.178185	0.169491	1.19549	0.0105653	up-regulate	M8/D6	BIK
ENST00000361624	164.087	175.559	161.59	0.145034	0.0326491	NonDEG	M8/D6	MT-CO1
ENST00000552695	0.0891347	0.0835469	0.0820516	-0.523602	0.000291446	NonDEG	M8/D6	FICD
ENST00000349499	0.421765	0.43871	0.402622	0.318067	0.00175012	NonDEG	M8/D6	CLIC6
ENST00000357878	0.0283517	0.028104	0.0282439	-2.27221	0.0018559	down-regulate	M8/D6	HMX3
ENST00000276914	0.284452	0.315191	0.28006	-0.0702055	0.271751	NonDEG	M8/D6	PLIN2
ENST00000313683	0.00484572	0.00537151	0.00477975	-1.381	0.000524233	down-regulate	M8/D6	PNMA8A
ENST00000299572		0.0169981	0.0235146	-0.0158379	0.945332	NonDEG	M8/D6	CENPN
ENST00000334512	0.0223175	0.0236237	0.0245713	-0.209751	0.00746893	NonDEG	M8/D6	ZMIZ1
ENST00000376759	0.0602088	0.0647865	0.0577309	0.0562607	0.432308	NonDEG	M8/D6	RBM3
ENST00000264433	0.0983424	0.0887067	0.0923348	-0.517743	0.00272033	NonDEG	M8/D6	FNIP2
ENST00000254799	0.022199	0.0244255	0.0234426	-0.319936	0.0026012	NonDEG	M8/D6	GRSF1
ENST00000588361	0.0299771	0.027339	0.0265954	0.498713	0.0152108	NonDEG	M8/D6	KDM4B
ENST00000322128	0.0636581	0.057541	0.0594932	-0.070275	0.322238	NonDEG	M8/D6	TSPYL5
ENST00000377507	0.0669001	0.0717086	0.0718872	-0.27519	0.00230627	NonDEG	F7/D6	TNFRSF9
ENST00000005260	0.112583	0.118268	0.121193	1.10898	1.68413e-05	up-regulate	F7/D6	BAIAP2L1
ENST00000335661	0.277234	0.309213	0.307937	0.0291204	0.62394	NonDEG	F7/D6	BCL2A1
ENST00000256447	0.118824	0.110159	0.112173	-1.10163	4.80589e-06	down-regulate	F7/D6	CD180
ENST00000329759	0.081553	0.0769864	0.0607924	-0.0604392	0.669459	NonDEG	F7/D6	FAM43A
ENST00000255695	0.00369905	0.00365621	0.00390904	-0.448571	0.000154421	NonDEG	F7/D6	PLAAT2
ENST00000313104	0.395148	0.482325	0.470198	0.953529	0.015295	NonDEG	F7/D6	RPLPO
ENST00000455959	0.0257763		0.0226473	-0.387426	0.0238725	NonDEG	F7/D6	SEC11A
ENST00000367495	0.0117411	0.0121443	0.010808	-0.556039	0.00179812	NonDEG	F7/D6	RAB32
ENST00000379287	0.150236		0.143333	-0.310006	0.0207795	NonDEG	F7/D6	GFOD1
ENST00000370078	0.095849	0.0825582		0.0832283	0.440121	NonDEG	F7/D6	PRM76
ENST00000427159	0.114557		0.116115	-0.450081	0.0759682	NonDEG	F7/D6	FTSJ3
ENST00000380752	0.197698	0.214388	0.215295	0.0743802	0.448688	NonDEG	F7/D6	SLC7A1
ENST00000311177	0.0101668	0.00959825	0.0114381	-1.68815	0.00148428	down-regulate	F7/D6	HOXB9
ENST00000381077	0.120744	0.10868	0.129469	-0.78047	0.0120902	NonDEG	F7/D6	PUDP
ENSG00000021355	0.0944578	0.0899814	0.0893365	-1.37629	0.0189803	down-regulate	F7/D6	SERPINB1
ENST00000314133	1.1038	1.07876	1.13812	0.218348	0.0236793	NonDEG	F7/D6	COX8A
ENST00000241261	0.188403	0.189846	0.196664	-0.355432	0.000711861	NonDEG	F7/D6	TNFSF10
ENST00000407280	4.01922	3.99107	3.92884	-0.0308843	0.60455	NonDEG	F7/D6	IFI30
ENST00000367029	1.08999	1.06227	1.052	-0.235853	0.00803584	NonDEG	F7/D6	G0S2
ENST00000291232	1.40612	1.41108	1.39023	-0.209168	0.00153549	NonDEG	F7/D6	TNFRSF13C
ENST00000266557	0.613156	0.656456	0.587919	-0.396294	0.00357095	NonDEG	F7/D6	CD27
ENST00000248958	0.092874	0.0986139	0.0853584	-0.537091	0.000672245	NonDEG	F7/D6	SDF2L1
ENST00000257527	0.0253402	0.0246505	0.0259301	-0.333243	0.00057092	NonDEG	F7/D6	ADAM19
ENST00000569669	0.103103	0.0946317	0.0954755	-0.205424	0.0367968	NonDEG	F7/D6	BOP1
ENST00000005257	0.0475343	0.0562283	0.0548001	-0.0788476	0.596639	NonDEG	F7/D6	RALA
ENST00000361314	0.0234844	0.0233388	0.0234858	-0.2017	0.00635039	NonDEG	F7/D6	GPX7
ENST00000327535	0.0323688	0.0328818	0.0339517	0.0481205	0.388335	NonDEG	F7/D6	IFNLR1
ENST00000367511	0.636862	0.624912	0.540045	0.125307	0.232961	NonDEG	F7/D6	NIBAN1
ENST00000275072	0.0376336	0.042124	0.0333118	-0.752824	0.00957911	NonDEG	F7/D6	PM20D2
ENST00000302754	0.746979	0.634711	0.683155	-0.511814	0.00388387	NonDEG	F7/D6	JUNB
ENST00000243347	0.000222953		0.000192047	-1.08224	0.00109796	down-regulate	F7/D6	TNFAIP6
ENST00000313401	0.166354	0.149338	0.144527	-0.648578	0.00151249	NonDEG	F7/D6	CDK5R1
ENST00000597705	0.0125338	0.0129114	0.0121737	0.115126	0.0172784	NonDEG	F7/D6	C19orf48P
ENST00000380861	0.0691237	0.069748	0.068385	-0.349953	0.000635455	NonDEG	F7/D6	WWC3
ENST00000372733	0.0337927	0.0306856	0.0318731	-0.171905	0.0439869	NonDEG	F7/D6	SDC4
ENST00000390556	0.894117	0.966669	0.85351	0.135404	0.376106	NonDEG	F7/D6	IGHD
ENST00000417314	0.0331613	0.0341169	0.0340563	-0.22271	0.0204564	NonDEG	F7/D6	KBTBD8
ENST00000310597	0.049461		0.0405389	-0.0794028	0.618595	NonDEG	F7/D6	ZNHIT2
ENST00000557434	0.0221515	0.0231227	0.0209609	-0.490341	0.00441338	NonDEG	F7/D6	LGMN
ENST00000332503	0.0984353	0.0994847	0.0746734	-0.391223	0.0328597	NonDEG	F7/D6	HOBX4
ENST00000247225	0.188863	0.201667	0.243273	-0.579211	0.0043686	NonDEG	F7/D6	SGPP1
ENST00000381938	0.132242	0.117156	0.119998	-0.53799	0.000920882	NonDEG	F7/D6	TMEM156
ENST00000261867	0.00753079	0.00767102	0.00664692	-0.835039	0.000127618	NonDEG	F7/D6	SLC30A4
ENST00000379607	0.068928	0.0712601	0.0731055	-0.509917	0.000206126	NonDEG	F7/D6	EIF2AX
ENST00000382247	0.0776798	0.0820153	0.0819234	0.420972	0.0132662	NonDEG	F7/D6	DCAF16
ENST00000392456	0.649389	0.768984	0.776082	-0.762795	0.00089178	NonDEG	F7/D6	CCDC50
ENST00000223273	0.0541331	0.0490889	0.0640621	-0.131757	0.369321	NonDEG	F7/D6	YAE1
ENST00000294507	7.62303	6.66238	7.15652	-0.564618	0.000680061	NonDEG	F7/D6	LAPTM5
ENST00000269397	0.120451	0.114097	0.0943472	-0.144438	0.462917	NonDEG	F7/D6	CBX4
ENST00000447079	0.075837	0.0802824	0.0827296	-0.0161133	0.781087	NonDEG	F7/D6	CDK12
ENST00000220507	0.15484	0.152063	0.170401	0.981873	0.000173544	NonDEG	F7/D6	RHOV
ENST00000291906	0.0601185	0.052563	0.054671	0.568551	0.00147643	NonDEG	F7/D6	PKN3
ENST00000260197	0.698085	0.665543	0.625587	-0.0850841	0.145051	NonDEG	F7/D6	SDRL1
ENST00000238508	0.690058	0.656102	0.618382	2.01422	2.22771e-05	up-regulate	F7/D6	SERPINB10
ENST00000327355	0.217779	0.213429	0.270222	2.02259	0.00975967	up-regulate	F7/D6	FAM174B
ENST00000302277	0.0361681	0.0338507	0.0321034	2.59683	0.00140968	up-regulate	F7/D6	ZNF804A
ENST00000250916	0.0530384	0.0705947	0.0501545	-0.221796	0.368677	NonDEG	F7/D6	KLF16
ENST00000312960	0.0936593	0.0947135	0.0996619	-0.788174	0.210099	NonDEG	F7/D6	SIAH2
ENST00000318528	0.0137177	0.0132806	0.0130761	-1.14353	5.92117e-05	down-regulate	F7/D6	ERICH5
ENST00000227451	0.297842	0.309112	0.305946	0.57117	6.14192e-05	NonDEG	F7/D6	DTX4
ENST00000355085	0.00384028	0.00383834	0.00377963	-1.80789	0.00374064	down-regulate	F7/D6	C5AR1
ENST00000264538	0.100727	0.103739	0.104965	0.977388	4.19535e-06	NonDEG	F7/D6	IFT57
ENST00000274026	0.027998	0.0275851	0.0292489	-0.146521	0.0253542	NonDEG	F7/D6	CCNA2
ENST00000361453	44.8015	42.8653	44.3897	0.365949	0.000830599	NonDEG	F7/D6	MT-ND2
ENST00000312184	0.019931	0.0201963	0.0192384	-0.450015	3.33446e-05	NonDEG	F7/D6	TMEM70
ENST00000284311	1.06891	1.09821	1.04617	-0.308903	0.00148369	NonDEG	F7/D6	GPR15
ENST00000381401	1.67365	1.77907	1.79182	0.567859	0.00178442	NonDEG	F7/D6	SLC25A6
ENST00000370141	0.139939	0.131234	0.131739	-0.0860155	0.0994155	NonDEG	F7/D6	TRMT13
ENST00000357164	0.883673	0.846702	0.813347	0.0966495	0.0901315	NonDEG	F7/D6	GM2A
ENST00000228438	0.00580603	0.00610795	0.00602193	-0.916731	0.00175206	NonDEG	F7/D6	CLEC2B
ENST00000369448	0.0378319	0.034926	0.0376194	-0.947998	6.39725e-06	NonDEG	F7/D6	TENT5C
ENST00000393067	2.66958	2.65009	2.53156	-0.0734454	0.0783871	NonDEG	F7/D6	POU2AF1
ENST00000379638	0.162475	0.149242	0.154758	-0.378566	0.000412586	NonDEG	F7/D6	REEP5
ENST00000299977	0.478369	0.469896	0.478	0.560186	4.21602e-05	NonDEG	F7/D6	SLFN5
ENST00000319332	0.050267	0.0572512	0.0620784	0.390214	0.021106	NonDEG	F7/D6	P3H2
ENST00000291750	0.0560471	0.0568018	0.0533469	-0.980006	5.24002e-06	NonDEG	F7/D6	ZNF626
ENST00000266646	9.8323e-05	9.3156e-05		-1.17333	0.000548743	down-regulate	F7/D6	INHBE
ENST00000372715	0.0615032	0.0586095	0.0578044	-0.03235	0.316802	NonDEG	F7/D6	DYNC2I2
ENST00000264233	0.0101478	0.0100713	0.0106499	-0.0941023	0.112725	NonDEG	F7/D6	POLQ
ENST00000374279	0.44813	0.428763	0.436106	-0.245428	0.0068597	NonDEG	F7/D6	UGCG
ENST00000296658	0.00433904	0.00502656	0.00436793	0.109512	0.273222	NonDEG	F7/D6	CMBL
ENST00000304661	0.0461942	0.0475562	0.0492915	-0.283879	0.0219979	NonDEG	F7/D6	C1GALT1C1
ENST00000262352	0.108759	0.110024	0.105046	-0.255125	0.000488047	NonDEG	F7/D6	SLC1A1
ENST00000355653	0.113264	0.110278	0.108527	0.206777	0.00147183	NonDEG	F7/D6	VAT1
ENST00000539680	0.0234909	0.0255416	0.0242432	-0.159163	0.040047	NonDEG	F7/D6	ECHDC2
ENST00000647941	0.189214	0.188747	0.183998	-0.124923	0.00818351	NonDEG	F7/D6	CPOX
ENST00000199448	0.019524	0.0197007	0.0191204	0.896767	0.000783245	NonDEG	F7/D6	EPDR1
ENST00000269385	0.0415466	0.0415311	0.0431029	0.30194	0.00122552	NonDEG	F7/D6	CBX8
ENST00000246115	0.0442509	0.0432625	0.0390949	-0.393637	0.002253	NonDEG	F7/D6	S1PR4
ENST00000376215	0.114794	0.122684	0.117459	0.288369	0.00215784	NonDEG	F7/D6	PDSS1
ENST00000254998	0.114135	0.111197	0.108316	-0.0522922	0.112789	NonDEG	F7/D6	NXT1
ENST00000237853	0.848208	0.851221	0.807927	-0.307537	0.000621386	NonDEG	F7/D6	ELL2
ENST00000292174	0.0859394	0.0825825	0.0825169	0.0325823	0.382212	NonDEG	F7/D6	CXCR5
ENST00000257575	0.0415573	0.0396859	0.0424129	1.14924	3.97859e-05	up-regulate	F7/D6	RNFT2
ENST00000246070	0.153728	0.15568	0.148919	1.33207	1.44451e-06	up-regulate	F7/D6	LAMP5
ENST00000227507	0.0531091	0.0529892	0.0535934	-0.155338	0.00365517	NonDEG	F7/D6	CCND1
ENST00000229238	0.431703	0.393498	0.381486	-0.299835	0.0383184	NonDEG	F7/D6	MRPL51
ENST00000355897	0.272495	0.268324	0.271203	-0.387176	4.15142e-05	NonDEG	F7/D6	GPR160
ENST00000378024	0.0952768	0.0958731	0.0810823	-0.0616216	0.549933	NonDEG	F7/D6	AHNAK
ENST00000336735	0.652801	0.617946	0.67628	-0.261635	0.114598	NonDEG	F7/D6	SEL1L
ENST00000321870	0.00190722	0.00201957	0.00201415	-0.914028	9.97784e-05	NonDEG	F7/D6	BHLHE22
ENST00000339992	0.0465642	0.0440385	0.0460805	0.347553	0.000443931	NonDEG	F7/D6	HMX2
ENST00000216115	0.035783	0.0323224	0.0337683	-1.08006	6.93776e-06	down-regulate	F7/D6	BIK
ENST00000361624	208.419	182.193	196.037	0.372041	0.00509063	NonDEG	F7/D6	MT-CO1
ENST00000368468	0.748083	0.750635	0.761148	-0.159069	0.00196837	NonDEG	F7/D6	MAN1A1
ENST00000552695	0.16971	0.162192	0.166254	0.444007	0.000152521	NonDEG	F7/D6	FICD
ENST00000349499	0.628595	0.619213	0.652496	0.907332	1.03127e-05	NonDEG	F7/D6	CLIC6
ENST00000357878	0.169299	0.213306	0.206135	0.524993	0.0142103	NonDEG	F7/D6	HMX3
ENST00000261837	0.0207113	0.0220094	0.0229794	0.751919	0.000393112	NonDEG	F7/D6	GNB5
ENST00000341184	0.0776508	0.0761903	0.0726919	-1.24969	1.49961e-06	down-regulate	F7/D6	MGAT3
ENST00000276914	0.149094	0.150864	0.167613	-0.982038	2.19595e-05	NonDEG	F7/D6	PLIN2
ENST00000313683	0.000361679	0.000333565	0.000381862	-5.18044	0.00362396	down-regulate	F7/D6	PNMA8A
ENST00000299572		0.0233529	0.0196122	0.0689513	0.686114	NonDEG	F7/D6	CENPN
ENST00000334512	0.0389774	0.0371214	0.0406027	0.517121	0.000381536	NonDEG	F7/D6	ZMIZ1
ENST00000376759	0.0615911	0.0740439	0.0686046	0.216839	0.0754853	NonDEG	F7/D6	RBM3
ENST00000264433	0.0966307	0.0859212	0.0893117	-0.557109	0.00240541	NonDEG	F7/D6	FNIP2
ENST00000254799	0.0340046	0.0338082	0.0324856	0.197554	0.00469836	NonDEG	F7/D6	GRSF1
ENST00000588361	0.0287613	0.0284308	0.0300151	0.554292	0.00663417	NonDEG	F7/D6	KDM4B
ENST00000322128	0.0277309	0.0284359	0.0209346	-1.29898	0.00026438	down-regulate	F7/D6	TSPYL5
ENST00000377507	0.0165601	0.0163515	0.0159467	-2.38231	0.000326964	down-regulate	D5/D6	TNFRSF9
ENST00000005260	0.0700358	0.0690776	0.0681592	0.344755	4.25529e-05	NonDEG	D5/D6	BAIAP2L1
ENST00000357878	0.0871788	0.10027	0.103034	1.19077	0.000428349	up-regulate	D5/D6	HMX3
ENST00000335661	0.312704	0.320839	0.315854	0.115237	0.00687946	NonDEG	D5/D6	BCL2A1
ENST00000321870	0.00012041	0.000119303	0.000117439	-2.64627	0.0418674	down-regulate	D5/D6	BHLHE22
ENST00000256447	0.0629414	0.0581654	0.0603909	-2.01211	5.59178e-07	down-regulate	D5/D6	CD180
ENST00000329759	0.151111	0.139762	0.148527	0.941982	3.66469e-05	NonDEG	D5/D6	FAM43A
ENST00000255695	0.0113253	0.0111989	0.0105877	1.10702	1.49282e-05	up-regulate	D5/D6	PLAAT2
ENST00000313104	0.556344	0.586124	0.580308	1.3078	0.000629079	up-regulate	D5/D6	RPLPO
ENST00000455959	0.0434336	0.0382621	0.0411647	0.370851	0.00682943	NonDEG	D5/D6	SEC11A
ENST00000367495	0.008052	0.00716917	0.00711084	-1.19159	0.000159457	down-regulate	D5/D6	RAB32
ENST00000379287	0.274958		0.280413	0.609745	0.00240112	NonDEG	D5/D6	GFOD1
ENST00000370078	0.103948	0.124635	0.123926	0.480754	0.00934031	NonDEG	D5/D6	PRM76
ENST00000427159	0.215859		0.185054	0.347369	0.115866	NonDEG	D5/D6	FTSJ3
ENST00000380752	0.199516	0.227395	0.245952	0.175351	0.216328	NonDEG	D5/D6	SLC7A1
ENST00000311177	0.0540291	0.0484234	0.0517029	0.616475	0.00594275	NonDEG	D5/D6	HOXB9
ENST00000381077	0.160024	0.143607	0.133985	-0.49436	0.0421737	NonDEG	D5/D6	PUDP
ENSG00000021355	0.107304	0.131141	0.111623	-1.02165	0.00536483	down-regulate	D5/D6	SERPINB1
ENST00000314133	0.799505	0.757712	0.82123	-0.263112	0.0231698	NonDEG	D5/D6	COX8A
ENST00000241261	0.0841474	0.0831205	0.0848023	-1.54495	0.000906517	down-regulate	D5/D6	TNFSF10
ENST00000407280	3.75295	3.58748	3.44398	-0.177634	0.0549896	NonDEG	D5/D6	IFI30
ENST00000367029	0.122041	0.121119	0.128531	-3.34367	0.00102147	down-regulate	D5/D6	G0S2
ENST00000291232	1.87317	1.59802	1.47148	0.0231835	0.839793	NonDEG	D5/D6	TNFRSF13C
ENST00000266557	0.662984	0.751441	0.63649	-0.253413	0.0371608	NonDEG	D5/D6	CD27
ENST00000248958	0.0724322		0.077067	-0.841076	0.00033905	NonDEG	D5/D6	SDF2L1
ENST00000341184	0.0824415	0.0784339	0.0841558	-0.146631	0.00757151	NonDEG	D5/D6	MGAT3
ENST00000257527	0.0233813	0.0190202	0.0185756	-0.649471	0.002079	NonDEG	D5/D6	ADAM19
ENST00000569669	0.182193	0.160686	0.163588	0.583109	0.0020265	NonDEG	D5/D6	BOP1
ENST00000005257	0.0350372	0.0387958	0.0402521	-0.55379	0.0190818	NonDEG	D5/D6	RALA
ENST00000361314	0.0210821	0.0192648	0.0196843	-0.4297	0.000381277	NonDEG	D5/D6	GPX7
ENST00000327535	0.0383045	0.0427505	0.0384633	0.316907	0.0115245	NonDEG	D5/D6	IFNLR1
ENST00000367511	0.41402	0.355274	0.30643	-0.618838	0.00601709	NonDEG	D5/D6	NIBAN1
ENST00000552695	0.0568323	0.0491062	0.0509253	-0.743368	0.0247339	NonDEG	D5/D6	FICD
ENST00000261837	0.022551	0.02352	0.0250083	0.00307944	0.974033	NonDEG	D5/D6	GNB5
ENST00000275072	0.12779	0.145166	0.121546	1.05	0.00139137	up-regulate	D5/D6	PM20D2
ENST00000302754	0.511178	0.504999	0.523975	-0.934775	0.00515979	NonDEG	D5/D6	JUNB
ENST00000313401	0.6711	0.566605	0.471316	1.2442	0.026911	up-regulate	D5/D6	CDK5R1
ENST00000302165		2.99051e-05	3.38342e-05	1.64811	0.00147443	up-regulate	D5/D6	IRF2BP1
ENST00000597705	0.0262581	0.0255927	0.0242348	1.13129	2.23864e-05	up-regulate	D5/D6	C19orf48P
ENST00000380861	0.0198359	0.0201658	0.019846	-2.142	0.000765527	down-regulate	D5/D6	WWC3
ENST00000372733	0.0190319	0.0176339	0.0198	-0.942833	1.13752e-05	NonDEG	D5/D6	SDC4
ENST00000390556	0.108252	0.102329	0.106536	-2.96208	0.0105473	down-regulate	D5/D6	IGHD
ENST00000417314	0.0631894	0.0509444	0.0650166	0.599334	0.0120994	NonDEG	D5/D6	KBTBD8
ENST00000310597		0.051123	0.0439349	-0.000521269	0.996964	NonDEG	D5/D6	ZNHIT2
ENST00000336735	0.304359	0.34861	0.368448	-0.708787	0.000707363	NonDEG	D5/D6	SEL1L
ENST00000557434	0.03548	0.0336908	0.0302648	0.0958286	0.363855	NonDEG	D5/D6	LGMN
ENST00000332503	0.202999	0.240139	0.186022	0.815454	0.00521658	NonDEG	D5/D6	HOBX4
ENST00000247225	0.526939	0.509429	0.611991	0.799713	0.00197838	NonDEG	D5/D6	SGPP1
ENST00000381938	0.277832	0.212907	0.231155	0.428631	0.0354354	NonDEG	D5/D6	TMEM156
ENST00000261867	0.00440914	0.00527943	0.00495869	-1.41196	1.79703e-05	down-regulate	D5/D6	SLC30A4
ENST00000379607	0.135215	0.127259	0.137438	0.396923	0.000952417	NonDEG	D5/D6	EIF2AX
ENST00000382247	0.0669432	0.0820527	0.0722504	0.293895	0.10001	NonDEG	D5/D6	DCAF16
ENST00000392456	0.789038	0.985462	0.861278	-0.498429	0.00661229	NonDEG	D5/D6	CCDC50
ENST00000223273	0.0622449	0.0510198	0.0604612	-0.0772452	0.521672	NonDEG	D5/D6	YAE1
ENST00000294507	8.57366	7.97883	7.50113	-0.398798	0.00269854	NonDEG	D5/D6	LAPTM5
ENST00000269397	0.16783	0.157127	0.12895	0.320334	0.143623	NonDEG	D5/D6	CBX4
ENST00000447079	0.0988797	0.0982688	0.0995898	0.29698	0.0012466	NonDEG	D5/D6	CDK12
ENST00000220507	0.0457565	0.0494706	0.0475596	-0.759172	2.8169e-05	NonDEG	D5/D6	RHOV
ENST00000291906	0.0432472	0.0396681	0.0388565	0.109841	0.116217	NonDEG	D5/D6	PKN3
ENST00000260197	0.872481	0.848204	0.763492	0.235485	0.0212149	NonDEG	D5/D6	SDRL1
ENST00000238508	0.205942	0.171425	0.230906	0.322819	0.0920772	NonDEG	D5/D6	SERPINB10
ENST00000349499	0.370498	0.46311	0.35015	1.32895	0.0135051	up-regulate	D5/D6	CLIC6
ENST00000327355	0.0554022	0.0557927	0.0595172	-0.016142	0.813314	NonDEG	D5/D6	FAM174B
ENST00000302277	0.0111172	0.0116339	0.0114441	1.0184	1.47755e-05	up-regulate	D5/D6	ZNF804A
ENST00000250916	0.0990914		0.0996786	0.556941	0.0454605	NonDEG	D5/D6	KLF16
ENST00000318528	0.013014	0.0115337	0.0119472	-1.27851	6.31701e-05	down-regulate	D5/D6	ERICH5
ENST00000227451	0.460633	0.434102	0.438602	1.11768	1.39296e-05	up-regulate	D5/D6	DTX4
ENST00000355085	0.0305889	0.0304815	0.02975	1.17874	1.25922e-05	up-regulate	D5/D6	C5AR1
ENST00000264538	0.0409509	0.0396602	0.0401191	-0.380439	0.000137577	NonDEG	D5/D6	IFT57
ENST00000274026	0.0211508	0.0213727	0.021304	-0.556951	0.00469377	NonDEG	D5/D6	CCNA2
ENST00000361453	47.75	45.4871	44.5565	0.427303	0.000874134	NonDEG	D5/D6	MT-ND2
ENST00000312184	0.0323785	0.0328877	0.034422	0.297778	0.000669168	NonDEG	D5/D6	TMEM70
ENST00000284311	1.04305	1.05203	1.04229	-0.343396	0.0100458	NonDEG	D5/D6	GPR15
ENST00000381401	1.39643	1.44306	1.47557	0.286424	0.00625413	NonDEG	D5/D6	SLC25A6
ENST00000370141	0.179785	0.16709	0.164998	0.259302	0.00618195	NonDEG	D5/D6	TRMT13
ENST00000357164	0.987935	0.963929	0.987839	0.305379	0.000318995	NonDEG	D5/D6	GM2A
ENST00000228438	0.00249073	0.00270821	0.00281775	-2.0785	0.000422773	down-regulate	D5/D6	CLEC2B
ENST00000369448	0.0261458	0.0263523	0.0262413	-1.43528	0.000145329	down-regulate	D5/D6	TENT5C
ENST00000393067	2.63794	2.69867	2.53699	-0.0693422	0.102199	NonDEG	D5/D6	POU2AF1
ENST00000379638	0.249969		0.243886	0.288686	0.000942116	NonDEG	D5/D6	REEP5
ENST00000299977	0.285282	0.259435	0.271581	-0.244888	0.00874506	NonDEG	D5/D6	SLFN5
ENST00000319332	0.0141847	0.0159263	0.0174163	-1.44506	5.76348e-05	down-regulate	D5/D6	P3H2
ENST00000291750	0.107935	0.113864	0.114862	0.038405	0.305187	NonDEG	D5/D6	ZNF626
ENST00000266646	0.000113066	0.000108368	0.000135445	-0.860041	0.00292943	NonDEG	D5/D6	INHBE
ENST00000372715	0.077379	0.0801127	0.0727988	0.3399	0.00173265	NonDEG	D5/D6	DYNC2I2
ENST00000264233	0.00778951	0.00831913	0.00799093	-0.45125	0.000853486	NonDEG	D5/D6	POLQ
ENST00000374279	0.8583	0.810473	0.85924	0.69971	0.000121013	NonDEG	D5/D6	UGCG
ENST00000296658	0.00359171	0.00354592	0.00362946	-0.241561	0.000103058	NonDEG	D5/D6	CMBL
ENST00000304661	0.0415891	0.0473687	0.0471519	-0.355547	0.0184408	NonDEG	D5/D6	C1GALT1C1
ENST00000262352	0.0440677	0.0433873	0.0455384	-1.53901	5.8145e-07	down-regulate	D5/D6	SLC1A1
ENST00000355653	0.135492	0.134831	0.135357	0.495636	0.000864065	NonDEG	D5/D6	VAT1
ENST00000539680	0.0396276	0.0412377	0.0403719	0.567262	0.00011332	NonDEG	D5/D6	ECHDC2
ENST00000647941	0.251974	0.237404	0.24049	0.25225	0.00191771	NonDEG	D5/D6	CPOX
ENST00000199448	0.0096941	0.00937878	0.00932246	0.000324095	0.998622	NonDEG	D5/D6	EPDR1
ENST00000269385	0.0802678	0.077439	0.078063	1.20383	3.03915e-06	up-regulate	D5/D6	CBX8
ENST00000246115	0.0374421	0.0376488	0.0356378	-0.586979	0.000117332	NonDEG	D5/D6	S1PR4
ENST00000376215	0.162289	0.160365	0.158801	0.728208	8.89534e-06	NonDEG	D5/D6	PDSS1
ENST00000254998	0.153421	0.149166	0.144181	0.368904	0.000317333	NonDEG	D5/D6	NXT1
ENST00000237853	0.406142	0.407768	0.415213	-1.33607	2.04728e-06	down-regulate	D5/D6	ELL2
ENST00000292174	0.0136107	0.0131542	0.012787	-2.63351	1.02522e-05	down-regulate	D5/D6	CXCR5
ENST00000257575	0.0319736	0.0334585	0.0335223	0.82774	0.000119207	NonDEG	D5/D6	RNFT2
ENST00000246070	0.0149025	0.0154378	0.0142865	-2.02833	8.06025e-08	down-regulate	D5/D6	LAMP5
ENST00000227507	0.0180313	0.0194594	0.0571353	-0.910319	0.161865	NonDEG	D5/D6	CCND1
ENST00000229238	0.523681	0.451216	0.455991	-0.0539763	0.634313	NonDEG	D5/D6	MRPL51
ENST00000355897	0.448795	0.442712	0.42867	0.313965	0.000286764	NonDEG	D5/D6	GPR160
ENST00000378024	0.175982	0.192211	0.196047	0.98985	0.000200015	NonDEG	D5/D6	AHNAK
ENST00000312960	0.347022	0.329709	0.353618	0.892309	0.000139556	NonDEG	D5/D6	SIAH2
ENST00000243347	7.59681e-05	0.000104412	9.62435e-05	-2.25239	1.59556e-05	down-regulate	D5/D6	TNFAIP6
ENST00000368468	0.230032	0.235526	0.232638	-0.454487	0.412371	NonDEG	D5/D6	MAN1A1
ENST00000339992	0.127621	0.120763	0.122944	1.78941	1.87641e-06	up-regulate	D5/D6	HMX2
ENST00000216115	0.117726	0.111664	0.100783	0.616382	0.0147967	NonDEG	D5/D6	BIK
ENST00000361624	232.223	180.812		0.450769	0.273931	NonDEG	D5/D6	MT-CO1
ENST00000276914	0.200178	0.201101	0.213987	-0.586012	4.60654e-05	NonDEG	D5/D6	PLIN2
ENST00000313683	0.00726904	0.00680293	0.00674483	-0.907922	0.00148189	NonDEG	D5/D6	PNMA8A
ENST00000299572		0.0286161	0.03002	0.517578	0.017232	NonDEG	D5/D6	CENPN
ENST00000334512	0.0478845	0.0465097	0.050082	0.825131	4.3514e-05	NonDEG	D5/D6	ZMIZ1
ENST00000376759	0.0652693	0.0652149	0.067955	0.175274	0.0168937	NonDEG	D5/D6	RBM3
ENST00000264433	0.0627354	0.0613701	0.0703408	-1.04062	0.000352506	down-regulate	D5/D6	FNIP2
ENST00000254799	0.0309163	0.0288983	0.0319774	0.0696951	0.250079	NonDEG	D5/D6	GRSF1
ENST00000588361	0.0141178	0.0149443	0.0145881	-0.444166	0.0906612	NonDEG	D5/D6	KDM4B
ENST00000322128	0.117456	0.125838	0.115109	0.917769	0.000121574	NonDEG	D5/D6	TSPYL5

## Sheet: AS event
Supplementary Data 5. The RT-qPCR reference datasets for alternative splicing events.
Event_Type	Gene_Name	Gene_Id	PSI_1	PSI_2	PSI_3	DSE classification	p_value	delta_psi	sample_pair	ID
SE	PUS3	ENSG00000110060.9	0.743189	0.750755	0.763957	non-DAS	0.00773424	-0.01744	M8/D6	ENSG00000110060;SE:11:125895789-125895907:125896330-125903170:-
SE	PEX2	ENSG00000164751.15	0.832728	0.842061		non-DAS	0.005149	-0.02639	M8/D6	ENSG00000164751;SE:8:76986296-76988307:76988338-76999990:-
SE	ZKSCAN5	ENSG00000196652.12	0.582658	0.594888	0.585063	non-DAS	0.402203	0.01152	M8/D6	ENSG00000196652;SE:7:99519909-99520169:99520304-99525813:+
SE	RHBDD2	ENSG00000005486.17	0.466873	0.473264	0.475165	non-DAS	0.00116573	0.00635	M8/D6	ENSG00000005486;SE:7:75879260-75881365:75881486-75881829:+
SE	ZC2HC1A	ENSG00000104427.13	0.211864	0.203235	0.202305	non-DAS	0.0455253	0.0183	M8/D6	ENSG00000104427;SE:8:78698513-78711990:78712106-78715221:+
SE	HMGXB4	ENSG00000100281.14	0.508437	0.521129	0.524291	up-regulate	8.02755e-05	0.0583	M8/D6	ENSG00000100281;SE:22:35263874-35263982:35264096-35264648:+
SE	PAICS	ENSG00000128050.9	0.000179526	0.00019893	0.000209766	non-DAS	0.0728914	1e-05	M8/D6	ENSG00000128050;SE:4:56441860-56446357:56446377-56446695:+
SE	ZNF146	ENSG00000167635.12	0.781137	0.783617	0.778685	non-DAS	0.000881001	0.02138	M8/D6	ENSG00000167635;SE:19:36215196-36218122:36218195-36228748:+
SE	HNRNPAB	ENSG00000197451.12	0.367458	0.373985	0.37741	up-regulate	0.000367351	0.10768	M8/D6	ENSG00000197451;SE:5:178209447-178210132:178210272-178210553:+
SE	HNRNPDL	ENSG00000152795.18	0.557912	0.568248	0.566428	non-DAS	0.387538	0.07992	M8/D6	ENSG00000152795;SE:4:82424883-82425563:82425667-82426037:-
SE	ERP29	ENSG00000089248.7	0.650193	0.66778	0.646098	down-regulate	0.000429156	-0.07455	M8/D6	ENSG00000089248;SE:12:112013609-112019756:112019894-112022150:+
SE	HLA-DQB1	ENSG00000179344.17	0.280274	0.281923	0.283144	non-DAS	0.4913	-0.14975	M8/D6	ENSG00000179344;SE:6:32660249-32660859:32660882-32661347:-
SE	ABI1	ENSG00000136754	0.352366	0.33992	0.372557	up-regulate	0.00271489	0.07131	M8/D6	ENSG00000136754;SE:10:26751783-26759062:26759235-26765218:-
SE	EED	ENSG00000074266	0.164538	0.18125	0.172499	down-regulate	0.00194893	-0.09947	M8/D6	ENSG00000074266;SE:11:86268561-86270083:86270157-86276980:+
RI	CCNT2	ENSG00000082258.13	0.612506	0.580766	0.616884	non-DAS	0.678839	-0.01635	M8/D6	ENSG00000082258;RI:2:134953230:134954379-134954481:134959342:+
RI	DZIP3	ENSG00000198919.13	0.232544	0.25066	0.275858	non-DAS	0.0082107	0.0298	M8/D6	ENSG00000198919;RI:3:108647943:108648112-108648918:108648962:+ M8/D6
RI	TMEM250	ENSG00000238227.8	0.944851	0.94688	0.945182	non-DAS	0.000413223	0.02049	M8/D6	ENSG00000238227;RI:9:136114589:136114950-136115456:136117024:-
RI	MARCHF6	ENSG00000145495.16	0.550469	0.576174	0.508451	non-DAS	0.23799	0.02035	M8/D6	ENSG00000145495;RI:5:10400784:10400842-10402059:10402139:+
RI	ARGLU1	ENSG00000134884.15	0.853661	0.845124	0.867286	non-DAS	0.565097	0.05228	M8/D6	ENSG00000134884;RI:13:106557048:106557131-106559432:106559657:-
MX	CALU	ENSG00000128595	0.731875	0.706739	0.749483	non-DAS	0.00164094	-0.04387	M8/D6	ENSG00000128595;MX:7:128748804-128754262:128754455-128758871:128748804-128754529:128754722-128758871:+
A3SS	WSB1	ENSG00000109046.15	0.816117	0.788286	0.806209	up-regulate	0.0498196	0.06625	M8/D6	ENSG00000109046;A3:17:27306882-27307744:27306882-27309100:+
A3SS	BOLA2-SMG1P6	ENSG00000261740	0.413603	0.421661	0.459433	up-regulate	0.0149342	0.1946	M8/D6	ENSG00000261740;A3:16:29447026-29454016:29446922-29454016:-
A5SS	H2AC6	ENSG00000180573.10	0.0605173	0.0613874	0.0625487	non-DAS	0.010238	-0.01299	M8/D6	ENSG00000180573;A5:6:26124749-26138054:26124633-26138054:+
A5SS	BUD31	ENSG00000106245.11	0.188429	0.193228	0.229252	non-DAS	0.000368442	0.04246	M8/D6	ENSG00000106245;A5:7:99409245-99410034:99409004-99410034:+
AL	BCCIP	ENSG00000107949.17	0.708248	0.691341	0.685576	non-DAS	0.300733	0.01686	M8/D6	ENSG00000107949;AL:10:125833946-125836104:125836551:125833946-125841255:125842805:+
AL	ZNF880	ENSG00000221923.9	0.721021	0.707421	0.737038	up-regulate	5.9944e-06	0.3677	M8/D6	ENSG00000221923;AL:19:52374427-52379421:52380075:52374427-52383849:52385795:+
SE	HSF2	ENSG00000025156.13	0.485854	0.500821	0.470452	non-DAS	0.133181	-0.10872	M8/D6	ENSG00000025156;SE:6:122423686-122427903:122427956-122431430:+
SE	IVNS1ABP	ENSG00000116679.16	0.463442	0.463499	0.455893	non-DAS	0.0210633	0.03204	M8/D6	ENSG00000116679;SE:1:185305643-185306485:185306625-185307014:-
SE	RIPK2	ENSG00000104312.8	0.728554	0.71875	0.733761	non-DAS	0.000336941	0.03395	M8/D6	ENSG00000104312;SE:8:89758233-89762829:89762982-89765341:+
SE	IFT46	ENSG00000118096.10	0.106187	0.100857	0.114857	non-DAS	0.0860958	-0.00694	M8/D6	ENSG00000118096;SE:11:118557045-118557738:118557890-118559785:-
MX	PRR3	ENSG00000204576.12	0.283704	0.275938	0.284284	down-regulate	0.000271844	-0.06455	M8/D6	ENSG00000204576;MX:6:30557450-30558150:30558212-30561834:30557450-30561328:30561508-30561834:+
MX	RAB28	ENSG00000157869.16	0.819126	0.786967	0.794087	non-DAS	0.965664	0.01486	M8/D6	ENSG00000157869;MX:4:13368650-13369871:13369965-13376545:13368650-13371795:13371867-13376545:-
A3SS	ALKBH2	ENSG00000189046.11	0.846733	0.849906	0.839204	non-DAS	0.00754913	0.00369	M8/D6	ENSG00000189046;A3:12:109092937-109093247:109092787-109093247:-
A5SS	MTFR2	ENSG00000146410.12	0.330384	0.386574	0.379314	up-regulate	0.0127672	0.05334	M8/D6	ENSG00000146410;A5:6:136249153-136249976:136249153-136250264:-
A5SS	HBP1	ENSG00000105856.14	0.433134	0.48072	0.530013	non-DAS	0.677384	0.06115	M8/D6	ENSG00000105856;A5:7:107169185-107179879:107169027-107179879:+
AF	TFEB	ENSG00000112486.18	0.942433	0.927406	0.933054	non-DAS	0.0351524	-0.00113	M8/D6	ENSG00000112561;AF:6:41691235-41705647:41705940:41691235-41723461:41723726:-
AF	IDH1	ENSG00000138413.14	0.376819	0.420236	0.385902	non-DAS	9.57157e-06	-0.00524	M8/D6	ENSG00000138413;AF:2:208253959-208254031:208254322:208253959-208254343:208254458:-
AF	EIF5A	ENSG00000132507.18	0.62649	0.650697	0.630975	non-DAS	0.128804	0.04942	M8/D6	ENSG00000132507;AF:17:7306999:7307115-7309615:7308371:7308575-7309615:+
AL	ZFP41	ENSG00000181638.20	0.0777236	0.0713574	0.0831485	non-DAS	0.0294448	0.02311	M8/D6	ENSG00000181638;A5:8:143247749-143249690:143247142-143249690:+
AL	ARMC7	ENSG00000125449.7	0.236558	0.259117	0.24568	non-DAS	0.00775368	-0.00555	M8/D6	ENSG00000125449;AL:17:75110606-75114169:75114826:75110606-75128677:75130272:+
A5SS	XRCC4	ENSG00000152422.16	0.0111826	0.0119166	0.0108193	non-DAS	0.045165	0.00043	M8/D6	ENSG00000152422;A5:5:83077662-83104910:83077615-83104910:+
SE	IKBIP	ENSG00000166130.15	0.644003	0.652475	0.620876	down-regulate	0.00401775	-0.08049	M8/D6	ENSG00000166130;SE:12:98614340-98634296:98634413-98644523:-
SE	C1orf43	ENSG00000143612.21	0.299618	0.319557	0.280971	non-DAS	0.0876071	-0.08355	M8/D6	ENSG00000143612;SE:1:154214574-154219836:154219937-154220342:-
SE	FCGR2B	ENSG00000072694.22	0.931619	0.940214	0.928642	up-regulate	0.000915662	0.08213	M8/D6	ENSG00000072694;SE:1:161674073-161675257:161675313-161677328:+
SE	CIAO2A	ENSG00000166797.11	0.359838	0.299129	0.326523	non-DAS	0.437	-0.04268	M8/D6	ENSG00000166797;SE:15:64075537-64081102:64081151-64088687:-
SE	THEM4	ENSG00000159445.13	0.411942	0.441051	0.41961	non-DAS	0.00316955	0.00061	M8/D6	ENSG00000159445;SE:1:151889373-151889983:151890214-151895008:-
SE	ZNF35	ENSG00000169981.11	0.481921	0.463545	0.443425	non-DAS	0.190885	-0.02317	M8/D6	ENSG00000169981;SE:3:44651259-44652557:44652701-44658701:+
AF	SNAPC2	ENSG00000104976.13	0.253073	0.0978421	0.0726538	down-regulate	0.0401111	-0.32555	M8/D6	ENSG00000104976;AF:19:7920338:7920549-7921423:7921015:7921119-7921423:+
AF	FBXO5	ENSG00000112029.10	0.778386		0.786652	up-regulate	1.15557e-06	0.31247	M8/D6	ENSG00000112029;AF:6:152975621-152982857:152983041:152975621-152983234:152983579:-
AL	TPGS2	ENSG00000134779.15	0.000210213	0.000182879		non-DAS	0.126077	-0.00023	M8/D6	ENSG00000134779;AL:18:36777647:36780188-36798449:36786573:36787079-36798449:-
SE	TMEM263	ENSG00000151135.10		0.00193771	0.0022721	non-DAS	0.0278468	-0.00443	M8/D6	ENSG00000151135;SE:12:106956065-106957082:106957149-106967111:+
A3SS	OAS1	ENSG00000089127.15	0.762363	0.683758	0.736734	up-regulate	0.00585072	0.59732	M8/D6	ENSG00000089127;A3:12:112917700-112918597:112917700-112919389:+
SE	EIF4H	ENSG00000106682.16	0.0948277	0.100382	0.0954445	up-regulate	0.00264653	0.05287	M8/D6	ENSG00000106682;SE:7:74189918-74190247:74190306-74194741:+
SE	CD200	ENSG00000091972.18	0.129363	0.133846	0.147222	non-DAS	0.000202454	-0.04016	M8/D6	ENSG00000091972;A3:3:112345288-112347558:112345288-112347563:+
SE	C1orf52	ENSG00000162642.14	0.555691	0.568795	0.566914	non-DAS	0.00308741	-0.01487	M8/D6	ENSG00000162642;SE:1:85258722-85258935:85259061-85259358:-
SE	FZD3	ENSG00000104290.11	0.264712	0.24565	0.28302	down-regulate	0.00072624	-0.13028	M8/D6	ENSG00000104290;SE:8:28494343-28499933:28499978-28502670:+
MX	COA1	ENSG00000106603.20		0.282626	0.399792	non-DAS	0.120955	0.03634	M8/D6	ENSG00000106603;MX:7:43648652-43650493:43650712-43729429:43648652-43665658:43665722-43729429:-
A3SS	OSR2	ENSG00000164920.10		0.262476	0.270931	non-DAS	0.0978484	0.0023	M8/D6	ENSG00000164920;A3:8:98950755-98951519:98950755-98951601:+
SE	PUS3	ENSG00000110060.9	0.680963	0.73011	0.721547	down-regulate	0.0420187	-0.0592	F7/D6	ENSG00000110060;SE:11:125895789-125895907:125896330-125903170:-
SE	PEX2	ENSG00000164751.15	0.864003	0.866483	0.849677	non-DAS	0.678441	-0.00373	F7/D6	ENSG00000164751;SE:8:76986296-76988307:76988338-76999990:-
SE	ZKSCAN5	ENSG00000196652.12	0.548011	0.549238	0.549365	non-DAS	0.0115364	-0.02714	F7/D6	ENSG00000196652;SE:7:99519909-99520169:99520304-99525813:+
SE	RHBDD2	ENSG00000005486.17	0.482103	0.486073	0.470982	non-DAS	0.00327278	0.0143	F7/D6	ENSG00000005486;SE:7:75879260-75881365:75881486-75881829:+
SE	ZC2HC1A	ENSG00000104427.13	0.22008	0.210631	0.204887	non-DAS	0.279697	0.02436	F7/D6	ENSG00000104427;SE:8:78698513-78711990:78712106-78715221:+
SE	HMGXB4	ENSG00000100281.14	0.529727	0.511646	0.517718	up-regulate	0.000883314	0.06004	F7/D6	ENSG00000100281;SE:22:35263874-35263982:35264096-35264648:+
SE	ZNF146	ENSG00000167635.12	0.720999	0.703601	0.695012	down-regulate	0.00671195	-0.05323	F7/D6	ENSG00000167635;SE:19:36215196-36218122:36218195-36228748:+
SE	HNRNPAB	ENSG00000197451.12	0.317423	0.299687	0.313492	non-DAS	0.00807211	0.04493	F7/D6	ENSG00000197451;SE:5:178209447-178210132:178210272-178210553:+
SE	HNRNPDL	ENSG00000152795.18	0.490416	0.511152	0.509226	non-DAS	0.00451011	0.01932	F7/D6	ENSG00000152795;SE:4:82424883-82425563:82425667-82426037:-
SE	ERP29	ENSG00000089248.7	0.691394	0.672605	0.678468	non-DAS	0.000802994	-0.04842	F7/D6	ENSG00000089248;SE:12:112013609-112019756:112019894-112022150:+
SE	HLA-DQB1	ENSG00000179344.17		0.212724	0.26353	down-regulate	0.000283369	-0.32879	F7/D6	ENSG00000179344;SE:6:32660249-32660859:32660882-32661347:-
SE	ABI1	ENSG00000136754	0.286048	0.262565	0.262982	non-DAS	0.0444455	-0.01311	F7/D6	ENSG00000136754;SE:10:26751783-26759062:26759235-26765218:-
SE	EED	ENSG00000074266	0.235475	0.2016	0.196242	down-regulate	0.00159515	-0.06112	F7/D6	ENSG00000074266;SE:11:86268561-86270083:86270157-86276980:+
RI	CCNT2	ENSG00000082258.13	0.648867	0.664853	0.657558	non-DAS	0.352996	0.03735	F7/D6	ENSG00000082258;RI:2:134953230:134954379-134954481:134959342:+
RI	DZIP3	ENSG00000198919.13	0.266043	0.277343	0.249328	non-DAS	0.0107818	0.04102	F7/D6	ENSG00000198919;RI:3:108647943:108648112-108648918:108648962:+ M8/D6
RI	TMEM250	ENSG00000238227.8	0.929704	0.919292	0.924987	non-DAS	0.231126	-0.00049	F7/D6	ENSG00000238227;RI:9:136114589:136114950-136115456:136117024:-
RI	MARCHF6	ENSG00000145495.16	0.590453		0.550946	non-DAS	0.356349	0.04602	F7/D6	ENSG00000145495;RI:5:10400784:10400842-10402059:10402139:+
RI	ARGLU1	ENSG00000134884.15	0.822258	0.84402	0.856384	non-DAS	0.492251	0.03781	F7/D6	ENSG00000134884;RI:13:106557048:106557131-106559432:106559657:-
MX	CALU	ENSG00000128595	0.816222	0.744393	0.748267	down-regulate	0.0197185	-0.12786	F7/D6	ENSG00000128595;MX:7:128748804-128754262:128754455-128758871:128748804-128754529:128754722-128758871:+
A3SS	WSB1	ENSG00000109046.15	0.817131	0.856991		non-DAS	0.189495	0.09978	F7/D6	ENSG00000109046;A3:17:27306882-27307744:27306882-27309100:+
A3SS	BOLA2-SMG1P6	ENSG00000261740	0.351061	0.319235	0.356608	non-DAS	0.901584	0.10533	F7/D6	ENSG00000261740;A3:16:29447026-29454016:29446922-29454016:-
A5SS	H2AC6	ENSG00000180573.10	0.0548358	0.0525312	0.0420001	non-DAS	0.00236084	-0.02469	F7/D6	ENSG00000180573;A5:6:26124749-26138054:26124633-26138054:+
A5SS	BUD31	ENSG00000106245.11	0.186329	0.18904	0.210603	non-DAS	0.0106497	0.03414	F7/D6	ENSG00000106245;A5:7:99409245-99410034:99409004-99410034:+
AL	BCCIP	ENSG00000107949.17	0.730698	0.695771	0.692926	non-DAS	0.00464734	0.02827	F7/D6	ENSG00000107949;AL:10:125833946-125836104:125836551:125833946-125841255:125842805:+
AL	ZNF880	ENSG00000221923.9	0.324119	0.335879	0.306928	non-DAS	3.12462e-05	-0.03182	F7/D6	ENSG00000221923;AL:19:52374427-52379421:52380075:52374427-52383849:52385795:+
SE	HSF2	ENSG00000025156.13	0.593206	0.589348	0.568014	non-DAS	0.0122983	-0.01091	F7/D6	ENSG00000025156;SE:6:122423686-122427903:122427956-122431430:+
SE	IVNS1ABP	ENSG00000116679.16	0.400168	0.413382	0.389859	non-DAS	0.00771111	-0.02777	F7/D6	ENSG00000116679;SE:1:185305643-185306485:185306625-185307014:-
SE	RIPK2	ENSG00000104312.8	0.667058	0.675622	0.669636	non-DAS	0.00248126	-0.0223	F7/D6	ENSG00000104312;SE:8:89758233-89762829:89762982-89765341:+
SE	IFT46	ENSG00000118096.10	0.134983	0.135734	0.138858	non-DAS	0.80336	0.02229	F7/D6	ENSG00000118096;SE:11:118557045-118557738:118557890-118559785:-
MX	PRR3	ENSG00000204576.12	0.347768	0.339082	0.338972	non-DAS	0.491905	-0.00392	F7/D6	ENSG00000204576;MX:6:30557450-30558150:30558212-30561834:30557450-30561328:30561508-30561834:+
MX	RAB28	ENSG00000157869.16	0.808643	0.766734	0.812904	non-DAS	0.00602576	0.0109	F7/D6	ENSG00000157869;MX:4:13368650-13369871:13369965-13376545:13368650-13371795:13371867-13376545:-
MX	COA1	ENSG00000106603.20	0.309489	0.366446	0.381895	non-DAS	0.818138	-0.03018	F7/D6	ENSG00000106603;MX:7:43648652-43650493:43650712-43729429:43648652-43665658:43665722-43729429:-
A3SS	OSR2	ENSG00000164920.10	0.396319	0.416513	0.348329	non-DAS	0.474733	0.04593	F7/D6	ENSG00000164920;A3:8:98950755-98951519:98950755-98951601:+
A3SS	ALKBH2	ENSG00000189046.11	0.814239	0.849733	0.836133	non-DAS	0.315287	-0.00822	F7/D6	ENSG00000189046;A3:12:109092937-109093247:109092787-109093247:-
A5SS	MTFR2	ENSG00000146410.12	0.332504	0.29396	0.317438	non-DAS	0.505903	0.00255	F7/D6	ENSG00000146410;A5:6:136249153-136249976:136249153-136250264:-
A5SS	HBP1	ENSG00000105856.14	0.413527	0.479673		non-DAS	0.515686	0.02646	F7/D6	ENSG00000105856;A5:7:107169185-107179879:107169027-107179879:+
AF	TFEB	ENSG00000112486.18	0.948282	0.935528	0.929381	non-DAS	0.00921323	0.0023	F7/D6	ENSG00000112561;AF:6:41691235-41705647:41705940:41691235-41723461:41723726:-
AF	IDH1	ENSG00000138413.14	0.451023	0.446062	0.448647	non-DAS	2.85101e-05	0.04901	F7/D6	ENSG00000138413;AF:2:208253959-208254031:208254322:208253959-208254343:208254458:-
AF	EIF5A	ENSG00000132507.18	0.588789	0.552865	0.556414	non-DAS	0.0012726	-0.02061	F7/D6	ENSG00000132507;AF:17:7306999:7307115-7309615:7308371:7308575-7309615:+
AL	ZFP41	ENSG00000181638.20	0.054327	0.0484393	0.0545361	non-DAS	0.170521	-0.00186	F7/D6	ENSG00000181638;A5:8:143247749-143249690:143247142-143249690:+
AL	ARMC7	ENSG00000125449.7	0.388344	0.361735	0.384823	non-DAS	0.309177	0.12564	F7/D6	ENSG00000125449;AL:17:75110606-75114169:75114826:75110606-75128677:75130272:+
AL	TPGS2	ENSG00000134779.15	0.00582871	0.00609633	0.00646576	non-DAS	1.85092e-05	0.00507	F7/D6	ENSG00000134779;AL:18:36777647:36780188-36798449:36786573:36787079-36798449:-
A5SS	XRCC4	ENSG00000152422.16	0.00940336	0.0089288	0.00893653	non-DAS	0.0122191	-0.00179	F7/D6	ENSG00000152422;A5:5:83077662-83104910:83077615-83104910:+
SE	IKBIP	ENSG00000166130.15	0.66595	0.603279	0.643974	down-regulate	0.0110992	-0.08187	F7/D6	ENSG00000166130;SE:12:98614340-98634296:98634413-98644523:-
SE	C1orf43	ENSG00000143612.21	0.25477	0.264909	0.229874	down-regulate	0.0179999	-0.13375	F7/D6	ENSG00000143612;SE:1:154214574-154219836:154219937-154220342:-
SE	FCGR2B	ENSG00000072694.22	0.801524	0.810495	0.83558	non-DAS	0.145717	-0.03549	F7/D6	ENSG00000072694;SE:1:161674073-161675257:161675313-161677328:+
SE	CIAO2A	ENSG00000166797.11	0.347419	0.336181	0.369877	non-DAS	0.108899	-0.02002	F7/D6	ENSG00000166797;SE:15:64075537-64081102:64081151-64088687:-
SE	THEM4	ENSG00000159445.13	0.676263	0.662848	0.594434	up-regulate	9.19531e-06	0.22092	F7/D6	ENSG00000159445;SE:1:151889373-151889983:151890214-151895008:-
SE	ZNF35	ENSG00000169981.11	0.429099	0.454605	0.482976	non-DAS	0.206382	-0.03057	F7/D6	ENSG00000169981;SE:3:44651259-44652557:44652701-44658701:+
SE	PAICS	ENSG00000128050.9	0.000200322	0.000183958	0.000195933	non-DAS	0.00619304	5e-05	F7/D6	ENSG00000128050;SE:4:56441860-56446357:56446377-56446695:+
A3SS	OAS1	ENSG00000089127.15	0.000103459	0.000104708	7.51584e-05	down-regulate	0.00378745	-0.15575	F7/D6	ENSG00000089127;A3:12:112917700-112918597:112917700-112919389:+
SE	TMEM263	ENSG00000151135.10	0.0108457	0.00849484	0.0117126	non-DAS	0.388679	0.00381	F7/D6	ENSG00000151135;SE:12:106956065-106957082:106957149-106967111:+
AF	SNAPC2	ENSG00000104976.13	0.216296	0.440116	0.283527	non-DAS	0.0915148	-0.15342	F7/D6	ENSG00000104976;AF:19:7920338:7920549-7921423:7921015:7921119-7921423:+
AF	FBXO5	ENSG00000112029.10	0.848979	0.859259		non-DAS	0.493195	0.38407	F7/D6	ENSG00000112029;AF:6:152975621-152982857:152983041:152975621-152983234:152983579:-
SE	FZD3	ENSG00000104290.11	0.309174		0.293247	non-DAS	0.225383	-0.09353	F7/D6	ENSG00000104290;SE:8:28494343-28499933:28499978-28502670:+
SE	CD200	ENSG00000091972.18	0.136978	0.14324	0.157409	non-DAS	0.277381	-0.03109	F7/D6	ENSG00000091972;A3:3:112345288-112347558:112345288-112347563:+
SE	C1orf52	ENSG00000162642.14	0.729104	0.72213	0.738127	up-regulate	0.000173852	0.15112	F7/D6	ENSG00000162642;SE:1:85258722-85258935:85259061-85259358:-
SE	EIF4H	ENSG00000106682.16	0.0676874	0.0719607	0.0723623	non-DAS	8.49097e-06	0.02666	F7/D6	ENSG00000106682;SE:7:74189918-74190247:74190306-74194741:+
MX	NCF2	ENSG00000116701.16	0.126939	0.115954	0.128219	non-DAS	9.65755e-05	0.02906	F7/D6	ENSG00000116701;MX:1:183570839-183573185:183573292-183577599:183570839-183574487:183574621-183577599:-
SE	PUS3	ENSG00000110060.9	0.791435	0.786286	0.791135	non-DAS	0.365627	0.01955	D5/D6	ENSG00000110060;SE:11:125895789-125895907:125896330-125903170:-
SE	PEX2	ENSG00000164751.15	0.840466	0.836989	0.846952	non-DAS	5.23771e-05	-0.02232	D5/D6	ENSG00000164751;SE:8:76986296-76988307:76988338-76999990:-
SE	ZKSCAN5	ENSG00000196652.12	0.581553	0.595623	0.593036	non-DAS	0.166954	0.01405	D5/D6	ENSG00000196652;SE:7:99519909-99520169:99520304-99525813:+
SE	RHBDD2	ENSG00000005486.17	0.616307	0.592589	0.602466	up-regulate	0.00798668	0.13837	D5/D6	ENSG00000005486;SE:7:75879260-75881365:75881486-75881829:+
SE	ZC2HC1A	ENSG00000104427.13	0.164509	0.168711	0.165822	non-DAS	0.00116764	-0.02115	D5/D6	ENSG00000104427;SE:8:78698513-78711990:78712106-78715221:+
SE	HMGXB4	ENSG00000100281.14	0.429268	0.477234	0.470742	non-DAS	0.600728	-0.00057	D5/D6	ENSG00000100281;SE:22:35263874-35263982:35264096-35264648:+
SE	PAICS	ENSG00000128050.9	0.000141924	0.000157994	0.000151741	non-DAS	0.00503808	-4e-05	D5/D6	ENSG00000128050;SE:4:56441860-56446357:56446377-56446695:+
SE	ZNF146	ENSG00000167635.12	0.782293	0.785344	0.794402	non-DAS	0.00613553	0.02758	D5/D6	ENSG00000167635;SE:19:36215196-36218122:36218195-36228748:+
SE	HNRNPDL	ENSG00000152795.18	0.388024	0.390082	0.441205	non-DAS	0.00986342	0.04548	D5/D6	ENSG00000152795;SE:4:82424883-82425563:82425667-82426037:-
SE	ERP29	ENSG00000089248.7	0.679944	0.675571	0.657139	down-regulate	0.0227663	-0.05836	D5/D6	ENSG00000089248;SE:12:112013609-112019756:112019894-112022150:+
SE	HLA-DQB1	ENSG00000179344.17	0.551207	0.561472	0.539243	non-DAS	3.89174e-05	-0.01628	D5/D6	ENSG00000179344;SE:6:32660249-32660859:32660882-32661347:-
SE	ABI1	ENSG00000136754	0.172373	0.160933	0.158155	down-regulate	0.000518765	-0.11982	D5/D6	ENSG00000136754;SE:10:26751783-26759062:26759235-26765218:-
SE	EED	ENSG00000074266	0.240539	0.219675	0.22606	non-DAS	0.00269352	-0.04347	D5/D6	ENSG00000074266;SE:11:86268561-86270083:86270157-86276980:+
RI	CCNT2	ENSG00000082258.13	0.604184	0.642439	0.623626	non-DAS	0.157701	0.00368	D5/D6	ENSG00000082258;RI:2:134953230:134954379-134954481:134959342:+
RI	DZIP3	ENSG00000198919.13	0.2003	0.179829	0.220854	non-DAS	0.00347317	-0.02289	D5/D6	ENSG00000198919;RI:3:108647943:108648112-108648918:108648962:+ M8/D6
RI	TMEM250	ENSG00000238227.8	0.938245	0.934603	0.93495	non-DAS	0.000261896	0.01078	D5/D6	ENSG00000238227;RI:9:136114589:136114950-136115456:136117024:-
RI	MARCHF6	ENSG00000145495.16	0.372619	0.464064	0.444831	down-regulate	3.98943e-06	-0.09751	D5/D6	ENSG00000145495;RI:5:10400784:10400842-10402059:10402139:+
RI	ARGLU1	ENSG00000134884.15	0.815158	0.810969	0.810866	non-DAS	0.169427	0.00925	D5/D6	ENSG00000134884;RI:13:106557048:106557131-106559432:106559657:-
MX	CALU	ENSG00000128595	0.729621	0.740474	0.763654	non-DAS	0.0121306	-0.02865	D5/D6	ENSG00000128595;MX:7:128748804-128754262:128754455-128758871:128748804-128754529:128754722-128758871:+
A3SS	WSB1	ENSG00000109046.15	0.230429	0.1995	0.23413	down-regulate	1.98527e-05	-0.3328	D5/D6	ENSG00000109046;A3:17:27306882-27307744:27306882-27309100:+
A3SS	BOLA2-SMG1P6	ENSG00000261740	0.287312	0.295428	0.292557	non-DAS	0.228653	0.0548	D5/D6	ENSG00000261740;A3:16:29447026-29454016:29446922-29454016:-
A5SS	H2AC6	ENSG00000180573.10	0.0249972	0.0250692	0.0284422	non-DAS	6.33103e-05	-0.04831	D5/D6	ENSG00000180573;A5:6:26124749-26138054:26124633-26138054:+
A5SS	BUD31	ENSG00000106245.11	0.125202	0.120864	0.137423	non-DAS	0.000128686	-0.03335	D5/D6	ENSG00000106245;A5:7:99409245-99410034:99409004-99410034:+
AL	BCCIP	ENSG00000107949.17	0.634428	0.665869	0.629501	non-DAS	0.0616353	-0.03493	D5/D6	ENSG00000107949;AL:10:125833946-125836104:125836551:125833946-125841255:125842805:+
AL	ZNF880	ENSG00000221923.9	0.360751	0.352816	0.391253	non-DAS	0.466247	0.01414	D5/D6	ENSG00000221923;AL:19:52374427-52379421:52380075:52374427-52383849:52385795:+
SE	HSF2	ENSG00000025156.13	0.583623	0.584195	0.596992	non-DAS	0.736621	-0.00616	D5/D6	ENSG00000025156;SE:6:122423686-122427903:122427956-122431430:+
SE	IVNS1ABP	ENSG00000116679.16	0.571736	0.553702	0.574785	non-DAS	0.199413	0.13783	D5/D6	ENSG00000116679;SE:1:185305643-185306485:185306625-185307014:-
SE	RIPK2	ENSG00000104312.8	0.785565	0.827502	0.784217	up-regulate	0.0384639	0.10602	D5/D6	ENSG00000104312;SE:8:89758233-89762829:89762982-89765341:+
SE	IFT46	ENSG00000118096.10	0.0828578	0.0756533	0.102046	non-DAS	0.000835342	-0.02739	D5/D6	ENSG00000118096;SE:11:118557045-118557738:118557890-118559785:-
MX	PRR3	ENSG00000204576.12	0.29393	0.306753	0.305349	non-DAS	0.516297	-0.04385	D5/D6	ENSG00000204576;MX:6:30557450-30558150:30558212-30561834:30557450-30561328:30561508-30561834:+
MX	NCF2	ENSG00000116701.16	0.0530327	0.0557355	0.0770678	non-DAS	4.11437e-05	-0.0327	D5/D6	ENSG00000116701;MX:1:183570839-183573185:183573292-183577599:183570839-183574487:183574621-183577599:-
MX	RAB28	ENSG00000157869.16	0.701248	0.747845	0.749348	down-regulate	0.00281022	-0.05238	D5/D6	ENSG00000157869;MX:4:13368650-13369871:13369965-13376545:13368650-13371795:13371867-13376545:-
MX	COA1	ENSG00000106603.20	0.308695	0.30674	0.403712	non-DAS	0.00519287	-0.04308	D5/D6	ENSG00000106603;MX:7:43648652-43650493:43650712-43729429:43648652-43665658:43665722-43729429:-
A3SS	OSR2	ENSG00000164920.10	0.378921	0.433728	0.412197	up-regulate	0.00920789	0.06716	D5/D6	ENSG00000164920;A3:8:98950755-98951519:98950755-98951601:+
A3SS	ALKBH2	ENSG00000189046.11	0.816902	0.818812	0.842366	non-DAS	0.000750102	-0.01556	D5/D6	ENSG00000189046;A3:12:109092937-109093247:109092787-109093247:-
A5SS	MTFR2	ENSG00000146410.12	0.237635	0.283338	0.293637	non-DAS	0.0360974	-0.04055	D5/D6	ENSG00000146410;A5:6:136249153-136249976:136249153-136250264:-
A5SS	HBP1	ENSG00000105856.14	0.398168	0.363926	0.496398	non-DAS	0.0823357	-0.00065	D5/D6	ENSG00000105856;A5:7:107169185-107179879:107169027-107179879:+
AF	TFEB	ENSG00000112486.18	0.921061	0.927905	0.929864	non-DAS	0.000200326	-0.00915	D5/D6	ENSG00000112561;AF:6:41691235-41705647:41705940:41691235-41723461:41723726:-
AF	IDH1	ENSG00000138413.14	0.372753	0.397527	0.414451	non-DAS	5.41541e-06	-0.00465	D5/D6	ENSG00000138413;AF:2:208253959-208254031:208254322:208253959-208254343:208254458:-
AF	EIF5A	ENSG00000132507.18	0.457339	0.434028	0.490566	down-regulate	0.0010007	-0.12599	D5/D6	ENSG00000132507;AF:17:7306999:7307115-7309615:7308371:7308575-7309615:+
AL	ZFP41	ENSG00000181638.20	0.0648034	0.0572525	0.0643988	non-DAS	0.0120678	0.00786	D5/D6	ENSG00000181638;A5:8:143247749-143249690:143247142-143249690:+
AL	ARMC7	ENSG00000125449.7	0.255409	0.248619	0.267678	non-DAS	0.00976241	0.00457	D5/D6	ENSG00000125449;AL:17:75110606-75114169:75114826:75110606-75128677:75130272:+
A5SS	XRCC4	ENSG00000152422.16	0.00810953	0.00991919	0.0073903	non-DAS	0.0201763	-0.0024	D5/D6	ENSG00000152422;A5:5:83077662-83104910:83077615-83104910:+
SE	IKBIP	ENSG00000166130.15	0.740374	0.751926	0.767388	non-DAS	0.0592452	0.03362	D5/D6	ENSG00000166130;SE:12:98614340-98634296:98634413-98644523:-
SE	C1orf43	ENSG00000143612.21	0.358828	0.363599	0.347476	non-DAS	0.0448585	-0.02697	D5/D6	ENSG00000143612;SE:1:154214574-154219836:154219937-154220342:-
SE	FCGR2B	ENSG00000072694.22	0.886081	0.878963	0.899359	non-DAS	0.0316704	0.03678	D5/D6	ENSG00000072694;SE:1:161674073-161675257:161675313-161677328:+
SE	CIAO2A	ENSG00000166797.11	0.353338	0.397883	0.384325	non-DAS	0.0409204	0.00733	D5/D6	ENSG00000166797;SE:15:64075537-64081102:64081151-64088687:-
SE	THEM4	ENSG00000159445.13	0.358038	0.354237	0.35666	non-DAS	0.0757985	-0.06728	D5/D6	ENSG00000159445;SE:1:151889373-151889983:151890214-151895008:-
SE	ZNF35	ENSG00000169981.11	0.590008		0.541655	non-DAS	0.894138	0.0797	D5/D6	ENSG00000169981;SE:3:44651259-44652557:44652701-44658701:+
AF	SNAPC2	ENSG00000104976.13	0.649436	0.64252		up-regulate	0.0307124	0.17924	D5/D6	ENSG00000104976;AF:19:7920338:7920549-7921423:7921015:7921119-7921423:+
AF	FBXO5	ENSG00000112029.10		0.887221	0.937983	up-regulate	0.0263912	0.44256	D5/D6	ENSG00000112029;AF:6:152975621-152982857:152983041:152975621-152983234:152983579:-
AL	TPGS2	ENSG00000134779.15	0.00014681	5.08404e-05	0.000147686	non-DAS	0.0161892	-0.00032	D5/D6	ENSG00000134779;AL:18:36777647:36780188-36798449:36786573:36787079-36798449:-
SE	TMEM263	ENSG00000151135.10	0.00157963	0.00173656	0.00191422	non-DAS	0.0831532	-0.0048	D5/D6	ENSG00000151135;SE:12:106956065-106957082:106957149-106967111:+
A3SS	OAS1	ENSG00000089127.15	0.191474	0.203224	0.176599	up-regulate	0.00245241	0.06014	D5/D6	ENSG00000089127;A3:12:112917700-112918597:112917700-112919389:+
SE	EIF4H	ENSG00000106682.16	0.0242038	0.0250171	0.0272209	non-DAS	2.344e-06	-0.01853	D5/D6	ENSG00000106682;SE:7:74189918-74190247:74190306-74194741:+
SE	CD200	ENSG00000091972.18	0.15406	0.160688	0.173113	non-DAS	1.0025e-05	-0.01435	D5/D6	ENSG00000091972;A3:3:112345288-112347558:112345288-112347563:+
SE	C1orf52	ENSG00000162642.14	0.510673	0.508279	0.507465	down-regulate	2.10697e-05	-0.06987	D5/D6	ENSG00000162642;SE:1:85258722-85258935:85259061-85259358:-
SE	FZD3	ENSG00000104290.11	0.343032	0.327453	0.3693	non-DAS	0.479679	-0.04815	D5/D6	ENSG00000104290;SE:8:28494343-28499933:28499978-28502670:+
SE	HNRNPAB	ENSG00000197451.12	0.349829	0.344864	0.436059	non-DAS	0.00912878	-0.02029	D5/D6	ENSG00000197451;SE:5:178209447-178210132:178210272-178210553:+
