# Supplementary material for: Benchmarking RNA-seq with the Quartet Reference Materials to establish Best Practices for Accurate Alternative Splicing Detection
Source: Research Square preprint supplement (doi:10.21203/rs.3.rs-7716867/v1), 2025-11-05
Supplement: Supplementary file 6 [file f95e2f43fd94bb4cf9ace120.xlsx]

## Sheet: Sheet1
Supplementary Data 1. RNA-seq data quality across all 42 laboratories.
lab	Pre-alignment QC							Post-alignment QC												Sample-level QC
	Number of Reads (million)	Number of paired-end reads (million)	Q30 (%)	Q20 (%)	GC (%)	Paired-end reads length (bp)	Duplicate rate (%)	Unique mapped (%)	Unmapped (%)	Multiple mapped (%)	Total mapped (%)	Mismatch bases rate (%)	Duplicate rate (%) #	Duplicate rate in coding region (%)	5' - 3' bias	Insert size (bp)	Mapped to exonic region (%)	Mapped to intronic region (%)	Mapped to intergentic region (%)	Mpped to ERCC (‰)	Sample identity check	Gene-level SNR	Gene-level delta SNR	Isoform-level SNR	Isoform-level delta SNR	AS event-level SNR	AS event-level delta SNR
lab01	55.3±4.48	27.65±2.24	93.44±0.2	97.71±0.08	49.87±0.24	297.94±0.23	15.21±0.72	94.63±0.33	2.6±0.26	94.63±0.33	97.4±0.26	0.29±0.01	21.39±0.87	22.11±0.91	1.06±0.01	544.56±28.26	82.4±0.84	15.59±0.78	2.01±0.09	0 ± 0	PASS	33.8	0.9	29.2	1.2	15.5	1.2
lab03	199.37±29.13	99.69±14.57	91.8±0.69	96.87±0.34	49.87±1.11	293.17±0.96	18.63±1.66	84.24±1.39	3.5±0.2	84.24±1.39	96.51±0.2	0.36±0.04	26.6±1.54	21.55±0.91	1.04±0.02	251.72±5.37	44.81±1.76	50.02±1.83	5.17±0.24	0.001 ± 0	PASS	15	2.9	13.9	3.5	9.8	2.8
lab04	218.68±29.58	109.34±14.79	94.51±0.4	98.09±0.14	50.38±1.03	292.56±1.42	29.28±2.03	84.58±1.49	2.96±0.18	84.58±1.49	97.04±0.18	0.25±0.02	37.93±1.75	33.75±1.36	1.04±0.01	256.5±13.93	45.54±1.75	49.29±1.83	5.18±0.18	0.003 ± 0.001	PASS	14.4	3.6	14.1	3.6	12.1	2.1
lab05	56.35±4.43	28.18±2.21	92.88±0.28	97.45±0.14	47.35±0.07	295.67±0.58	18.92±1.06	94.79±0.16	2.32±0.13	94.79±0.16	97.68±0.13	0.35±0.02	28.72±1.22	29.05±1.26	1.16±0.02	296±11.59	80.54±0.86	17.47±0.78	2±0.08	0.002 ± 0.003	PASS	35	0.5	27.9	3.5	11.4	5
lab06	101.87±12.17	50.94±6.08	91.03±0.5	97.92±0.15	48.48±1.81	198.94±0.23	10.61±5.08	88.13±8.43	2.28±0.66	88.13±8.43	97.72±0.65	0.26±0.01	12.08±5.62	8.91±1.48	1.09±0.04	246.11±48.01	51.37±11.14	44.87±10.47	3.76±0.7	0 ± 0	PASS	3.9	20	3.6	13.4	2.6	5.8
lab07	54.59±5.57	27.29±2.79	88.53±0.74	95.31±0.4	54.16±1.91	293.22±4.35	9.65±2.19	80.91±3.15	5.44±0.89	80.91±3.15	94.57±0.89	0.59±0.05	22.87±6.4	18.84±6.66	0.98±0.03	400.11±20.22	50.51±4.84	44.04±4	5.45±1.6	0.001 ± 0	PASS	0.5	2.2	0.6	1.6	0.8	2
lab08	78.38±6.97	39.19±3.48	90.23±1.01	96.05±0.4	47.88±0.44	290.28±2.08	12.74±1.8	91.4±1.14	2.18±0.69	91.4±1.14	97.82±0.69	0.44±0.03	18.98±1.83	18.23±1.34	1.13±0.02	228.94±6.35	49.64±1.64	46.7±1.53	3.66±0.13	0.001 ± 0	PASS	31.2	1.1	26.9	0.7	13.6	0.3
lab09	50.88±6.16	25.44±3.08	95.58±0.21	98.48±0.12	51.07±0.48	211.83±3.08	13.6±2.41	86.76±0.99	1.83±0.21	86.76±0.99	98.17±0.21	0.2±0	27.96±1.25	23.68±1.11	1.2±0.03	114.72±3.18	42.31±1.63	50.3±1.2	7.39±0.59	0.005 ± 0.003	PASS	20.2	5	20.8	2.3	7.8	2.3
lab10	102.8±4.29	51.4±2.15	93.51±0.72	97.74±0.32	46.64±0.47	295±1.11	25.12±1.97	92.09±0.62	1.99±0.1	92.09±0.62	98.01±0.1	0.25±0.04	33.39±1.26	33.11±1.47	1.15±0.02	253.89±14.96	48.44±1.61	47.79±1.5	3.77±0.16	0.34 ± 1.04	PASS	14.7	7.4	11.2	6.5	3.1	6.9
lab11	48.89±1.25	24.44±0.63	94.84±0.31	98.27±0.12	50.39±0.13	276.28±2.82	25.22±0.93	94.2±0.3	2.15±0.22	94.2±0.3	97.85±0.22	0.27±0.01	34.03±0.81	34.23±0.82	1.12±0.02	200.28±6.44	77.83±0.72	17.98±0.63	4.19±0.17	0.003 ± 0.001	PASS	25.7	1.6	23.5	2.5	15.4	0.3
lab12	182.9±12.27	91.45±6.14	94.11±0.19	97.98±0.08	46.62±0.48	293.17±1.12	36.72±1.21	91.2±0.65	1.87±0.1	91.2±0.65	98.14±0.1	0.26±0.01	49.78±1.09	49.07±1	1.09±0.01	284.33±6.57	46.52±1.78	49.6±1.71	3.89±0.11	0 ± 0	PASS	25.3	7	24.7	3.3	16	1.8
lab13	83.39±4.68	41.69±2.34	91.37±0.41	96.82±0.21	48.5±0.27	298.17±0.37	15.26±1.08	94.73±0.36	2.74±0.28	94.73±0.36	97.26±0.28	0.39±0.03	28.14±0.88	28.88±0.93	1.16±0.02	514.17±20.62	83.76±0.65	14.32±0.6	1.93±0.07	0 ± 0	PASS	25.8	1.8	25.7	1.5	15.7	0.8
lab14	170.24±12.74	85.12±6.37	94.93±0.32	98.65±0.09	48.66±0.16	198.44±0.5	11.41±0.78	93.64±0.94	1.22±0.08	93.64±0.94	98.77±0.08	0.28±0.01	14.2±0.92	14.85±0.84	1.18±0.02	218.06±6.59	79.26±1.62	18.64±1.53	2.1±0.1	0 ± 0	PASS	21.1	5.7	19.4	6	11.4	5.4
lab15	87.1±2.12	43.55±1.06	94.62±0.19	98.18±0.08	49.85±0.69	297.22±1.31	53.06±9.11	91.52±1.65	5.33±1.8	91.52±1.65	94.67±1.8	0.23±0.01	66.45±9.89	66.82±9.84	1.24±0.09	391.78±29.25	86.55±1.94	11.58±1.82	1.87±0.13	0 ± 0	PASS	2.4	3	1.6	1.4	0.7	1.5
lab16	110.69±23.2	55.35±11.6	93.56±0.19	97.81±0.09	52.69±0.15	262.33±1.41	11.61±1.22	92.67±0.5	2.43±0.12	92.67±0.5	97.57±0.12	0.26±0.01	17.62±1.79	17.04±1.78	1.04±0.02	1332.78±89.36	85.37±0.36	14.38±0.35	0.26±0.01	0 ± 0	PASS	23.1	0.9	19.6	0.8	14.2	1.4
lab17	78.89±4.58	39.44±2.29	89.01±0.3	94.7±0.32	49.35±0.88	261.78±3.33	15.7±1.05	83.4±1.26	5.5±0.47	83.4±1.26	94.5±0.47	0.3±0.01	25.73±1.18	20.11±0.61	1.09±0.02	173.78±5.09	43.97±1.44	51.85±1.4	4.18±0.12	0.001 ± 0	PASS	24.7	2.7	23	1	16.9	1.1
lab18	230±9.08	115±4.54	94.13±0.19	97.95±0.08	48.9±1.98	298.72±0.45	75.52±4.03	92.49±1.02	4.45±0.67	92.49±1.02	95.55±0.67	0.28±0.02	69.68±5.61	69.71±5.62	0±0	393.28±24.69	79.75±5.98	17.02±4.98	3.24±2.34	0 ± 0	PASS	0.8	10.3	0.8	5.9	0.5	2.4
lab19	85.97±13.71	42.98±6.86	91±1.06	97.21±0.36	49.45±0.79	297.5±0.69	5.52±1.11	85.24±1.42	5.35±0.64	85.24±1.42	94.65±0.65	0.39±0.04	9.46±1.57	4.49±0.74	1.09±0.03	344.89±14.73	46.71±1.8	49.21±1.78	4.08±0.18	0 ± 0	PASS	3.6	8.1	5.9	8.3	5.7	7.2
lab20	50.58±2.78	25.29±1.39	92.16±0.39	97.22±0.17	48.59±0.07	297±0.33	20.13±1.26	93.22±0.28	3.86±0.14	93.22±0.28	96.15±0.14	0.35±0.02	33.45±1.21	34.02±1.23	1.14±0.02	423.78±13.13	80.57±0.74	17.41±0.68	2.02±0.07	0.001 ± 0	PASS	36.1	1.2	31.2	1.2	18.6	2.2
lab21	90.58±41.19	45.29±20.59	91.38±0.44	97.25±0.15	49.63±0.19	198.94±0.23	8.54±1.67	94.85±0.28	1.6±0.18	94.85±0.28	98.4±0.18	0.41±0.02	12.13±2.2	12.45±2.28	1.17±0.01	367.89±15.87	77.21±0.75	19.13±0.63	3.66±0.16	0.003 ± 0.003	PASS	28.4	1.2	23.9	4	10.6	6.8
lab22	184.77±9.48	92.39±4.74	91.08±0.76	96.98±0.31	51.22±0.31	199±0	21.75±2.31	80.91±0.79	3.42±0.19	80.91±0.79	96.58±0.19	0.76±0.07	40.38±1.23	39.26±1.25	1.06±0.02	220.22±3.42	41.07±1.62	50.87±1.24	8.06±0.43	0.001 ± 0.001	PASS	31.7	0.9	29.2	0.4	16.3	1.8
lab23	94.67±7.89	47.33±3.95	92.55±0.3	97.08±0.16	50.76±0.86	282.83±0.69	11.99±0.82	85.07±1.66	2.33±0.15	85.07±1.66	97.67±0.16	0.48±0.01	18.47±0.85	18.09±0.76	0.85±0.01	162.67±1.33	36.49±1.08	59.14±1.1	4.37±0.21	0 ± 0	PASS	32.1	2.9	26.9	2.2	12.7	3.4
lab24	380.28±110.03	190.14±55.02	88.44±0.36	96.68±0.12	49.34±0.65	199±0	9.2±1.7	83.61±1.94	4.42±0.81	83.61±1.94	95.58±0.81	0.6±0.01	1.12±0.24	0.29±0.07	0.83±0.02	271.44±5.06	38.65±1.75	57.25±1.57	4.11±0.22	0.007 ± 0.003	PASS	10.5	9.3	11.5	4.5	9.8	1.4
lab27	50.93±5.02	25.46±2.51	94.25±0.15	97.71±0.05	47.02±0.72	295.89±1.33	7.81±1.14	84.94±2.27	5.37±0.36	84.94±2.27	94.63±0.36	0.45±0.01	10.63±1.62	6.22±0.43	1.14±0.03	201.17±9.12	43.73±1.62	52.58±1.54	3.68±0.09	0.004 ± 0.001	PASS	25.1	1.9	15.8	5.7	5.4	1.9
lab28	421.13±46.75	210.56±23.37	89.43±0.69	96.91±0.27	49.22±0.47	199±0	7.26±1.68	81.31±3.34	9.31±3.34	81.31±3.34	90.69±3.34	0.58±0.02	11.64±1.66	0.21±0.07	0.95±0.01	167.44±12.37	38.08±1.24	57.46±1.16	4.46±0.16	0.001 ± 0.002	PASS	20.8	5.8	20.7	4.1	13.4	0.9
lab29	88.55±9.76	44.28±4.88	92.3±0.74	97.2±0.32	49.07±0.42	295.61±0.49	19.16±1.46	87.09±0.85	2.22±0.14	87.09±0.85	97.78±0.14	0.35±0.03	28.51±2.71	25±3.08	1.03±0.02	297±5.19	43.26±1.32	51.32±1.39	5.42±0.18	0 ± 0	PASS	30.2	0.7	27.5	1.3	14	1.5
lab30	77.31±2.99	38.66±1.49	92.65±0.33	97.92±0.1	48.46±0.17	297.11±0.81	4.24±0.32	95.23±0.33	2.33±0.29	95.23±0.33	97.68±0.29	0.38±0.01	6.15±0.53	6.53±0.55	1.15±0.01	423.94±14.4	80.75±0.79	17.46±0.73	1.79±0.07	0.003 ± 0	PASS	31.5	1.1	28.7	1.8	20.6	1.2
lab31	217.03±42.7	108.52±21.35	93.38±0.88	97.75±0.49	47.48±0.6	292.17±1.77	17.08±3.72	88.6±1.71	2.11±0.75	88.6±1.71	97.89±0.75	0.32±0.02	21.41±5.23	18.06±4.56	1.07±0.02	249.89±6.85	45.29±1.46	50.41±1.43	4.3±0.18	0 ± 0	PASS	18.7	2.8	17.6	1.4	8.2	3.1
lab32	46.71±3.95	23.36±1.98	93.36±0.48	97.73±0.2	48.27±0.16	295.28±0.73	36.37±2.18	94.86±0.27	2.52±0.19	94.86±0.27	97.48±0.19	0.32±0.02	53.7±0.93	53.97±0.89	1.24±0.02	448.44±46.42	80.92±0.73	16.39±0.63	2.69±0.15	0.021 ± 0.007	PASS	7.2	22.3	5.7	21.2	2.6	11.6
lab33	210.82±42.04	105.31±20.98	92.46±0.55	97.33±0.19	51.24±0.72	297.72±0.45	33.54±2.6	85.05±1.27	1.86±0.15	85.05±1.27	98.14±0.15	0.52±0.02	17.18±1.58	11.97±1.17	1.04±0.02	286.17±11.01	44.9±1.85	49.39±1.89	5.71±0.3	0 ± 0	PASS	20.6	2.3	17.6	2	14.7	1.3
lab34	41.42±2.13	20.71±1.06	93.52±0.16	97.8±0.07	48.2±0.15	295.22±0.42	37.7±1.03	94.86±0.23	2.56±0.18	94.86±0.23	97.44±0.18	0.31±0.01	54.25±0.79	54.52±0.8	1.24±0.02	470.94±19.77	81.01±0.94	16.34±0.81	2.65±0.14	0.012 ± 0.014	PASS	28.7	2	27.1	1.9	15.4	1.3
lab35	93.99±16.88	47±8.44	92.92±0.68	97.81±0.21	49.26±0.15	297.5±0.5	5.05±0.66	95.39±0.14	1.96±0.12	95.39±0.14	98.04±0.12	0.39±0.03	7.31±0.81	7.77±0.84	1.16±0.01	404.94±20.91	81.37±0.71	16.88±0.62	1.75±0.1	0 ± 0.001	PASS	30.9	1.2	25.3	3.4	12	3.8
lab36	282.42±37.34	141.57±18.76	94.42±0.26	98.35±0.08	47.32±0.49	179±0	24.94±1.02	92.47±0.68	1.36±0.1	92.47±0.68	98.64±0.11	0.31±0.01	15.94±0.75	12.32±0.77	1.06±0.01	221.83±6.79	47.78±1.37	48.42±1.29	3.81±0.11	0 ± 0.001	PASS	23	3.5	22	5.3	13.5	1.4
lab37	66.28±8.53	33.14±4.27	90.69±0.72	96.13±0.43	46.57±1.02	292.33±2.91	8.27±0.73	90.27±1.89	7.09±1.82	90.27±1.89	92.92±1.82	0.43±0.03	14.13±0.61	13.13±0.51	1.03±0.02	251.83±9.96	43.84±1.96	52.7±1.84	3.46±0.14	0.001 ± 0.001	PASS	20.5	6.7	15.2	10.4	3.9	10.6
lab38	40.02±4.35	20.01±2.17	93.45±0.35	97.65±0.16	42.27±0.2	290.78±1.18	8.07±0.45	94.39±0.43	3.32±0.41	94.39±0.43	96.68±0.4	0.31±0.02	11.92±0.37	11.99±0.39	0.98±0.03	229.33±5.78	39.5±1.79	56.89±1.69	3.61±0.12	0.001 ± 0.001	PASS	27.7	0.9	23.4	1	9.9	1.2
lab39	71.18±8.1	35.59±4.05	93.39±0.54	97.61±0.24	49.95±0.38	297±0.58	23.68±1.72	94.64±0.23	2.7±0.14	94.64±0.23	97.3±0.14	0.29±0.03	33.78±0.96	34.1±0.96	1.15±0.03	358.5±15.27	81.99±0.76	15.95±0.7	2.06±0.08	0 ± 0	PASS	19.6	6.9	18.3	4.9	13	2.9
lab40	43.45±2.32	21.73±1.16	94.76±0.39	98.24±0.17	49.51±1.9	297.44±1.3	39.53±10.14	89.49±6.26	6.34±4.94	89.49±6.26	93.66±4.94	0.25±0.02	52.33±11.76	52.6±12.01	1.35±0.11	363.61±33.35	86±3.55	11.63±2.38	2.37±1.26	0 ± 0	PASS	0.1	1.3	-0.1	1.4	-0.1	1.2
lab41	44.44±2.09	22.22±1.05	94.67±0.3	98.22±0.11	49.4±1.05	297.78±0.71	33.28±5.36	91.91±1.55	4.53±1.39	91.91±1.55	95.47±1.39	0.24±0.01	44.56±6.98	44.79±6.95	1.31±0.08	370.33±28.82	86±1.45	12±1.42	2±0.1	0 ± 0	PASS	5.6	1.4	2.5	1.8	1.2	1.4
lab42	126.07±4.99	63.03±2.5	95.08±0.59	98.54±0.19	46.86±0.18	288.94±0.97	14.02±0.89	90.52±0.6	2.61±0.15	90.52±0.6	97.39±0.15	0.29±0.02	20.13±0.96	19.17±1.05	1.19±0.02	245.5±4.45	77.68±0.95	19.38±0.81	2.94±0.16	0.001 ± 0	PASS	35.7	2.7	32.1	2.2	20.2	0.6
lab43	39.53±0.78	19.76±0.39	92.78±0.16	97.33±0.07	48.27±0.12	293.06±1.13	25.43±0.72	92.59±0.68	4.17±0.67	92.59±0.68	95.83±0.67	0.33±0.01	36.94±1.04	37.14±1.08	1.23±0.02	416.83±12.07	80.48±0.67	16.71±0.59	2.81±0.09	0.014 ± 0.003	PASS	31.9	2.4	27.8	0.8	19	0.7
lab44	66.08±5.6	33.04±2.8	91.2±0.29	96.64±0.14	46.36±0.83	277.28±3.33	15.55±0.93	88.07±2.04	3.14±0.2	88.07±2.04	96.86±0.2	0.34±0.01	22.21±1.14	19.95±1.49	1.26±0.02	213.39±11.31	73.39±1.8	23.11±1.72	3.5±0.22	0 ± 0	PASS	8.4	2.3	7.9	2.5	5.9	2.4
lab45	50.67±5.05	25.34±2.52	96.56±0.05	98.94±0.02	47.44±0.38	275.28±2.23	7.39±1.04	83.03±0.96	7.44±0.68	83.03±0.96	92.56±0.68	0.28±0	9.63±1.17	4.11±0.51	1.08±0.03	183.33±4.29	41.99±1.8	54.06±1.72	3.96±0.11	0.004 ± 0	PASS	26.8	2.5	24.4	1.8	9.9	0.4
QC cutoff	/	>20	>85	>90	/	/	<30	>80	/	/	>90	/	/	/	0.8-1.2		/	/	<10	<0.01	PASS	>12	<6	>10	<6	>10	<6
